# Supplementary material for: The Utility of Differential Scanning Calorimetry Curves of Blood Plasma for Diagnosis, Subtype Differentiation and Predicted Survival in Lung Cancer
Source: MDPI journal article supplement (doi:10.3390/cancers13215326), 2021-10-23
Supplement: s1 [file s1]

# Supplementary Materials: The Utility of Differential Scanning Calorimetry Curves of Blood Plasma for Diagnosis, Subtype Differentiation and Predicted Survival in Lung Cancer

Gabriela Schneider, Alagammai Kaliappan, Taylor Q. Nguyen, Robert Buscaglia, Guy N. Brock, Melissa Barousse Hall, Crissie DeSpirito, Daniel W. Wilkey, Michael L. Merchant, Jon B. Klein, Tanya A. Wiese, Hiram L. Rivas-Perez, Goetz H. Kloecker and Nichola C. Garbett

**Table S1.** Detailed patient characteristics and description of specimens included in each analysis.

| Patient ID | Age | Sex    | Ethnicity                 | Smoking Status | Diagnosis | Stage | Included in The Analysis |     |    |     |
|------------|-----|--------|---------------------------|----------------|-----------|-------|--------------------------|-----|----|-----|
|            |     |        |                           |                |           |       | DSC                      | Gly | OS | PFS |
| C1         | 47  | Female | White                     | Never smoked   | Control   |       | Yes                      | No  | No | No  |
| C2         | 41  | Female | White                     | Ex-smoker      | Control   |       | Yes                      | Yes | No | No  |
| C3         | 68  | Female | White                     | Ex-smoker      | Control   |       | Yes                      | Yes | No | No  |
| C4         | 56  | Male   | White                     | Current smoker | Control   |       | Yes                      | No  | No | No  |
| C5         | 49  | Male   | White                     | Never smoked   | Control   |       | Yes                      | No  | No | No  |
| C6         | 59  | Female | White                     | Ex-smoker      | Control   |       | Yes                      | Yes | No | No  |
| C7         | 61  | Female | White                     | Current smoker | Control   |       | Yes                      | Yes | No | No  |
| C8         | 66  | Female | White                     | Current smoker | Control   |       | Yes                      | Yes | No | No  |
| C9         | 46  | Male   | Black or African American | Ex-smoker      | Control   |       | Yes                      | Yes | No | No  |
| C10        | 48  | Female | White                     | Current smoker | Control   |       | Yes                      | Yes | No | No  |
| C11        | 60  | Male   | White                     | Current smoker | Control   |       | Yes                      | Yes | No | No  |
| C12        | 54  | Male   | White                     | Ex-smoker      | Control   |       | Yes                      | Yes | No | No  |
| C13        | 62  | Female | White                     | Ex-smoker      | Control   |       | Yes                      | Yes | No | No  |
| C14        | 63  | Female | Black or African American | Ex-smoker      | Control   |       | Yes                      | Yes | No | No  |
| C15        | 41  | Female | White                     | Current smoker | Control   |       | Yes                      | Yes | No | No  |
| C16        | 75  | Female | White                     | Ex-smoker      | Control   |       | Yes                      | Yes | No | No  |
| C17        | 63  | Female | White                     | Current smoker | Control   |       | Yes                      | Yes | No | No  |
| C18        | 62  | Male   | White                     | Ex-smoker      | Control   |       | Yes                      | Yes | No | No  |
| C19        | 61  | Female | Black or African American | Ex-smoker      | Control   |       | Yes                      | Yes | No | No  |
| C20        | 65  | Female | White                     | Current smoker | Control   |       | Yes                      | Yes | No | No  |
| C21        | 60  | Male   | White                     | Ex-smoker      | Control   |       | Yes                      | Yes | No | No  |

|     |    |        |                           |                |         |      |     |     |     |    |
|-----|----|--------|---------------------------|----------------|---------|------|-----|-----|-----|----|
| C22 | 93 | Female | White                     | Ex-smoker      | Control |      | Yes | Yes | No  | No |
| C23 | 70 | Female | White                     | Never smoked   | Control |      | Yes | No  | No  | No |
| C24 | 80 | Female | White                     | Current smoker | Control |      | Yes | Yes | No  | No |
| C25 | 55 | Male   | White                     | Ex-smoker      | Control |      | Yes | Yes | No  | No |
| C26 | 55 | Male   | White                     | Never smoked   | Control |      | Yes | No  | No  | No |
| C27 | 67 | Male   | White                     | Ex-smoker      | Control |      | Yes | Yes | No  | No |
| C28 | 77 | Female | White                     | Ex-smoker      | Control |      | Yes | Yes | No  | No |
| C29 | 64 | Male   | White                     | Ex-smoker      | Control |      | Yes | Yes | No  | No |
| C30 | 80 | Female | White                     | Never smoked   | Control |      | Yes | No  | No  | No |
| C31 | 73 | Female | White                     | Current smoker | Control |      | Yes | Yes | No  | No |
| C32 | 86 | Female | White                     | Ex-smoker      | Control |      | Yes | Yes | No  | No |
| C33 | 66 | Male   | Black or African American | Ex-smoker      | Control |      | Yes | Yes | No  | No |
| C34 | 59 | Female | White                     | Ex-smoker      | Control |      | Yes | Yes | No  | No |
| C35 | 52 | Female | White                     | Ex-smoker      | Control |      | Yes | Yes | No  | No |
| C36 | 65 | Male   | White                     | Current smoker | Control |      | Yes | Yes | No  | No |
| C37 | 68 | Male   | White                     | Ex-smoker      | Control |      | Yes | Yes | No  | No |
| C38 | 58 | Female | White                     | Ex-smoker      | Control |      | Yes | Yes | No  | No |
| C39 | 62 | Female | Black or African American | Current smoker | Control |      | Yes | Yes | No  | No |
| C40 | 54 | Female | White                     | Ex-smoker      | Control |      | Yes | Yes | No  | No |
| C41 | 56 | Male   | White                     | Ex-smoker      | Control |      | Yes | Yes | No  | No |
| C42 | 85 | Male   | Pakistani                 | Never smoked   | Control |      | Yes | No  | No  | No |
| C43 | 71 | Female | White                     | Never smoked   | Control |      | Yes | Yes | No  | No |
| C44 | 68 | Female | White                     | Ex-smoker      | Control |      | Yes | Yes | No  | No |
| C45 | 45 | Female | White                     | Current smoker | Control |      | Yes | Yes | No  | No |
| C46 | 54 | Female | Black or African American | Never smoked   | Control |      | Yes | No  | No  | No |
| C47 | 55 | Male   | White                     | Current smoker | Control |      | Yes | Yes | No  | No |
| C48 | 59 | Female | White                     | Ex-smoker      | Control |      | Yes | Yes | No  | No |
| C49 | 67 | Female | White                     | Ex-smoker      | Control |      | Yes | No  | No  | No |
| C50 | 70 | Female | White                     | Never smoked   | Control |      | Yes | No  | No  | No |
| C51 | 42 | Male   | White                     | Current Smoker | Control |      | Yes | No  | No  | No |
| L1  | 56 | Female | Black or African American | Ex-smoker      | AC      | Late | Yes | No  | 298 | No |

|     |    |        |                           |                |       |       |     |     |       |       |
|-----|----|--------|---------------------------|----------------|-------|-------|-----|-----|-------|-------|
| L2  | 59 | Female | White                     | Unknown        | AC    | Early | Yes | No  | 1538* | 1538* |
| L3  | 72 | Male   | White                     | Current Smoker | AC    | Early | Yes | Yes | 1518* | 1518* |
| L4  | 71 | Female | White                     | Ex-smoker      | AC    | Early | Yes | Yes | 1403* | 1403* |
| L5  | 79 | Male   | White                     | Ex-smoker      | SCC   | Early | Yes | Yes | 1372* | 1372* |
| L6  | 57 | Female | White                     | Ex-smoker      | AC    | Early | Yes | No  | 1337* | 1337* |
| L7  | 64 | Female | White                     | Ex-smoker      | SCC   | Early | Yes | No  | 574   | No    |
| L8  | 58 | Female | White                     | Current Smoker | SCC   | Late  | Yes | No  | 2913* | 1436  |
| L9  | 55 | Female | White                     | Ex-smoker      | SCLC  | Early | Yes | Yes | No    | No    |
| L10 | 70 | Female | Black or African American | Ex-smoker      | SCC   | Early | Yes | No  | 2415* | 1143  |
| L11 | 59 | Female | Black or African American | Ex-smoker      | AC    | Early | Yes | Yes | 1160  | 736   |
| L12 | 64 | Female | Black or African American | Ex-smoker      | SCC   | Early | Yes | Yes | 882   | No    |
| L13 | 87 | Female | White                     | Never smoked   | AC    | Late  | Yes | No  | No    | Yes   |
| L14 | 76 | Female | White                     | Current Smoker | AC    | Early | Yes | No  | 1216* | 1216* |
| L15 | 64 | Male   | White                     | Current Smoker | AC    | Early | Yes | Yes | 621   | 268   |
| L16 | 80 | Male   | White                     | Ex-smoker      | AC    | Early | Yes | Yes | 105   | No    |
| L17 | 48 | Male   | White                     | Current Smoker | Large | Late  | Yes | No  | 38    | No    |
| L18 | 67 | Male   | White                     | Ex-smoker      | SCC   | Early | Yes | No  | 1390  | 775   |
| L19 | 66 | Male   | White                     | Ex-smoker      | Mix   | Late  | Yes | No  | 1222* | 1222* |
| L20 | 53 | Female | White                     | Current Smoker | Large | Late  | Yes | No  | 164   | 111   |
| L21 | 77 | Female | White                     | Ex-smoker      | SCC   | Late  | Yes | No  | 1239  | 419   |
| L22 | 73 | Male   | White                     | Never smoked   | NOS   | Late  | Yes | No  | 351   | No    |
| L23 | 48 | Male   | White                     | Current Smoker | SCC   | Late  | Yes | No  | 812   | No    |
| L24 | 57 | Male   | White                     | Current Smoker | SCC   | Late  | Yes | Yes | 110   | 94    |
| L25 | 74 | Male   | Black or African American | Ex-smoker      | SCC   | Early | Yes | No  | 476   | No    |
| L26 | 77 | Male   | White                     | Ex-smoker      | AC    | Early | Yes | Yes | 1098* | 1098* |
| L27 | 67 | Male   | White                     | Ex-smoker      | AC    | Early | Yes | Yes | 1167* | 1167* |
| L28 | 47 | Female | White                     | Ex-smoker      | AC    | Late  | Yes | No  | 746   | No    |
| L29 | 54 | Male   | Black or African American | Ex-smoker      | AC    | Late  | Yes | No  | 184   | No    |
| L30 | 67 | Female | White                     | Ex-smoker      | AC    | Early | Yes | No  | 2640* | 1289  |
| L31 | 72 | Male   | White                     | Ex-smoker      | SCLC  | Late  | Yes | Yes | No    | No    |

|     |    |        |                           |                |       |       |     |     |       |       |
|-----|----|--------|---------------------------|----------------|-------|-------|-----|-----|-------|-------|
| L32 | 62 | Female | White                     | Current Smoker | AC    | Early | Yes | No  | 754   | 482   |
| L33 | 48 | Male   | White                     | Ex-smoker      | AC    | Late  | Yes | Yes | 98    | No    |
| L34 | 68 | Male   | White                     | Ex-smoker      | AC    | Late  | Yes | No  | 170   | No    |
| L35 | 57 | Female | White                     | Current Smoker | AC    | Early | Yes | Yes | 1021* | 1021* |
| L36 | 56 | Male   | White                     | Current Smoker | AC    | Late  | Yes | Yes | 462   | 339   |
| L37 | 53 | Female | White                     | Current Smoker | AC    | Late  | Yes | No  | No    | No    |
| L38 | 56 | Female | Black or African American | Current Smoker | AC    | Early | Yes | Yes | 1146* | 1146* |
| L39 | 53 | Female | White                     | Current Smoker | AC    | Early | Yes | Yes | 1093* | 1093* |
| L40 | 53 | Male   | White                     | Current Smoker | SCC   | Early | Yes | No  | 1099* | 1099* |
| L41 | 70 | Female | White                     | Ex-smoker      | Large | Early | Yes | No  | No    | No    |
| L42 | 63 | Male   | White                     | Current Smoker | AC    | Early | Yes | Yes | 1042* | 1042* |
| L43 | 62 | Male   | White                     | Ex-smoker      | SCC   | Early | Yes | No  | No    | No    |
| L44 | 73 | Female | White                     | Ex-smoker      | AC    | Early | Yes | Yes | 1010* | 1010* |
| L45 | 58 | Male   | White                     | Ex-smoker      | AC    | Late  | Yes | Yes | 1131* | 1131* |
| L46 | 41 | Male   | Asian                     | Ex-smoker      | AC    | Early | Yes | Yes | No    | No    |
| L47 | 60 | Female | White                     | Never smoked   | AC    | Early | Yes | No  | 4431* | 395   |
| L48 | 60 | Female | White                     | Never smoked   | AC    | Early | Yes | No  | No    | No    |
| L49 | 74 | Female | Black or African American | Ex-smoker      | SCC   | Early | Yes | No  | 989*  | 989*  |
| L50 | 73 | Female | White                     | Ex-smoker      | AC    | Early | Yes | No  | 987*  | 987*  |
| L51 | 58 | Female | White                     | Ex-smoker      | SCC   | Early | Yes | No  | 536   | No    |
| L52 | 52 | Female | White                     | Ex-smoker      | SCC   | Early | Yes | Yes | 1084  | 406   |
| L53 | 63 | Male   | White                     | Ex-smoker      | SCC   | Late  | Yes | No  | 252   | 116   |
| L54 | 52 | Female | White                     | Ex-smoker      | AC    | Late  | Yes | Yes | 445   | No    |
| L55 | 76 | Female | White                     | Ex-smoker      | SCC   | Early | Yes | Yes | 962*  | 962*  |
| L56 | 50 | Female | White                     | Current Smoker | AC    | Early | Yes | Yes | 1823* | 827   |
| L57 | 53 | Female | White                     | Ex-smoker      | AC    | Late  | Yes | No  | 1627  | 1168  |
| L58 | 42 | Male   | White                     | Current Smoker | AC    | Late  | Yes | Yes | 206   | No    |
| L59 | 66 | Male   | White                     | Current Smoker | AC    | Late  | Yes | Yes | 1529  | 989   |
| L60 | 73 | Female | White                     | Current Smoker | SCC   | Late  | Yes | No  | No    | No    |
| L61 | 52 | Female | Black or African American | Ex-smoker      | SCLC  | Early | Yes | Yes | 439   | 102   |
| L62 | 73 | Male   | White                     | Ex-smoker      | SCC   | Late  | Yes | Yes | 250   | 194   |

|     |    |        |                           |                |       |       |     |     |       |       |
|-----|----|--------|---------------------------|----------------|-------|-------|-----|-----|-------|-------|
| L63 | 55 | Male   | White                     | Current Smoker | SCC   | Late  | Yes | Yes | No    | No    |
| L64 | 69 | Female | Black or African American | Current Smoker | SCC   | Late  | Yes | No  | 2764  | 720   |
| L65 | 66 | Female | White                     | Current Smoker | SCLC  | Early | Yes | Yes | No    | No    |
| L66 | 61 | Male   | White                     | Current Smoker | SCC   | Late  | Yes | No  | 689   | 267   |
| L67 | 78 | Male   | White                     | Ex-smoker      | SCC   | Early | Yes | Yes | 521   | No    |
| L68 | 44 | Male   | White                     | Current Smoker | AC    | Late  | Yes | No  | 718   | 282   |
| L69 | 47 | Male   | Black or African American | Current Smoker | SCC   | Early | Yes | Yes | 3260  | 2995  |
| L70 | 47 | Female | White                     | Current Smoker | AC    | Early | Yes | Yes | 3248* | 3248* |
| L71 | 70 | Female | White                     | Ex-smoker      | SCLC  | Early | Yes | Yes | No    | No    |
| L72 | 48 | Male   | Black or African American | Current Smoker | NOS   | Late  | Yes | No  | 128   | No    |
| L73 | 71 | Male   | Black or African American | Current Smoker | SCC   | Early | Yes | Yes | No    | No    |
| L74 | 75 | Male   | White                     | Ex-smoker      | Large | Early | Yes | No  | 347   | 176   |
| L75 | 49 | Male   | White                     | Current Smoker | SCLC  | Early | Yes | Yes | 256   | 196   |
| L76 | 74 | Male   | White                     | Ex-smoker      | SCC   | Late  | Yes | No  | 238   | No    |
| L77 | 50 | Female | White                     | Current Smoker | SCLC  | Late  | Yes | Yes | 275   | No    |
| L78 | 47 | Female | White                     | Ex-smoker      | AC    | Early | Yes | Yes | 447   | 218   |
| L79 | 49 | Male   | White                     | Ex-smoker      | AC    | Late  | Yes | Yes | 1044  | 589   |
| L80 | 75 | Male   | White                     | Ex-smoker      | SCC   | Late  | Yes | No  | No    | No    |
| L81 | 66 | Male   | Black or African American | Current Smoker | NOS   | Late  | Yes | No  | 198   | No    |
| L82 | 63 | Male   | White                     | Ex-smoker      | SCLC  | Late  | Yes | Yes | 380   | No    |
| L83 | 64 | Male   | Black or African American | Ex-smoker      | AC    | Late  | Yes | Yes | 476   | 188   |
| L84 | 77 | Male   | White                     | Ex-smoker      | SCC   | Early | Yes | No  | 70    | No    |
| L85 | 62 | Female | White                     | Ex-smoker      | AC    | Early | Yes | Yes | 2035  | 594   |
| L86 | 54 | Male   | White                     | Current Smoker | NOS   | Late  | Yes | No  | 73    | No    |
| L87 | 51 | Female | Black or African American | Current Smoker | AC    | Late  | Yes | Yes | 159   | No    |
| L88 | 55 | Female | White                     | Current Smoker | NOS   | Late  | Yes | No  | 93    | 80    |
| L89 | 66 | Female | White                     | Ex-smoker      | SCLC  | Early | Yes | Yes | 2524* | 2524* |

|      |    |        |                           |                |      |       |     |     |       |       |
|------|----|--------|---------------------------|----------------|------|-------|-----|-----|-------|-------|
| L90  | 65 | Female | White                     | Current Smoker | NOS  | Late  | Yes | No  | 248   | No    |
| L91  | 76 | Male   | White                     | Ex-smoker      | SCC  | Early | Yes | No  | 1022  | 284   |
| L92  | 57 | Male   | White                     | Ex-smoker      | SCC  | Late  | Yes | Yes | 495   | 211   |
| L93  | 65 | Female | White                     | Current Smoker | SCC  | Early | Yes | Yes | 2499* | 2499* |
| L94  | 48 | Female | White                     | Ex-smoker      | SCLC | Early | Yes | Yes | 206   | 162   |
| L95  | 63 | Female | White                     | Ex-smoker      | AC   | Late  | Yes | No  | 105   | No    |
| L96  | 43 | Female | Black or African American | Current Smoker | AC   | Early | Yes | Yes | 2580* | 2580* |
| L97  | 75 | Female | White                     | Ex-smoker      | AC   | Late  | Yes | No  | 1595  | 1290  |
| L98  | 50 | Male   | Black or African American | Current Smoker | AC   | Early | Yes | No  | 1504  | 1348  |
| L99  | 58 | Male   | White                     | Unknown        | AC   | Late  | Yes | No  | 186   | No    |
| L100 | 62 | Male   | White                     | Current Smoker | SCC  | Late  | Yes | Yes | 808   | 358   |
| L101 | 43 | Male   | White                     | Current Smoker | SCLC | Early | Yes | Yes | 2540* | 2540* |
| L102 | 51 | Female | Black or African American | Ex-smoker      | AC   | Early | Yes | Yes | 2429* | 2429* |
| L103 | 51 | Male   | White                     | Never smoked   | AC   | Late  | Yes | No  | 592   | 315   |
| L104 | 59 | Female | Black or African American | Current Smoker | AC   | Early | Yes | Yes | 369   | 287   |
| L105 | 61 | Female | Black or African American | Current Smoker | SCC  | Early | Yes | Yes | 1171  | 630   |
| L106 | 50 | Male   | White                     | Ex-smoker      | AC   | Late  | Yes | Yes | 103   | No    |
| L107 | 44 | Female | White                     | Ex-smoker      | AC   | Late  | Yes | No  | 2166  | 658   |
| L108 | 59 | Female | White                     | Current Smoker | AC   | Early | Yes | No  | 2335* | 1685  |
| L109 | 58 | Male   | White                     | Current Smoker | AC   | Late  | Yes | Yes | 282   | No    |
| L110 | 65 | Female | White                     | Ex-smoker      | SCC  | Late  | Yes | Yes | 109   | No    |
| L111 | 65 | Male   | White                     | Never smoked   | AC   | Late  | Yes | No  | 3664  | 1808  |
| L112 | 47 | Male   | White                     | Ex-smoker      | SCC  | Late  | Yes | No  | 597   | 336   |
| L113 | 52 | Female | White                     | Ex-smoker      | SCLC | Late  | Yes | No  | 437   | 303   |
| L114 | 51 | Male   | White                     | Ex-smoker      | SCC  | Late  | Yes | No  | 177   | 141   |
| L115 | 49 | Female | White                     | Current Smoker | SCC  | Early | Yes | Yes | 2251* | 2251* |
| L116 | 43 | Female | White                     | Current Smoker | SCLC | Late  | Yes | Yes | 298   | 158   |
| L117 | 54 | Male   | Black or African American | Current Smoker | AC   | Late  | Yes | No  | 535   | 332   |

|      |    |        |                           |                |       |       |     |     |       |       |
|------|----|--------|---------------------------|----------------|-------|-------|-----|-----|-------|-------|
| L118 | 56 | Male   | Black or African American | Current Smoker | SCLC  | Early | Yes | No  | 1736  | 1616  |
| L119 | 56 | Female | White                     | Ex-smoker      | AC    | Early | Yes | Yes | 1359  | No    |
| L120 | 49 | Female | Black or African American | Ex-smoker      | AC    | Early | Yes | Yes | 3849* | 3849* |
| L121 | 57 | Female | White                     | Current Smoker | SCC   | Early | Yes | No  | 1918* | 1918* |
| L122 | 65 | Male   | White                     | Current Smoker | AC    | Early | Yes | No  | 224   | No    |
| L123 | 49 | Male   | White                     | Ex-smoker      | Mix   | Early | Yes | No  | 874   | 351   |
| L124 | 61 | Male   | Black or African American | Ex-smoker      | NOS   | Early | Yes | No  | 1823* | 1823* |
| L125 | 57 | Female | Black or African American | Current Smoker | AC    | Early | Yes | Yes | 518   | No    |
| L126 | 49 | Female | White                     | Current Smoker | SCC   | Early | Yes | Yes | 322   | No    |
| L127 | 53 | Female | White                     | Current Smoker | SCC   | Late  | Yes | Yes | 115   | No    |
| L128 | 67 | Female | Black or African American | Ex-smoker      | AC    | Late  | Yes | No  | 260   | No    |
| L129 | 48 | Male   | White                     | Never smoked   | AC    | Early | Yes | No  | No    | No    |
| L130 | 55 | Female | White                     | Current Smoker | NOS   | Early | Yes | No  | 129   | No    |
| L131 | 60 | Male   | Black or African American | Ex-smoker      | Large | Early | Yes | No  | 407   | No    |
| L132 | 50 | Male   | Black or African American | Current Smoker | AC    | Late  | Yes | Yes | 1267  | 894   |
| L133 | 79 | Male   | White                     | Ex-smoker      | AC    | Late  | Yes | No  | 117   | No    |
| L134 | 55 | Female | White                     | Current Smoker | SCC   | Late  | Yes | Yes | 72    | No    |
| L135 | 61 | Female | White                     | Current Smoker | SCLC  | Early | Yes | No  | 336   | No    |
| L136 | 47 | Male   | White                     | Current Smoker | AC    | Late  | Yes | Yes | 583   | No    |
| L137 | 57 | Female | White                     | Current Smoker | AC    | Late  | Yes | Yes | 308   | 222   |
| L138 | 63 | Female | White                     | Ex-smoker      | SCC   | Early | Yes | Yes | 135   | No    |
| L139 | 45 | Female | White                     | Ex-smoker      | AC    | Late  | Yes | No  | 456   | No    |
| L140 | 66 | Female | White                     | Ex-smoker      | SCC   | Late  | Yes | Yes | 293   | No    |
| L141 | 71 | Male   | Black or African American | Ex-smoker      | SCC   | Late  | Yes | Yes | 320   | No    |
| L142 | 54 | Female | White                     | Ex-smoker      | SCLC  | Early | Yes | Yes | No    | No    |
| L143 | 62 | Male   | White                     | Unknown        | SCC   | Late  | Yes | No  | 222   | 122   |

|      |    |        |                           |                |       |       |     |     |      |      |
|------|----|--------|---------------------------|----------------|-------|-------|-----|-----|------|------|
| L144 | 49 | Female | White                     | Current Smoker | AC    | Late  | Yes | Yes | 143  | No   |
| L145 | 50 | Male   | White                     | Current Smoker | AC    | Late  | Yes | No  | 369  | No   |
| L146 | 44 | Male   | Black or African American | Current Smoker | Large | Early | Yes | No  | 666  | 501  |
| L147 | 71 | Male   | White                     | Ex-smoker      | SCC   | Late  | Yes | No  | 1323 | 1238 |
| L148 | 71 | Male   | White                     | Current Smoker | AC    | Early | Yes | No  | 439  | 421  |

Legend: AC, Adenocarcinoma; DSC, differential scanning calorimetry; Early, early-stage (stages 1–3a); Large, large cell carcinoma; Late, late-stage (stages 3b–4); Mix, Mixed type; NOS, not otherwise specified; Gly, glycosylation analysis; OS, overall survival analysis; PFS, progression-free survival analysis; SCC, squamous cell carcinoma; SCLC, small cell lung cancer; \* indicates samples for whom the event (death or progression) had not occurred at the time of data collection, where the survival time indicates the end of observation for this study. For samples for which OS and PFS data were available, the time is included in the table as a day count.

**Table S3.** P-values for the difference in summary metrics or PCs of LC and control patients across LC type, stage, smoking status, overall and progression-free survival.

| Group Comparison vs Control |                            |                                           |                            |                                           |                            |                                           |                            |                                           |
|-----------------------------|----------------------------|-------------------------------------------|----------------------------|-------------------------------------------|----------------------------|-------------------------------------------|----------------------------|-------------------------------------------|
| Parameter                   | All LC patients            |                                           | Type of LC                 |                                           |                            |                                           |                            |                                           |
|                             | Unadjusted <i>p</i> -value | FDR <sup>1</sup> adjusted <i>p</i> -value | All LC patients            |                                           | AC                         |                                           | SCC                        |                                           |
|                             |                            |                                           | Unadjusted <i>p</i> -value | FDR <sup>1</sup> adjusted <i>p</i> -value | Unadjusted <i>p</i> -value | FDR <sup>1</sup> adjusted <i>p</i> -value | Unadjusted <i>p</i> -value | FDR <sup>1</sup> adjusted <i>p</i> -value |
| Area                        | 0.1779                     | 0.3380                                    | 0.1479                     | 0.4684                                    |                            |                                           |                            |                                           |
| Height                      | 0.7222                     | 0.8884                                    | 0.9268                     | 0.9698                                    |                            |                                           |                            |                                           |
| Width                       | 0.7481                     | 0.8884                                    | 0.6513                     | 0.9698                                    |                            |                                           |                            |                                           |
| T <sub>max</sub>            | 0.0101                     | 0.0479                                    | 0.2522                     | 0.5990                                    |                            |                                           |                            |                                           |
| T <sub>FM</sub>             | 0.1987                     | 0.3432                                    | 0.7125                     | 0.9698                                    |                            |                                           |                            |                                           |
| Peak 1                      | 0.6178                     | 0.8384                                    | 0.8975                     | 0.9698                                    |                            |                                           |                            |                                           |
| Peak 2                      | 0.4634                     | 0.6773                                    | 0.9698                     | 0.9698                                    |                            |                                           |                            |                                           |
| Peak 3                      | 0.0244                     | 0.0773                                    | 0.1769                     | 0.4802                                    |                            |                                           |                            |                                           |
| Peak 1/2                    | 0.9653                     | 0.9653                                    | 0.7767                     | 0.9698                                    |                            |                                           |                            |                                           |
| Peak 1/3                    | 0.3599                     | 0.5698                                    | 0.4401                     | 0.7819                                    |                            |                                           |                            |                                           |
| Peak 2/3                    | 0.0060                     | 0.0380                                    | 0.0022                     | 0.0418                                    |                            |                                           |                            |                                           |
| T <sub>peak1</sub>          | 0.0020                     | 0.0190                                    | 0.0896                     | 0.3792                                    |                            |                                           |                            |                                           |
| T <sub>peak2</sub>          | 0.1021                     | 0.2667                                    | 0.4470                     | 0.7819                                    |                            |                                           |                            |                                           |
| PC1                         | 0.9205                     | 0.9653                                    | 0.8880                     | 0.9698                                    |                            |                                           |                            |                                           |
| PC2                         | 0.0003                     | 0.0057                                    | 0.0299                     | 0.2841                                    |                            |                                           |                            |                                           |
| PC3                         | 0.1388                     | 0.2930                                    | 0.0936                     | 0.3792                                    |                            |                                           |                            |                                           |
| PC4                         | 0.0161                     | 0.0773                                    | 0.0998                     | 0.3792                                    |                            |                                           |                            |                                           |
| PC5                         | 0.7844                     | 0.9653                                    | 0.8831                     | 0.9698                                    |                            |                                           |                            |                                           |
| PC6                         | 0.1123                     | 0.2667                                    | 0.4527                     | 0.7819                                    |                            |                                           |                            |                                           |
| Stage comparison vs Control |                            |                                           |                            |                                           |                            |                                           |                            |                                           |
| Parameter                   | All LC patients            |                                           | AC                         |                                           | SCC                        |                                           | SCLC                       |                                           |
|                             | Unadjusted <i>p</i> -value | FDR <sup>1</sup> adjusted <i>p</i> -value | Unadjusted <i>p</i> -value | FDR <sup>1</sup> adjusted <i>p</i> -value | Unadjusted <i>p</i> -value | FDR <sup>1</sup> adjusted <i>p</i> -value | Unadjusted <i>p</i> -value | FDR <sup>1</sup> adjusted <i>p</i> -value |
| Area                        | 0.2839                     | 0.6335                                    | 0.1218                     | 0.3306                                    | 0.9805                     | 0.9805                                    | 0.2337                     | 0.5550                                    |
| Height                      | 0.9104                     | 0.9126                                    | 0.8443                     | 0.9611                                    | 0.7611                     | 0.9641                                    | 0.6485                     | 0.7784                                    |
| Width                       | 0.6654                     | 0.8428                                    | 0.6654                     | 0.9611                                    | 0.5621                     | 0.9641                                    | 0.6998                     | 0.7784                                    |
| T <sub>max</sub>            | 0.3579                     | 0.6335                                    | 0.7051                     | 0.9611                                    | 0.0094                     | 0.0893                                    | 0.5189                     | 0.7784                                    |
| T <sub>FM</sub>             | 0.4001                     | 0.6635                                    | 0.4091                     | 0.8081                                    | 0.6725                     | 0.9641                                    | 0.3722                     | 0.7072                                    |



|                    |        |        |        |        |        |        |        |        |
|--------------------|--------|--------|--------|--------|--------|--------|--------|--------|
| Peak 1             | 0.9049 | 0.9126 | 0.8953 | 0.9611 | 0.6397 | 0.9641 | 0.7005 | 0.7784 |
| Peak 2             | 0.3949 | 0.6335 | 0.4253 | 0.8081 | 0.4065 | 0.9641 | 0.4933 | 0.7784 |
| Peak 3             | 0.0562 | 0.2136 | 0.0832 | 0.2891 | 0.7421 | 0.9641 | 0.1440 | 0.4688 |
| Peak 1/2           | 0.7726 | 0.9126 | 0.8157 | 0.9611 | 0.6046 | 0.9641 | 0.6309 | 0.7784 |
| Peak 1/3           | 0.6398 | 0.8428 | 0.5091 | 0.8794 | 0.9312 | 0.9805 | 0.3057 | 0.6454 |
| Peak 2/3           | 0.0014 | 0.0095 | 0.0018 | 0.0181 | 0.4245 | 0.9641 | 0.1503 | 0.4688 |
| T <sub>peak1</sub> | 0.0015 | 0.0095 | 0.0019 | 0.0181 | 0.0144 | 0.0912 | 0.7374 | 0.7784 |
| T <sub>peak2</sub> | 0.3208 | 0.6335 | 0.0913 | 0.2891 | 0.6591 | 0.9641 | 0.0024 | 0.0456 |
| PC1                | 0.9126 | 0.9126 | 0.9301 | 0.9611 | 0.5762 | 0.9641 | 0.7962 | 0.7962 |
| PC2                | 0.0001 | 0.0019 | 0.0139 | 0.0880 | 0.0087 | 0.0893 | 0.1017 | 0.4688 |
| PC3                | 0.2475 | 0.6334 | 0.1682 | 0.3995 | 0.9653 | 0.9805 | 0.1424 | 0.4688 |
| PC4                | 0.0382 | 0.1815 | 0.0257 | 0.1221 | 0.2503 | 0.9641 | 0.5807 | 0.7784 |
| PC5                | 0.6435 | 0.8428 | 0.9611 | 0.9611 | 0.9202 | 0.9805 | 0.1646 | 0.4688 |
| PC6                | 0.1954 | 0.6188 | 0.7513 | 0.9611 | 0.3649 | 0.9641 | 0.1727 | 0.4688 |

#### Smoking status

| Parameter          | All LC patients    |                                   |
|--------------------|--------------------|-----------------------------------|
|                    | Unadjusted p-value | FDR <sup>1</sup> adjusted p-value |
| Area               | 0.6718             | 0.8973                            |
| Height             | 0.8501             | 0.8973                            |
| Width              | 0.5282             | 0.8973                            |
| T <sub>max</sub>   | 0.5804             | 0.8973                            |
| T <sub>FM</sub>    | 0.5282             | 0.8973                            |
| Peak 1             | 0.9673             | 0.9673                            |
| Peak 2             | 0.4737             | 0.8973                            |
| Peak 3             | 0.1900             | 0.7220                            |
| Peak 1/2           | 0.8423             | 0.8973                            |
| Peak 1/3           | 0.7721             | 0.8973                            |
| Peak 2/3           | 0.3263             | 0.8973                            |
| T <sub>peak1</sub> | 0.0314             | 0.1988                            |
| T <sub>peak2</sub> | 0.7690             | 0.8973                            |
| PC1                | 0.7866             | 0.8973                            |
| PC2                | 0.0093             | 0.1739                            |
| PC3                | 0.4660             | 0.8973                            |
| PC4                | 0.0183             | 0.1739                            |
| PC5                | 0.0880             | 0.4180                            |
| PC6                | 0.3850             | 0.8973                            |

#### Overall Survival

| Parameter        | All LC patients    |                                   | AC                 |                                   | SCC                |                                   | SCLC               |                                   |
|------------------|--------------------|-----------------------------------|--------------------|-----------------------------------|--------------------|-----------------------------------|--------------------|-----------------------------------|
|                  | Unadjusted p-value | FDR <sup>1</sup> adjusted p-value |
| Area             | 0.2684             | 0.5917                            | 0.4810             | 0.5782                            | 0.2808             | 0.9551                            | 0.8751             | 0.9854                            |
| Height           | 0.3423             | 0.5917                            | 0.4722             | 0.5782                            | 0.5310             | 0.9551                            | 0.7661             | 0.9854                            |
| Width            | 0.6283             | 0.7761                            | 0.4233             | 0.5782                            | 0.8041             | 0.9551                            | 0.9136             | 0.9854                            |
| T <sub>max</sub> | 0.0214             | 0.1123                            | 0.0149             | 0.1012                            | 0.6569             | 0.9551                            | 0.0206             | 0.1442                            |
| T <sub>FM</sub>  | 0.7669             | 0.8476                            | 0.8390             | 0.8810                            | 0.5311             | 0.9551                            | 0.9136             | 0.9854                            |
| Peak 1           | 0.3573             | 0.5917                            | 0.4956             | 0.5782                            | 0.5310             | 0.9551                            | 0.7661             | 0.9854                            |
| Peak 2           | 0.1289             | 0.4512                            | 0.0428             | 0.1498                            | 0.5457             | 0.9551                            | 0.9854             | 0.9854                            |
| Peak 3           | 0.6694             | 0.7810                            | 0.9967             | 0.9967                            | 0.8700             | 0.9551                            | 0.9427             | 0.9854                            |
| Peak 1/2         | 0.4913             | 0.7267                            | 0.4116             | 0.5782                            | 0.7300             | 0.9551                            | 0.4945             | 0.9854                            |

|                        |        |        |        |        |        |        |        |        |
|------------------------|--------|--------|--------|--------|--------|--------|--------|--------|
| Peak 1/3               | 0.9167 | 0.9443 | 0.4319 | 0.5782 | 0.3934 | 0.9551 | 0.9136 | 0.9854 |
| Peak 2/3               | 0.0142 | 0.0994 | 0.0201 | 0.1012 | 0.4782 | 0.9551 | 0.6969 | 0.9854 |
| T <sub>peak1</sub>     | 0.0077 | 0.0994 | 0.0077 | 0.1012 | 0.5800 | 0.9551 | 0.0206 | 0.1442 |
| T <sub>peak1</sub> IQR | 0.5839 | 0.7663 | 0.1842 | 0.5526 | 0.6226 | 0.9551 | 0.2536 | 0.9854 |
| T <sub>peak2</sub>     | 0.3663 | 0.5917 | 0.3950 | 0.5782 | 0.5314 | 0.9551 | 0.0016 | 0.0336 |
| T <sub>peak2</sub> IQR | 0.0739 | 0.3103 | 0.0155 | 0.1012 | 0.9501 | 0.9551 | 0.8345 | 0.9854 |
| PC1                    | 0.5191 | 0.7267 | 0.2983 | 0.5782 | 0.7618 | 0.9551 | 0.4945 | 0.9854 |
| PC2                    | 0.0133 | 0.0994 | 0.0241 | 0.1012 | 0.8792 | 0.9551 | 0.5324 | 0.9854 |
| PC3                    | 0.1694 | 0.5082 | 0.4422 | 0.5782 | 0.2419 | 0.9551 | 0.8751 | 0.9854 |
| PC4                    | 0.2875 | 0.5917 | 0.8008 | 0.8810 | 0.1260 | 0.9551 | 0.9428 | 0.9854 |
| PC5                    | 0.9443 | 0.9443 | 0.3228 | 0.5782 | 0.7782 | 0.9551 | 0.1919 | 0.9854 |
| PC6                    | 0.2397 | 0.5917 | 0.3763 | 0.5782 | 0.9551 | 0.9551 | 0.3129 | 0.9854 |

#### Progression-free survival

| Parameter              | All LC patients    |                                   | AC                 |                                   | SCC                |                                   | SCLC               |                                   |
|------------------------|--------------------|-----------------------------------|--------------------|-----------------------------------|--------------------|-----------------------------------|--------------------|-----------------------------------|
|                        | Unadjusted p-value | FDR <sup>1</sup> adjusted p-value |
| Area                   | 0.1026             | 0.4309                            | 0.2315             | 0.5402                            | 0.1806             | 0.9001                            | 0.4000             | 0.8357                            |
| Height                 | 0.3770             | 0.6863                            | 0.3583             | 0.6840                            | 0.6348             | 0.9435                            | 0.7163             | 0.8357                            |
| Width                  | 0.8829             | 0.9144                            | 0.5488             | 0.7083                            | 0.6046             | 0.9435                            | 0.6547             | 0.8357                            |
| T <sub>max</sub>       | 0.0014             | 0.0098                            | 0.0863             | 0.4652                            | 0.0747             | 0.7844                            | 0.1005             | 0.5276                            |
| T <sub>FM</sub>        | 0.6616             | 0.8363                            | 0.5734             | 0.7083                            | 0.8655             | 0.9435                            | 0.6547             | 0.8357                            |
| Peak 1                 | 0.4214             | 0.6864                            | 0.4106             | 0.7083                            | 0.6348             | 0.9435                            | 0.7163             | 0.8357                            |
| Peak 2                 | 0.1501             | 0.4503                            | 0.0730             | 0.4652                            | 0.7623             | 0.9435                            | 0.8715             | 0.8860                            |
| Peak 3                 | 0.1269             | 0.4442                            | 0.4835             | 0.7083                            | 0.5166             | 0.9435                            | 0.5487             | 0.8357                            |
| Peak 1/2               | 0.8477             | 0.9144                            | 0.7552             | 0.7930                            | 0.8986             | 0.9435                            | 0.8860             | 0.8860                            |
| Peak 1/3               | 0.6770             | 0.8363                            | 0.6132             | 0.7121                            | 0.3318             | 0.9435                            | 0.6547             | 0.8357                            |
| Peak 2/3               | 0.2040             | 0.5355                            | 0.1329             | 0.4652                            | 0.8495             | 0.9435                            | 0.5487             | 0.8357                            |
| T <sub>peak1</sub>     | 0.0004             | 0.0084                            | 0.1231             | 0.4652                            | 0.0348             | 0.7308                            | 0.1005             | 0.5276                            |
| T <sub>peak1</sub> IQR | 0.5340             | 0.7476                            | 0.3581             | 0.6840                            | 0.7968             | 0.9435                            | 0.6997             | 0.8357                            |
| T <sub>peak2</sub>     | 0.2742             | 0.6113                            | 0.5668             | 0.7083                            | 0.6543             | 0.9435                            | 0.3530             | 0.8357                            |
| T <sub>peak2</sub> IQR | 0.4249             | 0.6864                            | 0.2259             | 0.5402                            | 0.8031             | 0.9435                            | 0.0082             | 0.1722                            |
| PC1                    | 0.2911             | 0.6113                            | 0.2110             | 0.5402                            | 0.6348             | 0.9435                            | 0.8860             | 0.8860                            |
| PC2                    | 0.0008             | 0.0084                            | 0.0932             | 0.4652                            | 0.1603             | 0.9009                            | 0.2125             | 0.8357                            |
| PC3                    | 0.0638             | 0.3350                            | 0.1280             | 0.4652                            | 0.2939             | 0.9435                            | 0.4000             | 0.8357                            |
| PC4                    | 0.7608             | 0.8776                            | 0.6443             | 0.7121                            | 0.9538             | 0.9538                            | 0.5186             | 0.8357                            |
| PC5                    | 0.4786             | 0.7179                            | 0.8388             | 0.8388                            | 0.8319             | 0.9435                            | 0.0266             | 0.2793                            |
| PC6                    | 0.9144             | 0.9144                            | 0.4906             | 0.7083                            | 0.2145             | 0.9009                            | 0.3717             | 0.8357                            |

Legend: AC, Adenocarcinoma; <sup>1</sup>FDR, false discovery rate; IQR, interquartile range [Q1, Q3]; LC, lung cancer; PC, principal component; SCC, squamous cell carcinoma; SCLC, small cell lung cancer.

**Table S4.** Associations between summary metrics / PCs and the clinical group. Summary metrics / PCs were dichotomized based on either the median value or interquartile range (IQR) calculated for control subjects.

| Parameter | Range       | Control (n = 51) | LC (n = 148) | Unadjusted p-value | FDR <sup>1</sup> adjusted p-value |
|-----------|-------------|------------------|--------------|--------------------|-----------------------------------|
| Area      | < median    | 25 (49.0%)       | 70 (47.3%)   | 0.8718             | 0.9202                            |
|           | ≥ median    | 26 (51.0 %)      | 78 (52.7%)   |                    |                                   |
|           | Outside IQR | 26 (51.0 %)      | 81 (54.7%)   | 0.7449             | 0.9999                            |
|           | Within IQR  | 25 (49.0%)       | 67 (45.3)    |                    |                                   |
| Height    | < median    | 25 (49.0%)       | 63 (42.6%)   | 0.5135             | 0.8908                            |
|           | ≥ median    | 26 (51.0 %)      | 85 (57.4%)   |                    |                                   |

|                    |             |             |            |        |        |
|--------------------|-------------|-------------|------------|--------|--------|
|                    | Outside IQR | 26 (51.0 %) | 64 (43.2%) |        |        |
|                    | Within IQR  | 25 (49.0%)  | 84 (56.8%) | 0.4150 | 0.8166 |
| Width              | < median    | 24 (47.1%)  | 70 (47.3%) | 0.9999 | 0.9999 |
|                    | ≥ median    | 27 (52.9 %) | 78 (52.7%) |        |        |
|                    | Outside IQR | 27 (52.9 %) | 84 (56.8%) | 0.7439 | 0.9999 |
|                    | Within IQR  | 24 (47.1%)  | 64 (43.2%) |        |        |
| T <sub>FM</sub>    | < median    | 25 (49.0%)  | 66 (44.6%) | 0.6268 | 0.9202 |
|                    | ≥ median    | 26 (51.0 %) | 82 (55.4%) |        |        |
|                    | Outside IQR | 26 (51.0 %) | 75 (50.7%) | 0.9999 | 0.9999 |
|                    | Within IQR  | 25 (49.0%)  | 73 (49.3%) |        |        |
| T <sub>max</sub>   | Outside IQR | 25 (49.0 %) | 84 (56.8%) | 0.5157 | 0.8165 |
|                    | Within IQR  | 26 (510%)   | 64 (43.2%) |        |        |
| T <sub>peak1</sub> | Outside IQR | 26 (51.0 %) | 86 (58.1%) | 0.4152 | 0.8165 |
|                    | Within IQR  | 25 (49.0%)  | 62 (41.9)  |        |        |
| T <sub>peak2</sub> | < median    | 25 (49.0%)  | 53 (35.8%) | 0.1000 | 0.2714 |
|                    | ≥ median    | 26 (51.0 %) | 95 (64.2%) |        |        |
| Peak 1             | < median    | 25 (49.0%)  | 63 (42.6%) | 0.5135 | 0.8908 |
|                    | ≥ median    | 26 (51.0 %) | 85 (57.4%) |        |        |
|                    | Outside IQR | 26 (51.0 %) | 65 (43.9%) | 0.4176 | 0.8165 |
|                    | Within IQR  | 25 (49.0%)  | 83 (56.1%) |        |        |
| Peak 2             | < median    | 25 (49.0%)  | 67 (45.3%) | 0.7449 | 0.9202 |
|                    | ≥ median    | 26 (51.0 %) | 81 (54.7%) |        |        |
|                    | Outside IQR | 26 (51.0 %) | 77 (52.0%) | 0.9999 | 0.9999 |
|                    | Within IQR  | 25 (49.0%)  | 71 (48.0%) |        |        |
| Peak 3             | < median    | 25 (49.0%)  | 54 (36.5%) | 0.1360 | 0.3230 |
|                    | ≥ median    | 26 (51.0 %) | 94 (63.5%) |        |        |
|                    | Outside IQR | 26 (51.0 %) | 84 (56.8%) | 0.5157 | 0.8165 |
|                    | Within IQR  | 25 (49.0%)  | 64 (43.2%) |        |        |
| Peak 1/2           | < median    | 25 (49.0%)  | 64 (43.2%) | 0.5157 | 0.8908 |
|                    | ≥ median    | 26 (51.0 %) | 84 (56.8%) |        |        |
|                    | Outside IQR | 26 (51.0 %) | 75 (50.7%) | 0.9999 | 0.9999 |
|                    | Within IQR  | 25 (49.0%)  | 73 (49.3%) |        |        |
| Peak 1/3           | < median    | 25 (49.0%)  | 70 (47.3%) | 0.8718 | 0.9202 |
|                    | ≥ median    | 26 (51.0 %) | 78 (52.7%) |        |        |
|                    | Outside IQR | 26 (51.0 %) | 87 (58.8%) | 0.4127 | 0.8165 |
|                    | Within IQR  | 25 (49.0%)  | 61 (41.2%) |        |        |
| Peak 2/3           | < median    | 25 (49.0%)  | 95 (64.2%) | 0.0682 | 0.2160 |
|                    | ≥ median    | 26 (51.0 %) | 53 (35.8%) |        |        |
|                    | Outside IQR | 26 (51.0 %) | 75 (50.7%) | 0.9999 | 0.9999 |
|                    | Within IQR  | 25 (49.0%)  | 73 (49.3%) |        |        |
| PC1                | < median    | 25 (49.0%)  | 70 (47.3%) | 0.8718 | 0.9202 |
|                    | ≥ median    | 26 (51.0 %) | 78 (52.7%) |        |        |
|                    | Outside IQR | 26 (51.0 %) | 73 (49.3%) | 0.8720 | 0.9999 |
|                    | Within IQR  | 25 (49.0%)  | 75 (50.7)  |        |        |
| PC2                | Outside IQR | 26 (51.0 %) | 84 (56.8%) | 0.5157 | 0.8165 |
|                    | Within IQR  | 25 (49.0%)  | 64 (43.2)  |        |        |
| PC3                | < median    | 25 (49.0%)  | 78 (52.7%) | 0.7456 | 0.9202 |
|                    | ≥ median    | 26 (51.0 %) | 70 (47.3%) |        |        |
|                    | Outside IQR | 26 (51.0 %) | 94 (65.5%) | 0.1360 | 0.6460 |
|                    | Within IQR  | 25 (49.0%)  | 54 (34.5)  |        |        |
| PC4                | < median    | 25 (49.0%)  | 50 (33.8%) | 0.0654 | 0.2160 |
|                    | ≥ median    | 26 (51.0 %) | 98 (66.2%) |        |        |

|     |             |             |            |        |        |
|-----|-------------|-------------|------------|--------|--------|
|     | Outside IQR | 26 (51.0 %) | 97 (64.9%) |        |        |
|     | Within IQR  | 25 (49.0%)  | 51 (35.1%) | 0.0689 | 0.4364 |
| PC5 | < median    | 25 (49.0%)  | 74 (50.0%) |        |        |
|     | ≥ median    | 26 (51.0 %) | 74 (50.0%) | 0.7471 | 0.9202 |
| PC6 | < median    | 25 (49.0%)  | 96 (64.9%) |        |        |
|     | ≥ median    | 26 (51.0 %) | 52 (35.1%) | 0.0667 | 0.2160 |
|     | Outside IQR | 26 (51.0 %) | 92 (62.2%) |        |        |
|     | Within IQR  | 25 (49.0%)  | 56 (37.8%) | 0.1872 | 0.7114 |

Legend: <sup>1</sup>FDR, false discovery rate; IQR, interquartile range [Q1, Q3]; LC, lung cancer; PC, principal component.

**Table S5.** Summary of the *p*-values for repeated measures ANOVA and Tukey's multiple comparisons. Tests evaluate differences between clinical groups using mass spectrometry glycosylation data of peptides grouped according to protein function.

| IMMUNOGLOBULINS                   |       |                            |         |        |         |                                           |         |        |
|-----------------------------------|-------|----------------------------|---------|--------|---------|-------------------------------------------|---------|--------|
| ANOVA summary                     |       | Unadjusted <i>p</i> -value |         |        |         | FDR <sup>1</sup> adjusted <i>p</i> -value |         |        |
|                                   |       | <0.0001                    |         |        |         | 0.0002                                    |         |        |
| Tukey's multiple comparison tests |       |                            |         |        |         |                                           |         |        |
|                                   |       | Control                    | AC      |        | SCC     |                                           | SCLC    |        |
|                                   |       |                            | Early   | Late   | Early   | Late                                      | Lim     | Ext    |
| Control                           |       | X                          | 0.0026  | ns     | <0.0001 | ns                                        | <0.0001 | ns     |
| AC                                | Early | 0.0026                     | X       | ns     | ns      | <0.0001                                   | 0.0025  | ns     |
|                                   | Late  | ns                         | ns      | X      | 0.0151  | 0.0288                                    | 0.0003  | ns     |
| SCC                               | Early | <0.0001                    | ns      | 0.0151 | X       | <0.0001                                   | ns      | ns     |
|                                   | Late  | ns                         | <0.0001 | 0.0288 | <0.0001 | X                                         | <0.0001 | 0.0338 |
| SCLC                              | Lim   | <0.0001                    | 0.0025  | 0.0003 | ns      | <0.0001                                   | X       | ns     |
|                                   | Ext   | ns                         | ns      | ns     | ns      | 0.0338                                    | ns      | X      |
| COMPLEMENT C3                     |       |                            |         |        |         |                                           |         |        |
| ANOVA summary                     |       | Unadjusted <i>p</i> -value |         |        |         | FDR <sup>1</sup> adjusted <i>p</i> -value |         |        |
|                                   |       | 0.1028                     |         |        |         | 0.1308                                    |         |        |
| Tukey's multiple comparison tests |       |                            |         |        |         |                                           |         |        |
|                                   |       | Control                    | AC      |        | SCC     |                                           | SCLC    |        |
|                                   |       |                            | Early   | Late   | Early   | Late                                      | Lim     | Ext    |
| Control                           |       | X                          | ns      | ns     | ns      | 0.0205                                    | 0.0005  | 0.0004 |
| AC                                | Early | ns                         | X       | ns     | ns      | ns                                        | ns      | ns     |
|                                   | Late  | ns                         | ns      | X      | ns      | ns                                        | ns      | ns     |
| SCC                               | Early | ns                         | ns      | ns     | X       | ns                                        | ns      | 0.0454 |
|                                   | Late  | 0.0205                     | ns      | ns     | ns      | X                                         | ns      | ns     |
| SCLC                              | Lim   | 0.0005                     | ns      | ns     | ns      | ns                                        | X       | ns     |
|                                   | Ext   | 0.0004                     | ns      | ns     | 0.0454  | ns                                        | ns      | X      |
| COMPLEMENT C4                     |       |                            |         |        |         |                                           |         |        |
| ANOVA summary                     |       | Unadjusted <i>p</i> -value |         |        |         | FDR <sup>1</sup> adjusted <i>p</i> -value |         |        |
|                                   |       | 0.1358                     |         |        |         | 0.1584                                    |         |        |
| Tukey's multiple comparison tests |       |                            |         |        |         |                                           |         |        |
|                                   |       | Control                    | AC      |        | SCC     |                                           | SCLC    |        |
|                                   |       |                            | Early   | Late   | Early   | Late                                      | Lim     | Ext    |
| Control                           |       | X                          | ns      | ns     | ns      | ns                                        | ns      | ns     |
| AC                                | Early | ns                         | X       | ns     | ns      | ns                                        | ns      | ns     |
|                                   | Late  | ns                         | ns      | X      | ns      | ns                                        | ns      | ns     |
| SCC                               | Early | ns                         | ns      | ns     | X       | ns                                        | ns      | ns     |
|                                   | Late  | ns                         | ns      | ns     | ns      | X                                         | ns      | ns     |
| SCLC                              | Lim   | ns                         | ns      | ns     | ns      | X                                         | ns      |        |

|                                   |       |                            |         |         |         |                                           |         |         |
|-----------------------------------|-------|----------------------------|---------|---------|---------|-------------------------------------------|---------|---------|
| Ext                               |       | ns                         | ns      | ns      | ns      | ns                                        | ns      | X       |
| ALPHA-2-MACROGLOBULIN             |       |                            |         |         |         |                                           |         |         |
| ANOVA summary                     |       | Unadjusted <i>p</i> -value |         |         |         | FDR <sup>1</sup> adjusted <i>p</i> -value |         |         |
|                                   |       | <0.0001                    |         |         |         | 0.0002                                    |         |         |
| Tukey's multiple comparison tests |       |                            |         |         |         |                                           |         |         |
| Control                           |       | AC                         |         | SCC     |         | SCLC                                      |         |         |
|                                   |       | Early                      | Late    | Early   | Late    | Lim                                       | Ext     |         |
| Control                           |       | X                          | ns      | 0.0147  | ns      | ns                                        | 0.0109  | 0.0250  |
| AC                                | Early | ns                         | X       | 0.0143  | ns      | ns                                        | ns      | 0.0464  |
|                                   | Late  | 0.0147                     | 0.0143  | X       | 0.0004  | ns                                        | <0.0001 | 0.0002  |
| SCC                               | Early | ns                         | ns      | 0.0004  | X       | 0.0300                                    | ns      | ns      |
|                                   | Late  | ns                         | ns      | ns      | 0.0300  | X                                         | 0.0005  | 0.0012  |
| SCLC                              | Lim   | 0.0109                     | ns      | <0.0001 | ns      | 0.0005                                    | X       | ns      |
|                                   | Ext   | 0.0250                     | 0.0464  | 0.0002  | ns      | 0.0120                                    | ns      | X       |
| BETA-2 GLYCOPROTEIN 1             |       |                            |         |         |         |                                           |         |         |
| ANOVA summary                     |       | Unadjusted <i>p</i> -value |         |         |         | FDR <sup>1</sup> adjusted <i>p</i> -value |         |         |
|                                   |       | 0.0019                     |         |         |         | 0.0030                                    |         |         |
| Tukey's multiple comparison tests |       |                            |         |         |         |                                           |         |         |
| Control                           |       | AC                         |         | SCC     |         | SCLC                                      |         |         |
|                                   |       | Early                      | Late    | Early   | Late    | Lim                                       | Ext     |         |
| Control                           |       | X                          | ns      | ns      | 0.0049  | ns                                        | ns      | ns      |
| AC                                | Early | ns                         | X       | ns      | ns      | ns                                        | ns      | ns      |
|                                   | Late  | ns                         | ns      | X       | 0.0012  | ns                                        | ns      | ns      |
| SCC                               | Early | 0.0049                     | ns      | 0.0012  | X       | ns                                        | ns      | ns      |
|                                   | Late  | ns                         | ns      | ns      | ns      | X                                         | ns      | ns      |
| SCLC                              | Lim   | ns                         | ns      | ns      | ns      | ns                                        | X       | ns      |
|                                   | Ext   | ns                         | ns      | ns      | ns      | ns                                        | ns      | X       |
| HAPTOGLOBIN                       |       |                            |         |         |         |                                           |         |         |
| ANOVA summary                     |       | Unadjusted <i>p</i> -value |         |         |         | FDR <sup>1</sup> adjusted <i>p</i> -value |         |         |
|                                   |       | <0.0001                    |         |         |         | 0.0002                                    |         |         |
| Tukey's multiple comparison tests |       |                            |         |         |         |                                           |         |         |
| Control                           |       | AC                         |         | SCC     |         | SCLC                                      |         |         |
|                                   |       | Early                      | Late    | Early   | Late    | Lim                                       | Ext     |         |
| Control                           |       | X                          | <0.0001 | <0.0001 | <0.0001 | <0.0001                                   | <0.0001 | 0.0005  |
| AC                                | Early | <0.0001                    | X       | ns      | ns      | ns                                        | ns      | ns      |
|                                   | Late  | <0.0001                    | ns      | X       | ns      | ns                                        | ns      | ns      |
| SCC                               | Early | <0.0001                    | ns      | ns      | X       | ns                                        | ns      | ns      |
|                                   | Late  | <0.0001                    | ns      | ns      | ns      | X                                         | ns      | ns      |
| SCLC                              | Lim   | <0.0001                    | ns      | ns      | ns      | ns                                        | X       | ns      |
|                                   | Ext   | 0.0005                     | ns      | ns      | ns      | ns                                        | ns      | X       |
| ALBUMIN                           |       |                            |         |         |         |                                           |         |         |
| ANOVA summary                     |       | Unadjusted <i>p</i> -value |         |         |         | FDR <sup>1</sup> adjusted <i>p</i> -value |         |         |
|                                   |       | <0.0001                    |         |         |         | 0.0002                                    |         |         |
| Tukey's multiple comparison tests |       |                            |         |         |         |                                           |         |         |
| Control                           |       | AC                         |         | SCC     |         | SCLC                                      |         |         |
|                                   |       | Early                      | Late    | Early   | Late    | Lim                                       | Ext     |         |
| Control                           |       | X                          | ns      | 0.0059  | <0.0001 | <0.0001                                   | 0.0002  | <0.0001 |
| AC                                | Early | ns                         | X       | ns      | 0.0056  | ns                                        | ns      | 0.0018  |
|                                   | Late  | 0.0059                     | ns      | X       | ns      | ns                                        | ns      | 0.0006  |
| SCC                               | Early | <0.0001                    | 0.0056  | ns      | X       | 0.0232                                    | ns      | ns      |
|                                   | Late  | <0.0001                    | ns      | ns      | 0.0232  | X                                         | ns      | 0.0014  |

|                                   |       |                            |         |        |         |                                           |        |        |
|-----------------------------------|-------|----------------------------|---------|--------|---------|-------------------------------------------|--------|--------|
| SCLC                              | Lim   | 0.0002                     | ns      | ns     | ns      | ns                                        | X      | 0.0045 |
|                                   | Ext   | <0.0001                    | 0.0018  | 0.0006 | ns      | 0.0014                                    | 0.0045 | X      |
| SEROTRANSFERRIN                   |       |                            |         |        |         |                                           |        |        |
| ANOVA summary                     |       | Unadjusted <i>p</i> -value |         |        |         | FDR <sup>1</sup> adjusted <i>p</i> -value |        |        |
|                                   |       | <0.0001                    |         |        |         | 0.0002                                    |        |        |
| Tukey's multiple comparison tests |       |                            |         |        |         |                                           |        |        |
| Control                           |       | AC                         |         | SCC    |         | SCLC                                      |        |        |
|                                   |       | Early                      | Late    | Early  | Late    | Lim                                       | Ext    |        |
| Control                           |       | X                          | 0.0287  | 0.0018 | <0.0001 | <0.0001                                   | 0.0006 | 0.0450 |
| AC                                | Early | 0.0287                     | X       | ns     | <0.0001 | 0.0068                                    | ns     | ns     |
|                                   | Late  | 0.0018                     | ns      | X      | ns      | ns                                        | ns     | ns     |
| SCC                               | Early | <0.0001                    | <0.0001 | ns     | X       | ns                                        | ns     | ns     |
|                                   | Late  | <0.0001                    | 0.0068  | ns     | ns      | X                                         | ns     | 0.0240 |
| SCLC                              | Lim   | 0.0006                     | ns      | ns     | ns      | ns                                        | X      | ns     |
|                                   | Ext   | 0.0450                     | ns      | ns     | ns      | 0.0240                                    | ns     | X      |
| HEMOPEXIN                         |       |                            |         |        |         |                                           |        |        |
| ANOVA summary                     |       | Unadjusted <i>p</i> -value |         |        |         | FDR <sup>1</sup> adjusted <i>p</i> -value |        |        |
|                                   |       | 0.1528                     |         |        |         | 0.1646                                    |        |        |
| Tukey's multiple comparison tests |       |                            |         |        |         |                                           |        |        |
| Control                           |       | AC                         |         | SCC    |         | SCLC                                      |        |        |
|                                   |       | Early                      | Late    | Early  | Late    | Lim                                       | Ext    |        |
| Control                           |       | X                          | ns      | 0.0093 | ns      | 0.0482                                    | 0.0168 | ns     |
| AC                                | Early | ns                         | X       | 0.0356 | ns      | ns                                        | 0.0140 | ns     |
|                                   | Late  | 0.0093                     | 0.0356  | X      | ns      | ns                                        | ns     | ns     |
| SCC                               | Early | ns                         | ns      | ns     | X       | ns                                        | ns     | ns     |
|                                   | Late  | 0.0482                     | ns      | ns     | ns      | X                                         | ns     | ns     |
| SCLC                              | Lim   | 0.0168                     | 0.0140  | ns     | ns      | ns                                        | X      | ns     |
|                                   | Ext   | ns                         | ns      | ns     | ns      | ns                                        | ns     | X      |
| APOLIPOPROTEIN B100               |       |                            |         |        |         |                                           |        |        |
| ANOVA summary                     |       | Unadjusted <i>p</i> -value |         |        |         | FDR <sup>1</sup> adjusted <i>p</i> -value |        |        |
|                                   |       | 0.0317                     |         |        |         | 0.0444                                    |        |        |
| Tukey's multiple comparison tests |       |                            |         |        |         |                                           |        |        |
| Control                           |       | AC                         |         | SCC    |         | SCLC                                      |        |        |
|                                   |       | Early                      | Late    | Early  | Late    | Lim                                       | Ext    |        |
| Control                           |       | X                          | ns      | ns     | ns      | ns                                        | ns     | ns     |
| AC                                | Early | ns                         | X       | ns     | ns      | ns                                        | ns     | ns     |
|                                   | Late  | ns                         | ns      | X      | ns      | ns                                        | ns     | ns     |
| SCC                               | Early | ns                         | ns      | ns     | X       | ns                                        | ns     | ns     |
|                                   | Late  | ns                         | ns      | ns     | ns      | X                                         | ns     | ns     |
| SCLC                              | Lim   | ns                         | ns      | ns     | ns      | ns                                        | X      | ns     |
|                                   | Ext   | ns                         | ns      | ns     | ns      | ns                                        | ns     | X      |
| ALPHA 1-ANTICHYMOTRYPSIN          |       |                            |         |        |         |                                           |        |        |
| ANOVA summary                     |       | Unadjusted <i>p</i> -value |         |        |         | FDR <sup>1</sup> adjusted <i>p</i> -value |        |        |
|                                   |       | 0.5038                     |         |        |         | 0.5038                                    |        |        |
| Tukey's multiple comparison tests |       |                            |         |        |         |                                           |        |        |
| Control                           |       | AC                         |         | SCC    |         | SCLC                                      |        |        |
|                                   |       | Early                      | Late    | Early  | Late    | Lim                                       | Ext    |        |
| Control                           |       | X                          | ns      | ns     | ns      | ns                                        | ns     | ns     |
| AC                                | Early | ns                         | X       | ns     | ns      | ns                                        | ns     | ns     |
|                                   | Late  | ns                         | ns      | X      | ns      | ns                                        | ns     | ns     |
| SCC                               | Early | ns                         | ns      | ns     | X       | ns                                        | ns     | ns     |
|                                   | Late  | ns                         | ns      | ns     | ns      | X                                         | ns     | ns     |
| SCLC                              | Lim   | ns                         | ns      | ns     | ns      | ns                                        | X      | ns     |
|                                   | Ext   | ns                         | ns      | ns     | ns      | ns                                        | ns     | X      |

|      |      |    |    |    |    |    |    |    |
|------|------|----|----|----|----|----|----|----|
|      | Late | ns | ns | ns | ns | X  | ns | ns |
| SCLC | Lim  | ns | ns | ns | ns | ns | X  | ns |
|      | Ext  | ns | ns | ns | ns | ns | ns | X  |

Legend: <sup>1</sup>FDR, false discovery rate; AC, adenocarcinoma; Early, early-stage (stages 1–3a); Ext, extensive (late-stage); Late, late-stage (stages 3b–4); Lim, limited (early-stage); ns, not statistically significant at the 5% level; SCC, squamous cell carcinoma; SCLC, small cell lung cancer.
