# Supplementary material for: The Utility of Differential Scanning Calorimetry Curves of Blood Plasma for Diagnosis, Subtype Differentiation and Predicted Survival in Lung Cancer
Source: Cancers (Basel). 2021 Oct 23;13(21):5326. doi: 10.3390/cancers13215326 (PMC8582427; doi:10.3390/cancers13215326)
Supplement: Supplementary file 1 [file cancers-13-05326-s001.zip › cancers-1388000 -supplementary-10.26-author confirmation/cancers-1388000-Supplementary Table S2 FINAL 10-22-2021.xls]

## Sheet: Legend
This file contains the DSC curves of plasma specimens for all 199 patients (148 lung cancer, 51 control) included in this study. Each column contains DSC data for a given subject at a given temperature.
Subject.ID: A unique identifier for each subject
Temperature: Temperature (in degrees Celsius)
DSC: DSC curve value in cal/°C.g

## Sheet: DSC curves LC and controls
Subject.ID: Temp. (° C):	C1	C2	C3	C4	C5	C6	C7	C8	C9	C10	C11	C12	C13	C14	C15	C16	C17	C18	C19	C20	C21	C22	C23	C24	C25	C26	C27	C28	C29	C30	C31	C32	C33	C34	C35	C36	C37	C38	C39	C40	C41	C42	C43	C44	C45	C46	C47	C48	C49
45	-0.00258	0.000664	-0.00119	-0.00656	-0.000964	-0.0015	-0.00357	-0.0023	-0.00178	-0.00128	-4.08e-05	0.000211	-0.0028	-0.00785	0.000625	0.00148	-0.000614	-8.21e-05	-0.000693	0.000171	0.000563	0.00118	0.00185	0.000936	-3.53e-05	-0.000315	-0.000574	-0.00097	-0.000287	-0.000406	0.000476	0.000298	-1.04e-06	-0.0014	-0.00029	0.000387	0.000408	-0.000463	0.000344	0.00165	0.00115	0.000664	-9.37e-05	-0.00155	-0.00139	-0.00256	-0.000792	0.000327	0.000632
45.1	-0.00273	0.000665	-0.00118	-0.00684	-0.000959	-0.00148	-0.00381	-0.00229	-0.00171	-0.00119	-4.46e-05	9.54e-05	-0.00284	-0.00672	0.000544	0.00144	-0.000705	-0.000106	-0.00071	-1.45e-05	0.000588	0.00123	0.0019	0.00106	7.55e-05	-0.000268	-0.000547	-0.000402	-0.000269	-0.000468	0.000398	0.000236	2.11e-06	-0.00137	-0.000246	0.000336	0.000397	-0.000456	0.000351	0.00159	0.00107	0.000525	-0.00014	-0.00172	-0.00147	-0.00267	-0.000888	0.000403	0.000573
45.2	-0.00284	0.000696	-0.00115	-0.00694	-0.000951	-0.00142	-0.00396	-0.00225	-0.00161	-0.00108	-2.45e-05	-3.69e-05	-0.00277	-0.00586	0.000489	0.00138	-0.000754	-0.000121	-0.000729	-0.000164	0.000597	0.00128	0.00195	0.00115	0.000195	-0.00025	-0.000499	0.000148	-0.000243	-0.000493	0.000337	0.000184	-6.2e-06	-0.00137	-0.000219	0.000222	0.000355	-0.000438	0.000375	0.00153	0.00099	0.000502	-0.000195	-0.00191	-0.0016	-0.00279	-0.00095	0.000477	0.000505
45.3	-0.00295	0.000739	-0.00112	-0.00696	-0.000918	-0.00136	-0.00406	-0.00213	-0.00149	-0.000972	1.52e-06	-0.0002	-0.00255	-0.00584	0.000482	0.00132	-0.000787	-0.000154	-0.000758	-0.000292	0.000572	0.0013	0.00206	0.0012	0.000293	-0.000235	-0.000459	0.000651	-0.000216	-0.000475	0.000294	0.00018	-2.97e-05	-0.00137	-0.000236	6.68e-05	0.000286	-0.000443	0.000389	0.00147	0.000899	0.000452	-0.000246	-0.00208	-0.00172	-0.0029	-0.000977	0.000539	0.000434
45.4	-0.00307	0.000771	-0.00109	-0.00689	-0.000858	-0.00131	-0.0041	-0.00189	-0.00137	-0.000849	4.4e-05	-0.000371	-0.00219	-0.0058	0.00052	0.00126	-0.000816	-0.000183	-0.00079	-0.000403	0.000537	0.00128	0.00219	0.00121	0.000369	-0.000214	-0.000425	0.000917	-0.000189	-0.000452	0.000331	0.000191	-7.14e-05	-0.00142	-0.000246	-0.000113	0.000187	-0.000445	0.000387	0.00142	0.000822	0.000377	-0.000278	-0.00222	-0.00179	-0.003	-0.000989	0.000615	0.000388
45.5	-0.00319	0.0008	-0.00104	-0.00664	-0.00081	-0.00127	-0.0042	-0.00144	-0.00128	-0.000699	-0.000103	-0.000526	-0.00169	-0.00567	0.000613	0.00119	-0.000827	-0.000203	-0.000816	-0.000502	0.000489	0.00126	0.00241	0.00118	0.00043	-0.00021	-0.000389	-0.000944	-0.000146	-0.000422	0.000404	0.000229	-0.000112	-0.0015	-0.000254	-0.000298	6.82e-05	-0.000453	0.000388	0.00136	0.000754	0.000291	-0.0003	-0.00233	-0.00187	-0.0031	-0.000973	0.000674	0.000362
45.6	-0.00328	0.000829	-0.000991	-0.0062	-0.000755	-0.00124	-0.00428	-0.00102	-0.00117	-0.000568	-0.000366	-0.000687	-0.00117	-0.00549	0.000849	0.00114	-0.000829	-0.000196	-0.000839	-0.000569	0.000455	0.00122	0.00259	0.00115	0.000459	-0.000221	-0.000356	-0.00174	-0.000104	-0.000356	0.000484	0.000244	-0.000155	-0.0016	-0.00026	-0.000455	-5.94e-05	-0.000481	0.00037	0.00129	0.000689	0.00033	-0.000342	-0.00245	-0.00194	-0.00318	-0.000978	0.000702	0.000346
45.7	-0.00337	0.000858	-0.000907	-0.00554	-0.000704	-0.0012	-0.00431	-0.000622	-0.00105	-0.000465	-0.000539	-0.000806	-0.000711	-0.00533	0.00125	0.0011	-0.000817	-0.000176	-0.000831	-0.000583	0.000426	0.00117	0.00274	0.00108	0.000472	-0.000225	-0.000325	-0.00229	-5.89e-05	-0.000276	0.000538	0.000238	-0.00018	-0.00164	-0.000257	-0.000594	-0.000184	-0.000523	0.000342	0.00122	0.000628	0.000374	-0.000394	-0.00251	-0.00202	-0.00328	-0.000951	0.000737	0.000367
45.8	-0.00341	0.000834	-0.000831	-0.00477	-0.000678	-0.00112	-0.0044	-0.000256	-0.000941	-0.000365	-0.00063	-0.000895	-0.000385	-0.00518	0.00164	0.00107	-0.000808	-0.000115	-0.000802	-0.000567	0.000412	0.00113	0.00292	0.000999	0.000468	-0.000237	-0.000279	-0.0026	-1.41e-05	-0.000216	0.000553	0.00025	-0.000192	-0.00169	-0.000227	-0.000725	-0.000289	-0.000575	0.000302	0.00114	0.00056	0.000373	-0.000445	-0.00251	-0.00214	-0.00332	-0.000956	0.00077	0.000377
45.9	-0.0034	0.000611	-0.000768	-0.004	-0.00067	-0.00109	-0.00432	7.65e-05	-0.00085	-0.000283	-0.000656	-0.001	-7.61e-05	-0.00503	0.0017	0.00103	-0.000814	-3.27e-05	-0.000745	-0.000523	0.000379	0.00107	0.00308	0.000908	0.000452	-0.000247	-0.000214	-0.00273	2.55e-05	-0.00017	0.00056	0.000274	-0.000193	-0.00171	-0.000176	-0.000827	-0.000391	-0.000631	0.000255	0.00108	0.000495	0.000331	-0.000483	-0.00243	-0.00222	-0.00336	-0.000973	0.000755	0.000363
46	-0.00333	0.000367	-0.000713	-0.00326	-0.000649	-0.00103	-0.00423	0.000311	-0.000775	-0.00023	-0.000658	-0.00112	0.000333	-0.0049	0.00128	0.00101	-0.000814	5.52e-05	-0.000673	-0.00047	0.000349	0.000993	0.00321	0.000825	0.000423	-0.000263	-0.000174	-0.00275	7.6e-05	-0.000127	0.000601	0.000316	-0.0002	-0.00169	-0.000122	-0.000919	-0.000467	-0.000682	0.000191	0.00102	0.000444	0.000286	-0.0005	-0.00234	-0.00225	-0.00339	-0.000987	0.000723	0.000336
46.1	-0.00322	0.000185	-0.00066	-0.00252	-0.000587	-0.000952	-0.00405	-0.000297	-0.000725	-0.000179	-0.000637	-0.00121	0.000779	-0.00475	0.000943	0.000996	-0.000824	0.000138	-0.000596	-0.000418	0.000332	0.0009	0.00331	0.000751	0.000382	-0.000256	-0.000125	-0.00267	0.00013	-6.4e-05	0.000655	0.000321	-0.000196	-0.00164	-6.18e-05	-0.000979	-0.000525	-0.000737	0.000133	0.000951	0.000394	0.000238	-0.000505	-0.00233	-0.00224	-0.00344	-0.000983	0.000696	0.000301
46.2	-0.00309	7.85e-05	-0.000611	-0.00178	-0.00052	-0.000875	-0.00381	-0.00142	-0.000664	-0.000133	-0.000612	-0.0013	7.31e-05	-0.00454	0.000654	0.000982	-0.000821	0.000227	-0.000529	-0.000358	0.000319	0.000813	0.00336	0.00068	0.000343	-0.000251	-5.93e-05	-0.00241	0.000197	9.71e-06	0.000712	0.000272	-0.000186	-0.00156	1.04e-05	-0.00102	-0.000552	-0.000794	8.65e-05	0.000886	0.000351	0.000181	-0.000419	-0.00229	-0.00221	-0.00348	-0.00097	0.000681	0.000242
46.3	-0.00298	4.59e-05	-0.000554	-0.00118	-0.00042	-0.000773	-0.00352	-0.00179	-0.000617	-8.98e-05	-0.000559	-0.00139	-0.000528	-0.00425	0.000405	0.000957	-0.000848	0.000318	-0.000466	-0.000304	0.000299	0.000727	0.00339	0.000621	0.000274	-0.000239	1.07e-05	-0.00196	0.000259	6.46e-05	0.000783	9.53e-05	-0.000188	-0.00124	7.19e-05	-0.00103	-0.000566	-0.000868	3.46e-05	0.000823	0.000304	0.000127	-0.000238	-0.00225	-0.00219	-0.00347	-0.000946	0.000679	0.000181
46.4	-0.00291	6.35e-05	-0.000497	-0.000648	-0.000307	-0.000644	-0.00319	-0.00201	-0.000564	-5.84e-05	-0.000489	-0.00138	-0.000698	-0.00383	0.000211	0.000917	-0.000861	0.000379	-0.000407	-0.000279	0.00026	0.000648	0.00348	0.000568	0.000227	-0.000223	7.12e-05	-0.00132	0.000313	0.000113	0.000855	-0.000199	-0.000198	-0.000921	0.000113	-0.00102	-0.000569	-0.00101	-2.09e-05	0.000761	0.000261	5.86e-05	-0.000148	-0.00222	-0.00213	-0.00352	-0.000897	0.000678	0.000124
46.5	-0.00283	0.000102	-0.000429	-0.000172	-0.000154	-0.000499	-0.00285	-0.0021	-0.000507	-1.12e-05	-0.000425	-0.00128	-0.000763	-0.00328	7.41e-05	0.000883	-0.000867	0.000425	-0.000373	-0.000279	0.00022	0.000568	0.00355	0.000526	0.000196	-0.000187	0.000146	-0.000422	0.000344	0.000161	0.000924	-0.000547	-0.0002	-0.00067	0.00015	-0.00101	-0.000556	-0.00111	-6.79e-05	0.0007	0.00022	-3.32e-05	-0.00014	-0.0022	-0.00206	-0.00358	-0.000821	0.000414	7.26e-05
46.6	-0.0027	0.000153	-0.000377	0.000266	-2.34e-05	-0.000367	-0.0025	-0.00215	-0.000421	4.44e-05	-0.000358	-0.00127	-0.000755	-0.00285	-3.42e-05	0.000851	-0.000872	0.000467	-0.000359	-0.000288	0.000158	0.00048	0.00367	0.00049	0.000175	-0.00014	0.000201	0.00044	0.000369	0.000196	0.000962	-0.000844	-0.00023	-0.00053	0.000172	-0.000993	-0.000537	-0.0012	-0.00012	0.000636	0.00019	-0.000134	-0.000139	-0.00216	-0.00199	-0.00365	-0.000768	0.000221	3.2e-05
46.7	-0.00261	0.000203	-0.000323	-0.00256	7.68e-05	-0.000247	-0.0022	-0.00216	-0.000336	7.55e-05	-0.000295	-0.00132	-0.000734	-0.00257	-0.000114	0.000812	-0.000883	0.000484	-0.000361	-0.000291	0.000108	0.000392	0.00381	0.000467	0.000145	-0.000117	0.000256	0.00132	0.000366	0.000136	0.000985	-0.00118	-0.000253	-0.000469	0.000182	-0.000967	-0.000503	-0.00126	-0.000178	0.00056	0.000153	-0.000235	-0.000205	-0.00214	-0.00194	-0.00367	-0.000715	5.08e-05	-9.72e-06
46.8	-0.00255	0.000228	-0.000301	-0.00333	0.000126	-0.000141	-0.00201	-0.00207	-0.000253	9.05e-05	-0.000236	-0.00137	-0.000674	-0.00287	-0.000136	0.000761	-0.000897	0.00041	-0.000427	-0.000305	7.16e-05	0.000319	0.00393	0.000445	9.74e-05	-0.000101	0.000292	0.00216	0.000324	1.03e-05	0.00101	-0.00147	-0.000284	-0.000452	0.000177	-0.000936	-0.000462	-0.00129	-0.000332	0.000464	2.91e-05	-0.000479	-0.000254	-0.00207	-0.00191	-0.00367	-0.000698	-9.73e-05	-1.61e-05
46.9	-0.00249	0.000233	-0.000298	-0.00361	0.000152	-7.16e-05	-0.00189	-0.00184	-0.000166	9.25e-05	-0.000196	-0.00143	-0.000519	-0.00296	-5.33e-05	0.000715	-0.000895	0.000324	-0.000512	-0.000331	4.4e-05	0.000251	0.00404	0.000424	6.13e-05	-8.63e-05	0.000318	0.00276	0.000253	-0.000147	0.000994	-0.0017	-0.000314	-0.000459	0.000172	-0.000897	-0.000407	-0.00129	-0.000496	0.000383	-7.26e-05	-0.000713	-0.000336	-0.00195	-0.00193	-0.00369	-0.000692	-0.000226	-7.45e-06
47	-0.0024	0.000226	-0.000321	-0.0037	0.000167	-5.65e-05	-0.00185	-0.00155	-5.53e-05	5.31e-05	-0.00017	-0.00148	-0.000293	-0.00293	0.000179	0.000682	-0.000903	0.000242	-0.000584	-0.00037	3.86e-05	0.000186	0.00422	0.00041	1.51e-05	-9.38e-05	0.000309	0.000879	0.000176	-0.000315	0.000977	-0.00187	-0.000361	-0.000496	0.000162	-0.000849	-0.000335	-0.00128	-0.000647	0.000323	-0.000149	-0.000916	-0.000418	-0.0018	-0.00194	-0.00369	-0.000643	-0.00033	1.38e-05
47.1	-0.00226	0.000201	-0.000349	-0.00376	0.000177	-6.35e-05	-0.00184	-0.00131	4.92e-05	1.09e-05	-0.000218	-0.00151	-3.65e-05	-0.00287	0.000499	0.00065	-0.000898	0.000192	-0.000625	-0.000431	2.55e-05	0.000109	0.00439	0.00034	-2.8e-05	-0.000112	0.000278	0.000129	7.69e-05	-0.000488	0.000963	-0.00206	-0.000406	-0.000539	0.00014	-0.000781	-0.000274	-0.00126	-0.000774	0.000294	-0.000221	-0.0011	-0.00048	-0.00161	-0.00188	-0.00364	-0.000593	-0.000422	4.02e-05
47.2	-0.00213	0.00015	-0.000384	-0.00369	0.000165	-8.54e-05	-0.00189	-0.000935	0.000195	-5.03e-05	-0.000338	-0.00151	0.000272	-0.00283	0.000959	0.000574	-0.000873	0.000171	-0.000604	-0.000451	4.87e-05	3.82e-05	0.00461	0.000255	-7.71e-05	-0.000131	0.000248	-0.000321	-1.61e-05	-0.000673	0.000959	-0.00224	-0.000443	-0.000519	0.000107	-0.000716	-0.000205	-0.00118	-0.000873	0.000274	-0.000279	-0.00129	-0.000549	-0.00142	-0.00185	-0.00352	-0.000516	-0.000498	8.15e-05
47.3	-0.00197	7.96e-05	-0.000382	-0.00355	0.000131	-0.00011	-0.00193	-0.000308	0.000363	-0.00011	-0.000476	-0.00146	0.00072	-0.0027	0.0011	0.00051	-0.000822	0.000161	-0.000463	-0.000439	9.76e-05	-1.99e-05	0.00482	0.000144	-0.000116	-0.000138	0.000216	-0.000575	-0.0001	-0.000832	0.00098	-0.00241	-0.000466	-0.000477	7.63e-05	-0.000661	-0.000159	-0.0011	-0.001	0.000258	-0.000331	-0.00148	-0.000582	-0.00117	-0.00176	-0.00344	-0.000428	-0.000587	0.000119
47.4	-0.00183	2.42e-05	-0.000353	-0.00336	9.02e-05	-0.000159	-0.00197	0.000467	0.000504	-0.000177	-0.000618	-0.00133	0.00119	-0.00238	0.000586	0.000461	-0.00077	0.00017	-0.000195	-0.000412	0.000162	-6.38e-05	0.0051	-6.07e-06	-0.000131	-0.000188	0.000191	-0.000728	-0.000156	-0.000975	0.00106	-0.00256	-0.000485	-0.000419	5.71e-05	-0.000611	-0.000124	-0.00097	-0.00106	0.000267	-0.000297	-0.00162	-0.000578	-0.000815	-0.00169	-0.00336	-0.000325	-0.000654	0.000153
47.5	-0.00167	-4.13e-05	-0.000339	-0.00296	5.36e-05	-0.0002	-0.00203	0.0012	0.00069	-0.000253	-0.000733	-0.00114	0.00169	-0.00192	0.000155	0.000409	-0.000777	0.00017	0.000181	-0.000374	0.000206	-9.47e-05	0.00551	-0.000147	-0.000153	-0.000264	0.00016	-0.000846	-0.000201	-0.00112	0.0011	-0.00269	-0.000483	-0.000404	4.25e-05	-0.000636	-9.74e-05	-0.000819	-0.00106	0.000165	-0.000161	-0.00174	-0.000517	-0.000476	-0.00157	-0.00327	-0.00023	-0.000719	0.000179
47.6	-0.00151	-0.000132	-0.000344	-0.00238	2.95e-05	-0.000235	-0.0021	0.000633	0.000892	-0.00032	-0.000818	-0.000906	0.00223	-0.00143	-0.000169	0.000315	-0.000835	0.000161	0.000671	-0.000322	0.000198	-0.000113	0.00598	-0.000284	-0.000242	-0.000337	0.000108	-0.000878	-0.000208	-0.00126	0.00114	-0.00282	-0.000452	-0.00038	2.1e-05	-0.000702	-8.08e-05	-0.000625	-0.000946	0.00011	1.89e-05	-0.00179	-0.000468	-0.000162	-0.00142	-0.00318	-0.000146	-0.000753	0.000198
47.7	-0.00136	-0.000212	-0.000412	-0.00152	1.33e-05	-0.000263	-0.00225	0.000332	0.00112	-0.000362	-0.000665	-0.00061	0.00274	-0.000942	-0.00042	0.000207	-0.000913	0.000128	0.00113	-0.00027	0.000144	-0.000172	0.00644	-0.000401	-0.000337	-0.000431	6.71e-05	-0.000809	-0.000167	-0.00139	0.00125	-0.00293	-0.000452	-0.000307	8.44e-06	-0.000746	-5.67e-05	-0.00036	-0.000674	0.000105	0.000193	-0.00177	-0.00042	5.18e-05	-0.00118	-0.00312	-2.16e-05	-0.00075	0.000199
47.8	-0.00115	-0.000217	-0.00038	-0.000497	1.28e-05	-0.000297	-0.00249	0.000106	0.0014	-0.000407	-0.000553	-0.000306	0.00282	-0.0005	-0.000638	9.09e-05	-0.000992	6.57e-05	0.00157	-0.000173	6.34e-05	-0.000192	0.00686	-0.000516	-0.000413	-0.000511	5.48e-05	-0.000491	-0.000116	-0.0015	0.00136	-0.00301	-0.00037	-0.000228	1.11e-05	-0.000743	-3.51e-05	9.35e-05	-0.000264	0.000112	0.000375	-0.00165	-0.000371	0.000192	-0.000872	-0.00308	0.000183	-0.00073	0.000148
47.9	-0.000967	-0.000163	-0.000318	0.000627	3.13e-05	-0.000306	-0.00277	-4.62e-05	0.00167	-0.000465	-0.000513	-1.43e-05	0.00174	-0.000464	-0.0008	4.43e-05	-0.00106	-8.37e-06	0.00201	-9.11e-05	-4.91e-06	-0.000117	0.00722	-0.000596	-0.000435	-0.00059	5.4e-05	7.92e-05	-2.23e-05	-0.00161	0.00146	-0.00301	-0.000256	-0.000206	4.07e-05	-0.000696	-3.09e-06	0.000639	0.000368	0.000156	0.000624	-0.00142	-0.000263	0.000315	-0.000587	-0.00294	0.000448	-0.000691	5.53e-05
48	-0.000733	-9.41e-06	-0.000182	0.00172	9.49e-05	-0.000316	-0.00309	-0.000137	0.00198	-0.000527	-0.000435	0.00034	0.000734	-0.00103	-0.000879	2.82e-05	-0.00114	-8.11e-05	0.00244	2.42e-05	-2.7e-05	4.43e-05	0.0076	-0.000648	-0.000425	-0.000634	0.00011	0.000876	0.000109	-0.00171	0.00159	-0.00295	-0.000166	-9.94e-05	-1.55e-05	-0.000589	-5.48e-06	0.00116	0.00106	0.000199	0.000919	-0.00118	-0.000162	0.000452	-0.000325	-0.00279	0.000734	-0.000615	-2.92e-05
48.1	-0.000463	0.00018	3.22e-05	0.0027	0.000199	-0.000315	-0.00335	-0.000201	0.00239	-0.000622	-0.00029	0.00068	0.000178	-0.00118	-0.000844	3.73e-05	-0.0012	-0.000125	0.00284	0.000235	1.51e-05	0.000258	0.00805	-0.000666	-0.000374	-0.000647	0.00022	0.0017	0.000277	-0.00176	0.00173	-0.00251	-3.26e-05	1.01e-05	-6.49e-05	-0.00042	3.72e-06	0.00168	0.00158	0.000256	0.00127	-0.0007	-8.89e-05	0.000621	-9.72e-05	-0.00261	0.00106	-0.000491	-0.00012
48.2	-0.000182	0.000496	0.000248	0.00354	0.00035	-0.000336	-0.0035	-0.000103	0.0029	-0.000638	-0.000134	0.00104	2.96e-05	-0.00122	-0.000609	8.84e-05	-0.0013	-4.58e-05	0.00325	0.000499	0.000114	0.000546	0.00854	-0.000627	-0.000254	-0.000617	0.000432	0.00259	0.000405	-0.00177	0.00189	-0.00161	0.000232	0.000133	-8.18e-05	-0.000179	7.07e-05	0.00223	0.00199	0.000363	0.00162	-0.000111	7.18e-05	0.000788	0.000171	-0.00246	0.00144	-0.000307	-0.000235
48.3	0.000175	0.000864	0.000559	0.00429	0.000525	-0.000316	-0.00333	0.000181	0.00352	-0.000607	8.18e-05	0.00138	1.06e-05	-0.00116	-0.000139	0.000162	-0.00137	0.00023	0.0037	0.000808	0.000269	0.000922	0.00905	-0.000497	-9.35e-05	-0.000528	0.000751	0.00318	0.000543	-0.00174	0.00212	-0.000857	0.000623	0.000258	-8.03e-05	0.000145	0.000214	0.00282	0.00236	0.0005	0.00195	0.000354	0.000304	0.000961	0.000491	-0.00229	0.00182	-1.07e-05	-0.000325
48.4	0.000536	0.00129	0.000934	0.00348	0.000642	-0.000227	-0.00291	0.00086	0.00424	-0.000516	0.000371	0.00168	8.92e-05	-0.000996	0.000524	0.000246	-0.00137	0.000692	0.00418	0.00111	0.000503	0.00141	0.00959	-0.000342	9.52e-05	-0.00041	0.00113	0.00173	0.000753	-0.00166	0.00271	-0.000228	0.00113	0.000414	-1.19e-05	0.000522	0.000468	0.00355	0.00281	0.000682	0.0023	0.000936	0.000572	0.00117	0.000816	-0.00194	0.00233	0.000366	-0.000401
48.5	0.000925	0.00178	0.00132	0.00207	0.000843	-0.000136	-0.00235	0.00219	0.0051	-0.000364	0.000734	0.00201	0.000454	-0.00064	0.00123	0.000338	-0.00131	0.00125	0.00471	0.0014	0.00084	0.00202	0.01021	-0.000125	0.000314	-0.000237	0.00156	0.000915	0.00102	-0.00151	0.00351	0.000329	0.00169	0.000597	0.000164	0.000945	0.000832	0.0043	0.00335	0.000918	0.00275	0.00162	0.000877	0.00149	0.00116	-0.00142	0.00287	0.000752	-0.000439
48.6	0.00133	0.00226	0.0017	0.00173	0.00113	-8.81e-05	-0.00164	0.00355	0.00603	-0.000144	0.00114	0.00237	0.00117	-6.32e-05	0.00197	0.000442	-0.0012	0.00188	0.00529	0.00175	0.00136	0.00265	0.01083	0.000209	0.000525	-3.12e-06	0.00215	0.000487	0.00133	-0.00125	0.00424	0.000903	0.00234	0.000793	0.000445	0.00144	0.00132	0.00489	0.00385	0.00125	0.00322	0.00225	0.00116	0.00193	0.00149	-0.000973	0.00344	0.00117	-0.000432
48.7	0.00172	0.00276	0.00214	0.00183	0.00155	1.01e-05	-0.000964	0.00494	0.00695	0.000106	0.00157	0.00279	0.00204	0.000532	0.00248	0.000543	-0.00103	0.00264	0.00587	0.0021	0.00199	0.00332	0.01146	0.0006	0.000775	0.000311	0.00281	0.000273	0.00166	-0.000987	0.00494	0.00147	0.00303	0.000965	0.000801	0.00201	0.00193	0.00545	0.00435	0.00166	0.00368	0.00278	0.00143	0.0024	0.00185	-0.000429	0.00399	0.00157	-0.000398
48.8	0.00208	0.00341	0.00266	0.00203	0.00204	0.000138	-0.000426	0.00637	0.00782	0.000378	0.002	0.00322	0.00344	0.00155	0.00207	0.000674	-0.000845	0.00329	0.00647	0.00238	0.00267	0.00403	0.0121	0.00105	0.00109	0.000664	0.00356	0.000166	0.00204	-0.000664	0.00581	0.00197	0.0037	0.00114	0.00123	0.00261	0.00258	0.00605	0.00487	0.00207	0.00415	0.00324	0.00184	0.00281	0.00222	0.000206	0.00451	0.00197	-0.000315
48.9	0.00244	0.00413	0.00312	0.00231	0.0025	0.000356	6.13e-05	0.00776	0.00876	0.000793	0.00249	0.00361	0.00509	0.00271	0.00198	0.000841	-0.000616	0.00387	0.00716	0.00276	0.00339	0.00476	0.01271	0.00151	0.00154	0.00104	0.00434	0.000129	0.00259	-0.000266	0.00677	0.00266	0.00438	0.00151	0.00168	0.00325	0.00339	0.00671	0.00526	0.00256	0.00467	0.00371	0.00235	0.00317	0.00265	0.000848	0.00508	0.00246	-0.000191
49	0.00279	0.00488	0.00355	0.00267	0.00298	0.000759	0.000544	0.00753	0.00984	0.00131	0.00305	0.00396	0.00677	0.00406	0.00201	0.00109	-0.000341	0.00443	0.0079	0.00318	0.00416	0.00554	0.01345	0.00198	0.00204	0.00149	0.00518	0.000335	0.00327	0.000225	0.00778	0.0035	0.0051	0.00197	0.00209	0.00391	0.00425	0.00741	0.00555	0.00298	0.00525	0.00419	0.0029	0.00362	0.00316	0.00156	0.00563	0.00303	9.18e-07
49.1	0.0032	0.00566	0.00393	0.00323	0.00348	0.00142	0.00107	0.00756	0.01099	0.00189	0.00363	0.00474	0.00836	0.00543	0.0021	0.00147	-8.46e-06	0.00504	0.00899	0.00367	0.00487	0.00635	0.01419	0.0025	0.00255	0.00201	0.00603	0.00102	0.00402	0.000695	0.00876	0.00426	0.00589	0.00254	0.00249	0.0046	0.0051	0.00868	0.00589	0.00344	0.00583	0.0047	0.00357	0.00411	0.0037	0.0023	0.00612	0.00357	0.000301
49.2	0.00366	0.00646	0.00431	0.0046	0.00406	0.00242	0.00174	0.00773	0.01221	0.00247	0.0041	0.00595	0.00975	0.00624	0.0022	0.00197	0.000396	0.00572	0.01026	0.0042	0.00552	0.0071	0.01495	0.00299	0.0031	0.00266	0.00698	0.00212	0.0049	0.00119	0.00973	0.00494	0.00673	0.00312	0.00296	0.00531	0.00595	0.01006	0.00618	0.0039	0.00643	0.00541	0.00416	0.00471	0.0043	0.003	0.00663	0.00412	0.00071
49.3	0.0042	0.00732	0.00473	0.00639	0.00465	0.00353	0.003	0.00804	0.01345	0.00309	0.00461	0.0065	0.01058	0.00619	0.00238	0.00258	0.000901	0.00641	0.01122	0.00475	0.00615	0.00816	0.01581	0.0035	0.00371	0.00335	0.00788	0.00344	0.00585	0.00165	0.01068	0.00561	0.00767	0.00372	0.0035	0.00607	0.00677	0.01109	0.00651	0.00436	0.00707	0.00594	0.00486	0.00537	0.00497	0.00356	0.00723	0.00474	0.00116
49.4	0.00483	0.00818	0.00508	0.00826	0.00535	0.00456	0.00439	0.0084	0.0147	0.00382	0.00512	0.00684	0.01032	0.00653	0.0027	0.00332	0.00148	0.0072	0.01213	0.00526	0.00682	0.00987	0.01672	0.00401	0.00442	0.00404	0.00871	0.00491	0.00673	0.00216	0.01153	0.00654	0.00868	0.00443	0.00403	0.00685	0.00753	0.01197	0.00685	0.00479	0.00769	0.00644	0.00553	0.00617	0.00568	0.00414	0.0078	0.00542	0.00165
49.5	0.0055	0.009	0.0054	0.00977	0.00616	0.00563	0.00546	0.00884	0.01597	0.00451	0.00559	0.00712	0.0103	0.00692	0.00326	0.00412	0.002	0.00809	0.01317	0.0058	0.00747	0.01123	0.01771	0.00453	0.00511	0.00477	0.0095	0.00642	0.00753	0.00271	0.01236	0.00761	0.00974	0.0052	0.00446	0.00769	0.00829	0.01285	0.00722	0.00521	0.00836	0.00698	0.00608	0.00698	0.0063	0.00482	0.00843	0.0062	0.00219
49.6	0.00615	0.00985	0.00576	0.01107	0.00686	0.00684	0.00638	0.00964	0.01723	0.0051	0.00603	0.00735	0.01038	0.00735	0.00397	0.00493	0.00251	0.00902	0.01444	0.00633	0.0081	0.01204	0.01868	0.00508	0.0058	0.00546	0.01025	0.00799	0.00818	0.00321	0.01327	0.0088	0.01074	0.00618	0.00489	0.00848	0.00901	0.01373	0.00758	0.00565	0.00899	0.00744	0.00659	0.0076	0.00685	0.00542	0.00903	0.00701	0.00274
49.7	0.00673	0.01065	0.00618	0.0126	0.00757	0.00815	0.00709	0.01077	0.01847	0.00568	0.00641	0.00756	0.01054	0.00788	0.00496	0.00569	0.00304	0.00983	0.01607	0.00691	0.00877	0.01251	0.01957	0.00567	0.00655	0.00612	0.011	0.00926	0.00866	0.00361	0.01418	0.01012	0.01166	0.00752	0.00526	0.00918	0.0097	0.01466	0.00802	0.00609	0.00949	0.00783	0.00717	0.00813	0.00739	0.00604	0.00951	0.00779	0.00331
49.8	0.00733	0.01133	0.00669	0.01403	0.00834	0.00944	0.00757	0.01209	0.01967	0.00632	0.00684	0.00772	0.01077	0.00863	0.00583	0.00645	0.00362	0.0105	0.01782	0.00762	0.00947	0.01272	0.02026	0.00639	0.00729	0.00678	0.01186	0.00905	0.00915	0.00395	0.01498	0.01113	0.01241	0.00871	0.00564	0.00978	0.01034	0.01554	0.00852	0.0065	0.00998	0.00825	0.0079	0.00857	0.00791	0.00664	0.00998	0.00861	0.00387
49.9	0.00787	0.012	0.00733	0.00515	0.00919	0.01062	0.00787	0.01327	0.02075	0.00698	0.00726	0.00788	0.01115	0.00941	0.00671	0.00713	0.00416	0.01118	0.01909	0.00842	0.01018	0.01286	0.0209	0.00718	0.00796	0.00743	0.0128	0.00872	0.00963	0.00432	0.01565	0.01178	0.01313	0.00961	0.00607	0.01038	0.01095	0.01644	0.0092	0.00685	0.01047	0.00881	0.00868	0.00907	0.00842	0.0072	0.01047	0.00949	0.00437
50	0.00838	0.01266	0.00815	-0.00337	0.00992	0.01164	0.00817	0.01432	0.02175	0.0077	0.00772	0.00798	0.01174	0.0099	0.00757	0.00776	0.00465	0.01181	0.02018	0.00914	0.01088	0.01298	0.02166	0.00805	0.00859	0.00809	0.01373	0.00891	0.01012	0.00471	0.0163	0.01226	0.01387	0.01033	0.00654	0.01098	0.01146	0.01747	0.01001	0.00717	0.01103	0.01029	0.00953	0.00956	0.00905	0.00771	0.01103	0.01031	0.00483
50.1	0.00886	0.01337	0.00911	-0.00506	0.01045	0.01253	0.00839	0.01532	0.02261	0.00839	0.0082	0.0081	0.01244	0.00298	0.00795	0.00837	0.00504	0.01241	0.02098	0.00976	0.01158	0.01307	0.02246	0.00886	0.00922	0.00871	0.01469	0.0092	0.0106	0.00511	0.01692	0.01265	0.01457	0.01085	0.00703	0.01164	0.01189	0.01837	0.01078	0.00748	0.0117	0.01137	0.01027	0.01	0.00971	0.00825	0.01165	0.01111	0.00531
50.2	0.00941	0.01413	0.00998	-0.00606	0.01089	0.01335	0.00853	0.01579	0.02337	0.00899	0.00867	0.0083	0.01314	-0.00939	0.00753	0.00888	0.00534	0.01298	0.02162	0.01033	0.01228	0.01324	0.02315	0.00955	0.0098	0.00927	0.01556	0.00945	0.011	0.00549	0.01749	0.01306	0.0153	0.01126	0.00756	0.01229	0.01222	0.01918	0.01171	0.0078	0.01236	0.01274	0.01101	0.01035	0.01036	0.00876	0.01227	0.01187	0.00576
50.3	0.0099	0.01492	0.01076	-0.00669	0.01129	0.01413	0.00853	0.01515	0.02415	0.00969	0.00919	0.0086	0.014	-0.01197	0.00746	0.00931	0.00561	0.01359	0.02223	0.01085	0.01289	0.01353	0.02378	0.01013	0.01033	0.0098	0.01629	0.00979	0.01137	0.00585	0.01806	0.01348	0.0162	0.01162	0.00792	0.01286	0.01255	0.01993	0.01248	0.00822	0.01304	0.01366	0.0117	0.01064	0.01095	0.0092	0.01283	0.01264	0.00621
50.4	0.01029	0.01569	0.01133	-0.00642	0.0117	0.01475	0.0085	0.01473	0.02491	0.01039	0.00972	0.00899	0.01494	-0.01321	0.00741	0.00968	0.00586	0.01418	0.02275	0.01132	0.0134	0.01391	0.02436	0.01065	0.01081	0.01034	0.01695	0.01046	0.0117	0.00626	0.01864	0.01387	0.01699	0.01188	0.00815	0.01336	0.01293	0.02066	0.01304	0.00865	0.01362	0.01424	0.01232	0.01094	0.01159	0.00971	0.01336	0.01342	0.00672
50.5	0.01068	0.01637	0.01164	-0.00503	0.01218	0.01539	0.00845	0.01475	0.02554	0.01107	0.01027	0.00952	0.01601	-0.01414	0.0074	0.00995	0.00608	0.01474	0.0232	0.01179	0.01387	0.01425	0.02485	0.01108	0.01125	0.01081	0.01751	0.01149	0.01196	0.00668	0.01927	0.01423	0.01764	0.01206	0.0083	0.01387	0.01343	0.02136	0.01359	0.00905	0.0141	0.01462	0.0129	0.01128	0.01214	0.01022	0.01385	0.01405	0.00723
50.6	0.0111	0.01693	0.01181	-0.00276	0.01272	0.01595	0.00838	0.01505	0.02605	0.01172	0.0108	0.0102	0.0172	-0.01325	0.0074	0.01015	0.00628	0.01526	0.02355	0.01215	0.01433	0.0146	0.02522	0.01137	0.01164	0.01123	0.01795	0.01268	0.0122	0.00705	0.01988	0.01459	0.01813	0.01224	0.0084	0.01437	0.01391	0.02188	0.01397	0.00938	0.01452	0.01492	0.01344	0.01157	0.01257	0.01053	0.0143	0.0146	0.00776
50.7	0.01149	0.01743	0.01192	-0.000304	0.0132	0.01644	0.00833	0.0153	0.02645	0.01226	0.01129	0.0109	0.01786	-0.01096	0.00742	0.01027	0.00645	0.01583	0.02397	0.01252	0.01475	0.01504	0.0255	0.01165	0.01194	0.01157	0.01834	0.01383	0.01242	0.00737	0.0204	0.01493	0.01854	0.01242	0.00845	0.01474	0.0144	0.02229	0.01426	0.00969	0.01491	0.01511	0.01394	0.0118	0.01293	0.01074	0.01473	0.01501	0.00826
50.8	0.01184	0.01794	0.01198	0.00211	0.01361	0.01686	0.00827	0.01556	0.02676	0.0127	0.01176	0.01155	0.01722	-0.00794	0.00764	0.01034	0.00663	0.01634	0.02437	0.01282	0.01514	0.01557	0.02575	0.01186	0.01224	0.01189	0.01859	0.01493	0.01258	0.00764	0.02077	0.01524	0.01886	0.01258	0.00847	0.01506	0.01488	0.02266	0.01449	0.00994	0.01532	0.01529	0.01443	0.01205	0.01323	0.0109	0.01507	0.01538	0.00871
50.9	0.0122	0.01841	0.01201	0.00439	0.01398	0.01716	0.00823	0.01589	0.02699	0.01305	0.01219	0.01204	0.01712	-0.00488	0.00807	0.01034	0.00682	0.01667	0.02463	0.01306	0.01546	0.01613	0.02597	0.01202	0.01251	0.01221	0.01876	0.01593	0.01272	0.00787	0.02108	0.01546	0.01912	0.01276	0.00854	0.01532	0.01534	0.02297	0.01466	0.01018	0.01565	0.01536	0.01483	0.01233	0.01347	0.01107	0.01533	0.01571	0.0091
51	0.0125	0.0188	0.01204	0.00662	0.01428	0.01743	0.00817	0.01629	0.02718	0.01333	0.01247	0.0124	0.01711	-0.00189	0.00874	0.01026	0.00701	0.01695	0.02479	0.01324	0.01568	0.01667	0.02615	0.01218	0.01275	0.01249	0.01887	0.01673	0.01285	0.00802	0.02127	0.0156	0.01939	0.01289	0.00861	0.01554	0.0158	0.0232	0.01479	0.01036	0.01588	0.01543	0.01511	0.01264	0.01367	0.01118	0.01553	0.01603	0.00942
51.1	0.01278	0.01908	0.0121	0.00845	0.01458	0.01761	0.00819	0.01684	0.02729	0.01354	0.01262	0.01269	0.01716	0.00104	0.00954	0.01016	0.00711	0.01707	0.02483	0.01335	0.01586	0.01745	0.02639	0.01233	0.01294	0.01271	0.01894	0.0155	0.01297	0.00812	0.02135	0.01568	0.01967	0.01299	0.00868	0.01574	0.01634	0.02342	0.01483	0.01046	0.01602	0.01556	0.01535	0.01291	0.01389	0.01126	0.0157	0.01628	0.00966
51.2	0.013	0.01926	0.01218	0.00971	0.01483	0.01771	0.00834	0.01738	0.02734	0.01372	0.01268	0.01293	0.01718	0.00359	0.01029	0.01004	0.00712	0.01717	0.02481	0.01337	0.01595	0.01819	0.02654	0.01248	0.01311	0.01285	0.01894	0.01398	0.01308	0.00817	0.02135	0.0157	0.01983	0.01305	0.00872	0.01587	0.01679	0.02358	0.0148	0.01052	0.01609	0.01571	0.01547	0.01311	0.01407	0.01138	0.01586	0.01646	0.00985
51.3	0.01329	0.01937	0.0123	0.01051	0.01503	0.01774	0.00847	0.01798	0.02733	0.01391	0.01269	0.01315	0.01723	0.00492	0.01082	0.00989	0.00705	0.01738	0.0247	0.01328	0.01598	0.01858	0.02663	0.01259	0.01318	0.01294	0.01888	0.01346	0.01314	0.00819	0.02133	0.01567	0.0199	0.01311	0.00876	0.016	0.01711	0.02364	0.01468	0.01055	0.01616	0.01577	0.01549	0.0133	0.01425	0.01144	0.01596	0.0166	0.00995
51.4	0.01355	0.01943	0.01239	0.0111	0.01521	0.0177	0.00856	0.01865	0.02731	0.01407	0.01264	0.01325	0.01728	0.00537	0.01034	0.00975	0.00695	0.01765	0.02453	0.01315	0.01594	0.01871	0.02659	0.01269	0.01323	0.01299	0.01878	0.01312	0.01317	0.00817	0.02126	0.01562	0.0199	0.01315	0.00879	0.01608	0.01735	0.0236	0.0145	0.01052	0.01616	0.01575	0.01543	0.01342	0.01439	0.01139	0.01604	0.01666	0.00997
51.5	0.01376	0.01944	0.01243	0.01154	0.01539	0.01763	0.00863	0.01901	0.02724	0.01413	0.01254	0.0133	0.01737	0.00582	0.00936	0.00961	0.0068	0.01778	0.02434	0.013	0.01584	0.01871	0.02652	0.01277	0.01326	0.013	0.01866	0.01287	0.01315	0.00814	0.02112	0.01552	0.01984	0.01312	0.0088	0.01609	0.0175	0.02352	0.01431	0.01048	0.01609	0.01569	0.01531	0.01346	0.01454	0.01126	0.0161	0.01667	0.00994
51.6	0.01394	0.01943	0.01242	0.01186	0.0155	0.01753	0.00877	0.01653	0.02714	0.0141	0.01244	0.01329	0.01748	0.00616	0.00887	0.00947	0.00661	0.01784	0.02411	0.01284	0.01571	0.01863	0.02642	0.01278	0.0133	0.01294	0.0185	0.01269	0.01308	0.00817	0.02098	0.01538	0.01972	0.01311	0.00881	0.01604	0.01759	0.02336	0.01411	0.01041	0.01601	0.01558	0.01513	0.0134	0.0146	0.01106	0.0161	0.0166	0.00987
51.7	0.01406	0.01938	0.01234	0.01207	0.0155	0.01739	0.00892	0.01542	0.02703	0.01399	0.01235	0.01321	0.01771	0.00639	0.00854	0.0093	0.00641	0.01778	0.02381	0.01268	0.01557	0.0185	0.02624	0.01275	0.0133	0.01282	0.0183	0.01275	0.01299	0.00817	0.02082	0.01526	0.01958	0.01306	0.00876	0.01595	0.01763	0.02316	0.01394	0.0103	0.01591	0.01538	0.01493	0.01329	0.01461	0.01082	0.01607	0.01649	0.00979
51.8	0.0141	0.01927	0.01223	0.01217	0.01542	0.01722	0.00889	0.01459	0.02689	0.01384	0.01222	0.01309	0.01795	0.00653	0.00829	0.00916	0.00618	0.01766	0.02344	0.01254	0.01543	0.01833	0.02602	0.0127	0.01326	0.01268	0.0181	0.01306	0.01287	0.00811	0.02062	0.01517	0.01939	0.01303	0.00866	0.01582	0.0176	0.02292	0.0138	0.01018	0.01577	0.01515	0.01471	0.01314	0.01457	0.01056	0.01596	0.01636	0.00966
51.9	0.01417	0.01912	0.01207	0.01215	0.01531	0.01704	0.00876	0.01404	0.02667	0.01365	0.01206	0.01294	0.01819	0.00659	0.00806	0.00901	0.00595	0.0175	0.02302	0.01239	0.0153	0.01814	0.02576	0.01262	0.01317	0.01253	0.01787	0.01355	0.01273	0.00801	0.0204	0.01501	0.01919	0.01299	0.00856	0.01569	0.01752	0.02266	0.01361	0.01002	0.01563	0.01489	0.0145	0.01293	0.0145	0.01025	0.01583	0.01619	0.0095
52	0.01414	0.01894	0.01189	0.01207	0.01518	0.01686	0.00861	0.01363	0.02635	0.01343	0.01189	0.01277	0.0184	0.00657	0.00785	0.00885	0.00573	0.01733	0.02257	0.01222	0.01519	0.01794	0.02549	0.01251	0.01306	0.01236	0.01764	0.01421	0.01256	0.00788	0.02016	0.01484	0.019	0.0129	0.00847	0.01553	0.01742	0.02237	0.01337	0.00984	0.01546	0.01459	0.01429	0.01271	0.01439	0.00994	0.01563	0.01601	0.00931
52.1	0.01406	0.01876	0.0117	0.0119	0.01503	0.01669	0.00846	0.01331	0.02587	0.01322	0.01173	0.01259	0.01847	0.00654	0.00766	0.00869	0.0055	0.01715	0.02205	0.01206	0.01509	0.01773	0.02513	0.01236	0.01294	0.01219	0.01742	0.01487	0.01236	0.00771	0.01991	0.01466	0.0188	0.0128	0.00845	0.01534	0.01728	0.02208	0.01309	0.00961	0.01524	0.01436	0.01405	0.0125	0.0142	0.00961	0.01545	0.01584	0.00913
52.2	0.01395	0.01859	0.01151	0.01178	0.01489	0.01652	0.00825	0.01306	0.02514	0.01301	0.01157	0.01238	0.01801	0.00658	0.0075	0.0085	0.00528	0.01694	0.02147	0.01188	0.01501	0.01756	0.02478	0.01219	0.01278	0.01202	0.01719	0.01553	0.01216	0.00751	0.01963	0.01449	0.01859	0.01268	0.00855	0.01515	0.01711	0.02177	0.01277	0.00934	0.01499	0.01428	0.01385	0.01227	0.01398	0.00926	0.01528	0.01566	0.00895
52.3	0.0138	0.01841	0.01132	0.01162	0.01475	0.01634	0.00805	0.01293	0.02415	0.01278	0.01142	0.01213	0.0151	0.00669	0.00741	0.00831	0.00506	0.0167	0.02086	0.01169	0.01491	0.01741	0.02441	0.012	0.01262	0.01185	0.01697	0.01603	0.01193	0.0073	0.01934	0.01429	0.01837	0.01253	0.00878	0.01493	0.0169	0.02144	0.01244	0.00905	0.01473	0.01417	0.01364	0.01202	0.01376	0.00889	0.01505	0.0155	0.00878
52.4	0.01359	0.01823	0.01114	0.01144	0.0146	0.01616	0.00776	0.01293	0.02307	0.01256	0.01124	0.01187	0.01395	0.00681	0.00742	0.00811	0.00483	0.01643	0.02023	0.01149	0.01477	0.01715	0.02402	0.01181	0.01243	0.01168	0.01673	0.01397	0.01171	0.0071	0.01906	0.01408	0.01814	0.01234	0.0089	0.0147	0.01669	0.02108	0.01209	0.00875	0.01444	0.01394	0.0134	0.01176	0.01349	0.00852	0.01479	0.01533	0.00863
52.5	0.01335	0.01805	0.01095	0.01123	0.01445	0.01598	0.00741	0.01303	0.02196	0.01234	0.01105	0.01159	0.01326	0.00681	0.00752	0.00791	0.00461	0.01612	0.01959	0.01128	0.01462	0.01683	0.0236	0.01161	0.01221	0.0115	0.01646	0.01156	0.0115	0.00691	0.01879	0.01383	0.01789	0.01212	0.0089	0.01444	0.01645	0.02069	0.01174	0.00846	0.01415	0.01366	0.01313	0.01149	0.0132	0.00815	0.01452	0.01516	0.00847
52.6	0.0131	0.01788	0.01076	0.01093	0.0143	0.01577	0.00716	0.01326	0.02073	0.01211	0.01086	0.01132	0.01283	0.00515	0.00751	0.00769	0.00437	0.01574	0.01885	0.01105	0.0144	0.01646	0.02315	0.01139	0.01198	0.01133	0.01613	0.01044	0.01129	0.00673	0.01853	0.01356	0.01761	0.0119	0.00874	0.01415	0.01619	0.02029	0.01138	0.00817	0.01386	0.01338	0.01285	0.01122	0.01289	0.00777	0.01422	0.01497	0.00834
52.7	0.01283	0.01771	0.01057	0.01062	0.01416	0.01551	0.00746	0.01348	0.01947	0.01188	0.01069	0.01104	0.01254	0.00352	0.00622	0.00745	0.00414	0.01528	0.01805	0.0108	0.01415	0.01605	0.02269	0.01117	0.01173	0.01116	0.01572	0.00971	0.0111	0.00655	0.01825	0.01324	0.0173	0.01164	0.00851	0.01381	0.01589	0.01987	0.01102	0.0079	0.01358	0.0131	0.01257	0.01094	0.01258	0.0074	0.01392	0.01479	0.0082
52.8	0.01256	0.01753	0.01038	0.01031	0.01401	0.01517	0.00788	0.01358	0.01825	0.0117	0.01056	0.01076	0.01241	0.00291	0.00563	0.00722	0.00391	0.0148	0.01725	0.01056	0.01383	0.01548	0.02222	0.01093	0.01147	0.01101	0.01528	0.00924	0.01091	0.00639	0.0179	0.01281	0.01697	0.01137	0.00819	0.01338	0.01554	0.01939	0.01065	0.00764	0.0133	0.01284	0.01229	0.01066	0.01226	0.00702	0.01362	0.01461	0.00805
52.9	0.01229	0.01734	0.01017	0.01	0.01386	0.01481	0.008	0.01222	0.01717	0.01152	0.01046	0.01047	0.01243	0.00259	0.00518	0.00697	0.00367	0.01429	0.01644	0.01032	0.01345	0.01458	0.02173	0.01069	0.0112	0.01085	0.01479	0.00887	0.01072	0.00622	0.01754	0.0123	0.01661	0.01109	0.00788	0.01292	0.01517	0.01892	0.01028	0.00739	0.01302	0.01263	0.012	0.01038	0.01193	0.00665	0.01331	0.01443	0.00791
53	0.01201	0.01716	0.00998	0.00972	0.01368	0.01441	0.00788	0.01064	0.01618	0.01136	0.01042	0.01016	0.0125	0.00242	0.00485	0.00675	0.00345	0.01375	0.01566	0.01008	0.01305	0.01366	0.02128	0.01044	0.01092	0.01066	0.01429	0.00862	0.01051	0.00604	0.01721	0.01179	0.01619	0.01079	0.00757	0.01243	0.01478	0.0184	0.00992	0.00713	0.01273	0.01236	0.0117	0.01009	0.0116	0.00627	0.013	0.01425	0.00777
53.1	0.01174	0.01699	0.0098	0.0094	0.01351	0.01401	0.0077	0.00963	0.01527	0.01122	0.01043	0.00984	0.01254	0.00238	0.00456	0.00651	0.00321	0.01319	0.01491	0.00983	0.01259	0.01284	0.02083	0.01019	0.01065	0.01048	0.01372	0.00855	0.01028	0.00585	0.01682	0.01126	0.01573	0.01049	0.00722	0.01193	0.01439	0.01783	0.00956	0.00685	0.01243	0.01207	0.0114	0.0098	0.01126	0.00588	0.01269	0.01408	0.00759
53.2	0.01146	0.01682	0.0096	0.00917	0.0133	0.01355	0.00748	0.00892	0.01445	0.01105	0.01043	0.00953	0.01275	0.00254	0.00433	0.00627	0.00296	0.01265	0.01418	0.00958	0.01208	0.01222	0.0204	0.00993	0.01037	0.01027	0.01311	0.00877	0.01005	0.00565	0.01643	0.01076	0.01525	0.01019	0.00687	0.01138	0.01399	0.01723	0.00921	0.00657	0.01212	0.01176	0.0111	0.00949	0.01092	0.0055	0.01237	0.0139	0.00739
53.3	0.01118	0.01664	0.0094	0.00892	0.01304	0.01307	0.0072	0.00841	0.0137	0.01085	0.01041	0.00921	0.01307	0.00292	0.0042	0.00602	0.00272	0.01214	0.01347	0.00932	0.0115	0.01167	0.01997	0.00967	0.01009	0.01007	0.01249	0.00926	0.00982	0.00542	0.01603	0.01024	0.01477	0.00988	0.00654	0.01082	0.01358	0.01655	0.00883	0.00629	0.01181	0.0116	0.01081	0.00921	0.01058	0.00512	0.01205	0.01368	0.00716
53.4	0.01088	0.01645	0.00918	0.00876	0.01275	0.01257	0.00692	0.00795	0.01299	0.0106	0.01034	0.0089	0.01292	0.00333	0.00419	0.00576	0.00247	0.01164	0.01281	0.00908	0.01093	0.01116	0.01955	0.0094	0.00983	0.00986	0.01196	0.00983	0.00958	0.00521	0.01561	0.00967	0.01427	0.00958	0.00624	0.01029	0.01315	0.01586	0.00839	0.00601	0.01151	0.0113	0.01051	0.00893	0.01024	0.00474	0.01173	0.01348	0.00691
53.5	0.0106	0.01625	0.00897	0.00863	0.01242	0.0121	0.0066	0.00754	0.01238	0.01031	0.01019	0.00859	0.01153	0.00269	0.00432	0.00553	0.00222	0.01114	0.01219	0.00884	0.01043	0.01067	0.01915	0.00915	0.00955	0.00963	0.01149	0.01034	0.00933	0.00498	0.01523	0.00911	0.01381	0.00927	0.00597	0.00978	0.0127	0.01516	0.00799	0.00574	0.01119	0.01098	0.01021	0.00866	0.0099	0.00436	0.01141	0.01329	0.00665
53.6	0.01033	0.01602	0.00873	0.00865	0.01207	0.01163	0.00625	0.00714	0.01182	0.00999	0.00998	0.0083	0.01036	0.00163	0.00463	0.00527	0.00198	0.01061	0.01162	0.00861	0.00997	0.01022	0.0188	0.00889	0.0093	0.00941	0.01107	0.01098	0.00906	0.00477	0.01487	0.00857	0.01338	0.00897	0.00571	0.0093	0.01225	0.01449	0.00763	0.00545	0.01087	0.01063	0.00991	0.00842	0.00956	0.004	0.01109	0.01308	0.00639
53.7	0.01009	0.01579	0.00847	0.00886	0.01168	0.01118	0.00587	0.00677	0.01132	0.00966	0.00973	0.00803	0.00962	0.00118	0.0047	0.00503	0.00175	0.01008	0.01111	0.00837	0.00956	0.00981	0.01856	0.00864	0.00906	0.00921	0.01072	0.01121	0.00881	0.00456	0.01451	0.00804	0.01299	0.00868	0.00545	0.00884	0.01184	0.01385	0.00729	0.00519	0.01056	0.01028	0.00961	0.00822	0.00923	0.00362	0.01078	0.01287	0.00613
53.8	0.00985	0.01554	0.00821	0.009	0.0113	0.01073	0.00552	0.00658	0.01088	0.00929	0.00952	0.00773	0.00914	0.000866	0.00332	0.0048	0.00153	0.00962	0.01065	0.00812	0.00914	0.00944	0.01838	0.00843	0.00884	0.00902	0.0104	0.00924	0.00856	0.00434	0.01415	0.00756	0.01264	0.0084	0.0052	0.00839	0.01148	0.01327	0.00697	0.00496	0.01024	0.00993	0.0093	0.00803	0.00889	0.00326	0.01046	0.01264	0.00589
53.9	0.00965	0.01526	0.00793	0.00908	0.01092	0.01032	0.00518	0.00674	0.0105	0.00892	0.00936	0.00744	0.00876	0.000629	0.00267	0.00459	0.00132	0.00922	0.01022	0.00789	0.00878	0.00908	0.01822	0.00825	0.00864	0.00883	0.0101	0.00765	0.00831	0.00411	0.01384	0.00707	0.01227	0.00816	0.00495	0.00801	0.01119	0.01277	0.00664	0.00475	0.00993	0.00959	0.00899	0.00785	0.00857	0.00289	0.01014	0.01243	0.00568
54	0.00949	0.015	0.00765	0.00914	0.01062	0.00996	0.00481	0.00721	0.01018	0.00854	0.00915	0.00718	0.00847	0.000603	0.00229	0.00437	0.00111	0.00886	0.00985	0.00766	0.00847	0.00875	0.01808	0.00808	0.00845	0.00866	0.00982	0.00674	0.00805	0.00387	0.01354	0.00663	0.01195	0.00795	0.00471	0.00767	0.01094	0.01232	0.00632	0.00455	0.00961	0.00928	0.00867	0.0077	0.00827	0.00254	0.00981	0.01219	0.00545
54.1	0.00936	0.01473	0.00738	0.00914	0.01031	0.00962	0.00448	0.00575	0.00988	0.0082	0.0089	0.00696	0.00843	0.000929	0.002	0.00415	0.000897	0.00856	0.00952	0.00744	0.00821	0.00846	0.01794	0.00792	0.00827	0.00849	0.00957	0.0062	0.00779	0.00365	0.01326	0.00623	0.01166	0.00776	0.00448	0.00737	0.01074	0.01194	0.00603	0.00435	0.00929	0.00896	0.00838	0.00761	0.00796	0.0022	0.00948	0.01197	0.00521
54.2	0.00926	0.01448	0.00711	0.00904	0.01002	0.00929	0.00426	0.00489	0.00961	0.00786	0.00863	0.00677	0.00884	0.00141	0.00177	0.00393	0.000669	0.00829	0.00921	0.00723	0.00795	0.00817	0.01781	0.00776	0.0081	0.00832	0.00933	0.0058	0.00755	0.00342	0.013	0.00585	0.01138	0.00761	0.00424	0.00712	0.01058	0.0116	0.00573	0.0042	0.00899	0.00866	0.00809	0.00761	0.00771	0.00189	0.00919	0.01176	0.00499
54.3	0.00921	0.01422	0.00687	0.00892	0.00978	0.00899	0.00412	0.00437	0.00939	0.00754	0.00836	0.00659	0.00969	0.00196	0.00171	0.00369	0.000427	0.00806	0.00891	0.00704	0.00773	0.0079	0.01774	0.00761	0.00793	0.00815	0.0091	0.00549	0.00732	0.00322	0.01274	0.00547	0.01112	0.00746	0.00402	0.00692	0.01045	0.01129	0.00544	0.0041	0.00871	0.00836	0.00782	0.00767	0.00752	0.00159	0.00891	0.01155	0.00475
54.4	0.00922	0.014	0.00665	0.00881	0.00956	0.00874	0.00406	0.00397	0.00919	0.00724	0.00808	0.00647	0.01074	0.00233	0.00195	0.00346	0.000182	0.00786	0.00865	0.00686	0.00752	0.00765	0.01763	0.00745	0.00776	0.00798	0.00887	0.00543	0.0071	0.00302	0.01251	0.00513	0.01087	0.00737	0.0038	0.00674	0.01033	0.011	0.00513	0.00407	0.00844	0.00815	0.00757	0.00782	0.00739	0.00138	0.00864	0.01136	0.00449
54.5	0.00928	0.0138	0.00647	0.00872	0.00936	0.00854	0.00413	0.00367	0.00903	0.00696	0.00781	0.00642	0.01192	0.00132	0.00253	0.00325	-6.24e-05	0.00766	0.00841	0.00671	0.00734	0.00743	0.01746	0.00735	0.0076	0.00782	0.00865	0.00587	0.00688	0.00282	0.01229	0.00483	0.01064	0.00732	0.00358	0.00656	0.01021	0.0107	0.00486	0.00414	0.00817	0.00799	0.00739	0.00805	0.00732	0.00127	0.00842	0.01119	0.00425
54.6	0.00937	0.01364	0.00632	0.00864	0.00918	0.00834	0.00426	0.00343	0.00889	0.0067	0.00758	0.00642	0.01301	0.000398	0.00326	0.00305	-0.000256	0.00748	0.0082	0.00659	0.00716	0.00721	0.01745	0.00733	0.00748	0.00769	0.00846	0.00683	0.00668	0.00263	0.01207	0.00456	0.0104	0.00743	0.00336	0.00638	0.01008	0.01042	0.00458	0.00428	0.00792	0.00778	0.00728	0.00839	0.00734	0.00128	0.00825	0.01104	0.00403
54.7	0.00953	0.0135	0.00622	0.00865	0.00899	0.00817	0.00436	0.0035	0.00876	0.00644	0.00736	0.00646	0.01319	-0.000265	0.00423	0.00288	-0.000337	0.00737	0.00801	0.00657	0.00702	0.00703	0.01747	0.00741	0.00739	0.00759	0.00832	0.00783	0.0065	0.00246	0.01189	0.00431	0.01017	0.00766	0.00316	0.00618	0.00992	0.01013	0.0043	0.00453	0.00767	0.00756	0.00725	0.00869	0.00741	0.00136	0.00814	0.01092	0.00388
54.8	0.00978	0.01342	0.00618	0.00866	0.00882	0.008	0.00454	0.00399	0.00865	0.00622	0.00718	0.00662	0.01134	-0.000687	0.00525	0.00274	-0.000393	0.00734	0.00786	0.00679	0.00688	0.00687	0.01755	0.00759	0.00733	0.00752	0.00821	0.0091	0.00633	0.00231	0.01172	0.00408	0.00994	0.00792	0.00294	0.00596	0.00973	0.00985	0.00404	0.00482	0.00748	0.00733	0.00738	0.00899	0.00753	0.00149	0.00812	0.01086	0.00377
54.9	0.01012	0.0134	0.00631	0.00875	0.00863	0.00783	0.00462	0.00468	0.00852	0.00599	0.0071	0.00695	0.01044	-0.00104	0.00623	0.00262	-0.000457	0.00739	0.00772	0.00711	0.00676	0.00672	0.0178	0.00782	0.00728	0.00746	0.00812	0.01059	0.00618	0.00216	0.01159	0.0039	0.00972	0.00824	0.00273	0.00573	0.00953	0.00957	0.00381	0.00508	0.00733	0.00712	0.00762	0.00932	0.00775	0.00164	0.00814	0.01084	0.00376
55	0.01057	0.01353	0.00652	0.00884	0.00846	0.00766	0.00459	0.00567	0.00843	0.00578	0.00708	0.0074	0.0097	-0.00118	0.0063	0.00254	-0.000522	0.00752	0.00759	0.00738	0.00665	0.00658	0.0183	0.00805	0.00726	0.00743	0.00806	0.01081	0.00604	0.00206	0.0115	0.00376	0.00953	0.00867	0.00256	0.00549	0.00931	0.00931	0.0036	0.00533	0.00727	0.007	0.00794	0.0097	0.00809	0.00187	0.00821	0.01093	0.00381
55.1	0.01112	0.01388	0.00678	0.00896	0.00833	0.0075	0.0047	0.00682	0.00838	0.00561	0.00713	0.00783	0.00929	-0.000808	0.00585	0.00249	-0.000605	0.00771	0.00746	0.00766	0.00656	0.00646	0.01895	0.00825	0.00732	0.00743	0.00807	0.00896	0.006	0.002	0.01149	0.00366	0.00943	0.0091	0.00242	0.00526	0.00911	0.00911	0.00343	0.00556	0.00727	0.00727	0.00833	0.01022	0.00855	0.00215	0.00836	0.01109	0.00401
55.2	0.01176	0.01435	0.00703	0.00916	0.00822	0.00736	0.0049	0.007	0.00839	0.00551	0.00731	0.00826	0.00903	-0.000113	0.0058	0.00249	-0.000714	0.00792	0.00734	0.00797	0.00648	0.00638	0.01965	0.00843	0.00745	0.00743	0.00809	0.00843	0.00606	0.00197	0.01156	0.00356	0.00938	0.00954	0.00236	0.00504	0.0089	0.00895	0.00333	0.00583	0.00737	0.00772	0.00873	0.01089	0.00899	0.00246	0.00858	0.01133	0.00434
55.3	0.01252	0.01493	0.00745	0.00954	0.0081	0.00723	0.0051	0.00478	0.00844	0.0055	0.00764	0.00867	0.00907	0.000869	0.00586	0.0025	-0.000773	0.00814	0.00722	0.00833	0.00642	0.00635	0.0203	0.00873	0.00761	0.00747	0.00812	0.00816	0.00622	0.00203	0.01168	0.0035	0.0094	0.00997	0.0024	0.00486	0.00869	0.00884	0.00329	0.00615	0.00757	0.008	0.00917	0.01164	0.00945	0.00275	0.00887	0.01167	0.00476
55.4	0.01325	0.01551	0.00792	0.01001	0.008	0.00716	0.00529	0.00416	0.00852	0.00553	0.008	0.0092	0.0097	0.00172	0.00595	0.0025	-0.000762	0.00845	0.00714	0.00869	0.00645	0.00632	0.02088	0.0091	0.00785	0.00753	0.00819	0.00803	0.00642	0.00218	0.01188	0.00346	0.00953	0.01043	0.00252	0.00472	0.0085	0.00888	0.00328	0.0065	0.00783	0.00823	0.00975	0.0125	0.01002	0.00305	0.00924	0.01208	0.00527
55.5	0.01406	0.01616	0.0084	0.01056	0.00801	0.00715	0.00554	0.00378	0.00859	0.00563	0.00844	0.00976	0.01074	0.00246	0.00609	0.00258	-0.000747	0.00881	0.00711	0.00908	0.00653	0.00632	0.02137	0.00951	0.0081	0.00762	0.00826	0.00806	0.00663	0.00237	0.01221	0.00343	0.00976	0.01098	0.00269	0.00462	0.00836	0.00912	0.00332	0.00684	0.00822	0.00843	0.0105	0.01333	0.01067	0.0034	0.00967	0.01261	0.00587
55.6	0.01503	0.01693	0.00891	0.01123	0.00814	0.00721	0.00591	0.00354	0.00867	0.00589	0.00891	0.01028	0.01218	0.00233	0.0064	0.00274	-0.000733	0.00919	0.0071	0.00942	0.00662	0.00643	0.02185	0.00997	0.00832	0.0077	0.00845	0.00849	0.00698	0.00259	0.01267	0.00341	0.01012	0.01152	0.00286	0.00457	0.0083	0.00955	0.00346	0.00729	0.00891	0.00871	0.01122	0.01414	0.01139	0.00378	0.01019	0.01335	0.00657
55.7	0.01604	0.0178	0.0095	0.01196	0.00835	0.00739	0.0068	0.00345	0.00881	0.00639	0.00938	0.01081	0.01395	0.002	0.00695	0.00292	-0.000719	0.0096	0.00708	0.00977	0.00672	0.00665	0.02242	0.0105	0.00863	0.00786	0.00878	0.00955	0.00751	0.0029	0.01319	0.0034	0.01073	0.01219	0.00316	0.0046	0.0083	0.01003	0.00368	0.00782	0.0096	0.00905	0.01205	0.01502	0.01209	0.00428	0.01071	0.01429	0.00732
55.8	0.01697	0.01871	0.01028	0.01267	0.00864	0.00771	0.00793	0.0037	0.00903	0.00703	0.00998	0.01125	0.01556	0.0019	0.00773	0.0032	-0.00066	0.00994	0.00719	0.01013	0.00688	0.00691	0.02313	0.01104	0.00905	0.00803	0.00938	0.0112	0.00804	0.00322	0.01371	0.00339	0.01154	0.01302	0.00365	0.00473	0.0084	0.01055	0.00396	0.00845	0.01027	0.00943	0.01276	0.01595	0.01276	0.00475	0.01133	0.01542	0.00808
55.9	0.01786	0.01967	0.01104	0.01334	0.00899	0.00817	0.00868	0.00457	0.00935	0.00777	0.01071	0.01171	0.01644	0.00186	0.00889	0.00354	-0.000512	0.01038	0.00787	0.01047	0.0071	0.0072	0.02391	0.0117	0.00952	0.00827	0.01003	0.01298	0.00853	0.00361	0.01428	0.00342	0.01244	0.01388	0.00418	0.0049	0.00867	0.01118	0.00432	0.00922	0.01091	0.0099	0.01357	0.01685	0.01344	0.00524	0.01226	0.01655	0.00886
56	0.0188	0.02071	0.0118	0.01402	0.00938	0.00874	0.00907	0.00589	0.00969	0.00852	0.01149	0.01214	0.01536	0.00194	0.01027	0.00398	-0.000239	0.01092	0.00934	0.01089	0.00735	0.00757	0.02463	0.0124	0.01002	0.00856	0.0107	0.01473	0.00904	0.00415	0.01486	0.00354	0.01343	0.01472	0.00483	0.00516	0.00905	0.01183	0.00483	0.0099	0.01153	0.01044	0.0145	0.01781	0.01427	0.0057	0.01306	0.01764	0.00977
56.1	0.0198	0.02175	0.01259	0.01474	0.00998	0.00941	0.00929	0.00723	0.0101	0.0093	0.01229	0.01254	0.0144	0.00214	0.01144	0.00451	9.81e-05	0.01152	0.01065	0.01141	0.00766	0.00804	0.02536	0.01319	0.01058	0.00883	0.01144	0.01642	0.00945	0.00469	0.01559	0.00372	0.01449	0.01558	0.00554	0.0055	0.00955	0.01256	0.00532	0.01063	0.01215	0.01105	0.01543	0.01892	0.01515	0.00608	0.01376	0.01863	0.01076
56.2	0.02087	0.02284	0.01349	0.01536	0.01076	0.01022	0.00948	0.00873	0.01084	0.01015	0.01325	0.01294	0.01412	0.00272	0.01055	0.00509	0.00054	0.01199	0.01163	0.01205	0.00804	0.00867	0.02608	0.01401	0.01123	0.00917	0.01221	0.01811	0.00988	0.00517	0.01637	0.00399	0.01557	0.01643	0.00627	0.00593	0.01012	0.01337	0.00592	0.0113	0.01271	0.0117	0.0163	0.01998	0.01597	0.00652	0.01441	0.01967	0.01174
56.3	0.022	0.02409	0.01451	0.01613	0.01157	0.01107	0.00967	0.01006	0.01178	0.01112	0.01434	0.01346	0.01412	0.00361	0.01056	0.00575	0.0011	0.01254	0.01239	0.0128	0.00851	0.00942	0.02677	0.0149	0.01193	0.00954	0.01306	0.01761	0.01037	0.00566	0.0171	0.00423	0.0167	0.01724	0.00694	0.00644	0.01076	0.01418	0.00659	0.01195	0.01329	0.01231	0.01734	0.021	0.01678	0.00709	0.01509	0.02066	0.01262
56.4	0.023	0.02545	0.01543	0.01706	0.01236	0.01196	0.00981	0.00982	0.01261	0.01217	0.01546	0.01409	0.01426	0.0046	0.01078	0.00645	0.00172	0.01348	0.01302	0.01358	0.00908	0.01019	0.02739	0.01574	0.01264	0.00993	0.01404	0.01561	0.01096	0.00614	0.01781	0.00446	0.01784	0.01802	0.00766	0.00702	0.01152	0.01502	0.00729	0.01251	0.01386	0.01294	0.01833	0.02204	0.01769	0.00769	0.01571	0.02158	0.01351
56.5	0.02393	0.027	0.01633	0.01814	0.01326	0.01289	0.00986	0.00908	0.01339	0.01323	0.01652	0.01484	0.01466	0.00544	0.01107	0.00711	0.00235	0.01454	0.01361	0.01438	0.00974	0.011	0.02817	0.01655	0.01337	0.01041	0.01497	0.01531	0.01159	0.0066	0.01847	0.00473	0.01897	0.01881	0.00833	0.00768	0.01235	0.01587	0.00791	0.01301	0.01447	0.01366	0.01923	0.02302	0.01861	0.00819	0.01634	0.02254	0.01442
56.6	0.02489	0.02841	0.01726	0.01928	0.01429	0.01388	0.00994	0.00901	0.01403	0.01446	0.01752	0.01565	0.01583	0.0053	0.01142	0.0078	0.00292	0.01546	0.01406	0.01522	0.01046	0.01177	0.02901	0.01737	0.01412	0.011	0.01592	0.01543	0.01227	0.00704	0.01977	0.00508	0.02018	0.01964	0.00899	0.00837	0.01321	0.01672	0.00857	0.01351	0.01526	0.01462	0.02021	0.02406	0.01961	0.00868	0.01698	0.02364	0.01525
56.7	0.02596	0.02968	0.01821	0.02028	0.01539	0.01512	0.01004	0.00905	0.01453	0.01574	0.01864	0.01652	0.01781	0.00475	0.01218	0.00851	0.00357	0.01628	0.01441	0.01606	0.01125	0.01255	0.0299	0.01825	0.01491	0.01168	0.01691	0.01573	0.01299	0.00748	0.0214	0.0055	0.02149	0.02053	0.00968	0.00911	0.01417	0.01754	0.00931	0.01401	0.01609	0.01572	0.02131	0.02517	0.02072	0.0094	0.01762	0.02475	0.01607
56.8	0.02721	0.03113	0.0192	0.02114	0.01656	0.01642	0.01022	0.00918	0.01503	0.01698	0.01982	0.01746	0.0201	0.00466	0.01363	0.00922	0.00429	0.01725	0.01479	0.01691	0.01213	0.01338	0.03094	0.01916	0.01575	0.01237	0.01783	0.01631	0.01375	0.0079	0.0225	0.00598	0.02279	0.02149	0.01041	0.00982	0.01533	0.01837	0.01017	0.01455	0.01705	0.01687	0.02245	0.02637	0.02173	0.01036	0.01823	0.02588	0.01688
56.9	0.02856	0.03248	0.02093	0.02204	0.01779	0.01758	0.01044	0.00961	0.0155	0.01834	0.02106	0.01846	0.02273	0.00479	0.01559	0.0099	0.00499	0.01826	0.01513	0.01778	0.01297	0.01429	0.03193	0.02003	0.0166	0.0131	0.01881	0.01759	0.01451	0.00832	0.02337	0.00651	0.02411	0.02245	0.01115	0.01054	0.01659	0.01921	0.01113	0.01519	0.01809	0.01796	0.02378	0.02782	0.02276	0.01137	0.01889	0.027	0.01776
57	0.03	0.03401	0.02296	0.02297	0.01902	0.01883	0.0109	0.01064	0.01591	0.01972	0.02234	0.01948	0.02547	0.00503	0.01786	0.01079	0.00568	0.01931	0.01549	0.01867	0.01382	0.01522	0.03287	0.02103	0.01749	0.01384	0.01983	0.0198	0.01525	0.00874	0.02417	0.00721	0.02542	0.02346	0.01194	0.0113	0.01791	0.01998	0.01208	0.01588	0.01919	0.01901	0.02528	0.02925	0.0239	0.01235	0.01961	0.02818	0.01867
57.1	0.03163	0.03569	0.02451	0.02373	0.02003	0.02006	0.01161	0.01238	0.01623	0.02114	0.02374	0.02056	0.02783	0.00561	0.01989	0.01182	0.00644	0.02037	0.01589	0.01963	0.01477	0.01607	0.03368	0.02203	0.01838	0.01466	0.0209	0.02254	0.0161	0.00916	0.02491	0.0087	0.02683	0.02449	0.01267	0.01225	0.0193	0.02069	0.01299	0.01666	0.02041	0.02001	0.0269	0.03081	0.02523	0.01329	0.02035	0.02941	0.01968
57.2	0.03361	0.03739	0.02587	0.02443	0.02155	0.02115	0.01251	0.01436	0.01658	0.02253	0.02517	0.02163	0.02976	0.00707	0.02029	0.0128	0.0076	0.02132	0.01633	0.02079	0.01579	0.01695	0.03454	0.02311	0.01936	0.01555	0.02204	0.02517	0.01705	0.0096	0.0255	0.00988	0.02832	0.02548	0.01344	0.01332	0.02055	0.02132	0.01403	0.01748	0.02178	0.02093	0.02861	0.03252	0.02681	0.014	0.0211	0.03073	0.02075
57.3	0.03596	0.03948	0.02724	0.02511	0.02354	0.02228	0.01356	0.01609	0.01704	0.0239	0.02672	0.02271	0.02933	0.00899	0.02027	0.01366	0.00889	0.02235	0.01689	0.02201	0.01684	0.01789	0.03557	0.02411	0.02044	0.01648	0.0234	0.02763	0.01816	0.01014	0.02606	0.01102	0.02987	0.02656	0.01419	0.01442	0.02175	0.02191	0.01511	0.01834	0.023	0.02188	0.03031	0.03449	0.02858	0.01475	0.02189	0.03217	0.02188
57.4	0.03846	0.04231	0.02855	0.02583	0.02554	0.02344	0.0146	0.01722	0.01757	0.0254	0.02835	0.02383	0.02917	0.01066	0.02066	0.01458	0.0099	0.02348	0.0176	0.02324	0.01786	0.0189	0.03678	0.02503	0.02151	0.01732	0.02478	0.03009	0.01939	0.01074	0.02658	0.01212	0.03141	0.02781	0.01497	0.01558	0.02281	0.02269	0.01611	0.01935	0.0242	0.02302	0.03203	0.03666	0.03031	0.01557	0.02282	0.03382	0.02301
57.5	0.04113	0.04457	0.02991	0.0266	0.02754	0.02464	0.01552	0.01812	0.01824	0.02709	0.03008	0.02513	0.02977	0.01209	0.02108	0.01556	0.01069	0.02474	0.01838	0.02448	0.01885	0.01997	0.03814	0.02583	0.02269	0.01811	0.0262	0.03254	0.02061	0.01139	0.0272	0.01304	0.03283	0.02924	0.01561	0.01676	0.02404	0.02358	0.0171	0.02047	0.02541	0.02438	0.03385	0.03887	0.03216	0.01653	0.02391	0.03557	0.0242
57.6	0.0438	0.04678	0.0313	0.02756	0.02953	0.02596	0.01641	0.01702	0.01911	0.02881	0.03195	0.02638	0.03036	0.0125	0.02158	0.01657	0.0114	0.02614	0.01915	0.02573	0.01987	0.02113	0.03962	0.02673	0.02404	0.01897	0.02769	0.03148	0.02191	0.01207	0.02777	0.01389	0.03429	0.03084	0.01625	0.01789	0.02533	0.02477	0.01818	0.0218	0.02661	0.02584	0.0358	0.04115	0.03411	0.01761	0.02496	0.03763	0.02543
57.7	0.04636	0.04896	0.03273	0.02874	0.03139	0.02758	0.01737	0.01708	0.02003	0.03068	0.03384	0.0278	0.03107	0.01245	0.0224	0.01771	0.01196	0.02774	0.01998	0.02709	0.02104	0.02239	0.04121	0.02769	0.02541	0.01992	0.02935	0.03178	0.02335	0.01267	0.02837	0.01468	0.03609	0.03264	0.01712	0.01891	0.02666	0.02612	0.01929	0.02331	0.0279	0.02745	0.03782	0.04341	0.03619	0.01866	0.02613	0.03968	0.02685
57.8	0.04889	0.05177	0.03491	0.03017	0.03324	0.02949	0.01831	0.01732	0.02103	0.03252	0.03586	0.02933	0.03251	0.01265	0.02384	0.01905	0.01242	0.02944	0.02092	0.02847	0.02231	0.02378	0.04267	0.02867	0.02688	0.02099	0.03117	0.03253	0.02499	0.0132	0.02914	0.01549	0.03817	0.03441	0.01829	0.01994	0.02807	0.02757	0.02056	0.02481	0.02927	0.02939	0.04006	0.04569	0.03835	0.01978	0.02748	0.04173	0.02849
57.9	0.05139	0.05554	0.03731	0.03152	0.03529	0.0315	0.01925	0.0175	0.02223	0.03456	0.03835	0.03088	0.03489	0.01287	0.02588	0.02039	0.01284	0.03118	0.02205	0.02998	0.02374	0.0253	0.04407	0.02982	0.02854	0.02206	0.03309	0.03355	0.02651	0.01376	0.03006	0.01631	0.04046	0.03632	0.01959	0.02109	0.02961	0.02921	0.02188	0.02639	0.03078	0.03162	0.04242	0.04822	0.0406	0.02109	0.02877	0.04397	0.03023
58	0.05416	0.05884	0.03993	0.03298	0.0374	0.03351	0.01999	0.01806	0.02372	0.03717	0.04126	0.03252	0.03757	0.0133	0.02844	0.0218	0.01346	0.0329	0.02334	0.03166	0.02533	0.02689	0.04558	0.03092	0.03035	0.02314	0.03519	0.03503	0.02747	0.0144	0.03111	0.01708	0.04297	0.03828	0.02108	0.02224	0.03112	0.03124	0.02324	0.02872	0.03245	0.03391	0.04491	0.05102	0.043	0.02261	0.03017	0.04636	0.0321
58.1	0.05711	0.06178	0.04248	0.03443	0.03973	0.03567	0.0206	0.0194	0.02542	0.04025	0.04405	0.03424	0.0402	0.01434	0.03099	0.0232	0.01423	0.03434	0.02465	0.03346	0.02702	0.02856	0.04726	0.03216	0.03232	0.02437	0.03738	0.03765	0.02849	0.01518	0.03225	0.01782	0.04564	0.04028	0.02286	0.02354	0.03274	0.03329	0.02478	0.03114	0.03429	0.03643	0.04752	0.05408	0.04555	0.02439	0.03151	0.04888	0.03403
58.2	0.06038	0.06466	0.04504	0.03628	0.04238	0.03819	0.02126	0.02152	0.027	0.04345	0.04692	0.03614	0.04302	0.01593	0.03356	0.02481	0.01503	0.03566	0.02604	0.03528	0.02881	0.0303	0.04931	0.03367	0.03435	0.02567	0.03951	0.04129	0.02947	0.01603	0.03348	0.01862	0.04845	0.04245	0.02471	0.02486	0.03443	0.03523	0.02646	0.03339	0.03643	0.03902	0.05041	0.05742	0.0484	0.02614	0.03307	0.05156	0.03607
58.3	0.06429	0.06787	0.04782	0.03823	0.04525	0.04082	0.02231	0.02391	0.02837	0.04701	0.04992	0.03827	0.046	0.01798	0.0356	0.0265	0.0158	0.0373	0.02751	0.0373	0.0303	0.03208	0.05155	0.03536	0.0363	0.02704	0.04187	0.04576	0.03059	0.01689	0.03484	0.01953	0.05131	0.04493	0.02656	0.02633	0.03621	0.03726	0.02818	0.03569	0.03876	0.04172	0.05357	0.0609	0.05145	0.02775	0.03474	0.05443	0.03837
58.4	0.06842	0.07177	0.05101	0.04026	0.04827	0.04373	0.02382	0.02639	0.0297	0.05084	0.05312	0.04071	0.04704	0.01928	0.03646	0.02824	0.01716	0.03954	0.02903	0.0395	0.0318	0.03393	0.05403	0.03741	0.03829	0.02855	0.04442	0.05069	0.03191	0.01783	0.03631	0.02058	0.05441	0.04742	0.02849	0.0279	0.03812	0.03934	0.03014	0.0382	0.04123	0.04446	0.05707	0.06474	0.05473	0.02937	0.03671	0.05753	0.04078
58.5	0.07286	0.07609	0.05418	0.04221	0.05142	0.04708	0.02549	0.02684	0.03115	0.05461	0.05649	0.04352	0.04808	0.01932	0.0375	0.03015	0.0186	0.04221	0.0307	0.04174	0.03347	0.03603	0.05666	0.03985	0.04046	0.03023	0.04705	0.05583	0.03372	0.01889	0.03801	0.02188	0.05794	0.05002	0.03039	0.02964	0.04019	0.04137	0.03232	0.04068	0.04377	0.04737	0.06072	0.06883	0.05844	0.03117	0.03874	0.06105	0.04329
58.6	0.07757	0.08077	0.05758	0.04422	0.05481	0.05062	0.02732	0.02682	0.03261	0.05822	0.06007	0.04642	0.04946	0.02	0.03877	0.03228	0.01989	0.04515	0.03238	0.04413	0.0353	0.03814	0.05948	0.04245	0.04272	0.03198	0.04985	0.06085	0.03612	0.02018	0.03995	0.02324	0.06184	0.05289	0.03224	0.03145	0.04233	0.0434	0.0345	0.04345	0.04653	0.05028	0.06447	0.07347	0.06223	0.03321	0.04098	0.06487	0.04593
58.7	0.08248	0.08578	0.06127	0.04634	0.05858	0.0541	0.029	0.02732	0.03411	0.06207	0.06364	0.04956	0.05113	0.02077	0.0401	0.03444	0.02126	0.04773	0.03406	0.04675	0.03747	0.04039	0.06251	0.04517	0.04517	0.03371	0.05274	0.0656	0.03898	0.02156	0.04189	0.02462	0.06587	0.05591	0.03408	0.03332	0.04463	0.0456	0.03683	0.04639	0.04955	0.05337	0.06858	0.07839	0.06631	0.03552	0.04322	0.0688	0.04888
58.8	0.08772	0.09123	0.06517	0.04872	0.06258	0.05768	0.03078	0.02806	0.03568	0.06611	0.06754	0.0529	0.05396	0.02174	0.04192	0.03672	0.02273	0.05041	0.03561	0.04983	0.03988	0.04264	0.06557	0.04784	0.04795	0.03551	0.05577	0.06834	0.04203	0.023	0.04384	0.02604	0.07017	0.05914	0.0359	0.03531	0.04714	0.04812	0.03916	0.04939	0.05263	0.05657	0.0731	0.08354	0.07097	0.03777	0.04554	0.07296	0.05228
58.9	0.09347	0.0972	0.06953	0.0512	0.06676	0.06164	0.03247	0.02892	0.03739	0.07053	0.07192	0.05633	0.05794	0.02315	0.04483	0.0392	0.02421	0.05353	0.03725	0.05316	0.04257	0.04508	0.06882	0.05044	0.0509	0.03735	0.05893	0.06985	0.0452	0.02442	0.04618	0.02766	0.07463	0.06254	0.038	0.0374	0.04973	0.05067	0.04162	0.05247	0.05574	0.05985	0.07819	0.08905	0.07558	0.04012	0.04806	0.07726	0.05609
59	0.09972	0.10351	0.07419	0.05388	0.07128	0.06586	0.03418	0.0303	0.03919	0.07563	0.07664	0.05968	0.06245	0.02515	0.04884	0.04191	0.02578	0.05689	0.03915	0.05664	0.04541	0.0478	0.07231	0.05323	0.05405	0.03921	0.06229	0.07245	0.04839	0.02582	0.04874	0.02942	0.07953	0.06626	0.04032	0.03958	0.0524	0.05361	0.04428	0.05563	0.05908	0.06391	0.08363	0.09498	0.08054	0.04264	0.05077	0.08185	0.06018
59.1	0.10629	0.11027	0.07905	0.05686	0.0763	0.07004	0.03611	0.03281	0.04118	0.081	0.08205	0.06317	0.0668	0.02781	0.05335	0.04463	0.02752	0.06045	0.04116	0.06021	0.04829	0.05081	0.07618	0.05629	0.05731	0.04086	0.06588	0.07526	0.05179	0.02728	0.05109	0.03125	0.08467	0.0702	0.04266	0.04189	0.05541	0.05722	0.04733	0.0593	0.06263	0.06826	0.08942	0.10123	0.08579	0.04541	0.05362	0.08668	0.06444
59.2	0.11267	0.11724	0.08428	0.06027	0.08148	0.07461	0.03813	0.0361	0.04332	0.08676	0.08808	0.06691	0.07153	0.03111	0.05797	0.0476	0.02941	0.06436	0.04341	0.06381	0.05138	0.05403	0.08007	0.05946	0.06084	0.04253	0.06975	0.0796	0.05522	0.02883	0.05326	0.03296	0.0903	0.07432	0.04504	0.04444	0.0587	0.06073	0.05084	0.06334	0.06646	0.07286	0.09525	0.10803	0.09141	0.04852	0.05659	0.09162	0.0688
59.3	0.11966	0.12449	0.08982	0.06387	0.08706	0.07957	0.04023	0.04017	0.0455	0.09287	0.09413	0.07089	0.07693	0.03455	0.06111	0.05058	0.03143	0.06843	0.04571	0.06775	0.05488	0.05727	0.08405	0.06269	0.06475	0.04444	0.07401	0.08603	0.05876	0.03046	0.0555	0.03468	0.09665	0.07878	0.04747	0.04711	0.06224	0.06399	0.05443	0.06772	0.07054	0.07766	0.10125	0.11522	0.09783	0.05182	0.05979	0.09697	0.07323
59.4	0.12756	0.13207	0.09601	0.06745	0.09288	0.08476	0.04228	0.04406	0.04789	0.09925	0.10052	0.07532	0.08214	0.036	0.06351	0.05367	0.03366	0.07276	0.04799	0.07193	0.05845	0.06071	0.08798	0.06606	0.0689	0.04649	0.07876	0.09384	0.06222	0.03221	0.05769	0.03653	0.10291	0.08352	0.05002	0.05001	0.06621	0.0674	0.05807	0.07222	0.07484	0.08255	0.1078	0.12312	0.10507	0.05501	0.06333	0.10265	0.07795
59.5	0.13594	0.14008	0.10235	0.07112	0.09881	0.09029	0.0446	0.04775	0.05048	0.10595	0.1071	0.07993	0.08536	0.03725	0.06625	0.05702	0.036	0.07706	0.05015	0.07631	0.06235	0.06454	0.09223	0.0696	0.07345	0.04873	0.08389	0.10229	0.06572	0.0341	0.05976	0.03856	0.10945	0.08847	0.05276	0.05304	0.07024	0.07088	0.06189	0.07697	0.07933	0.08791	0.11466	0.13153	0.11247	0.05886	0.06687	0.10866	0.08289
59.6	0.14519	0.14842	0.10892	0.07508	0.10528	0.09604	0.04715	0.05095	0.05305	0.11313	0.11426	0.08484	0.08821	0.0385	0.07018	0.0605	0.0385	0.08136	0.05236	0.08104	0.06654	0.06864	0.09667	0.07353	0.07803	0.05095	0.08941	0.11093	0.06937	0.03601	0.06187	0.04072	0.11639	0.09357	0.05586	0.05625	0.07453	0.07476	0.06572	0.08254	0.08408	0.09385	0.12212	0.14005	0.12003	0.06324	0.07067	0.11533	0.08843
59.7	0.15471	0.15712	0.11604	0.07903	0.11222	0.10229	0.04983	0.05232	0.05563	0.12076	0.12179	0.09029	0.09157	0.03996	0.07579	0.06415	0.0412	0.086	0.0546	0.08578	0.07068	0.07296	0.10145	0.07799	0.08278	0.05326	0.09536	0.11974	0.07335	0.0379	0.0641	0.04306	0.12386	0.099	0.05933	0.05973	0.07921	0.07907	0.07005	0.0886	0.08897	0.10023	0.13005	0.14891	0.12816	0.06834	0.07474	0.12256	0.09428
59.8	0.16448	0.16613	0.12347	0.08317	0.11951	0.10882	0.05249	0.05261	0.05844	0.12905	0.13005	0.09607	0.09675	0.04246	0.08235	0.06805	0.04399	0.09091	0.0568	0.09072	0.07503	0.07749	0.1069	0.08254	0.08789	0.0557	0.10177	0.12882	0.07784	0.03996	0.06639	0.04563	0.13167	0.10494	0.06319	0.06359	0.08418	0.08337	0.07475	0.09463	0.09427	0.10671	0.1383	0.15835	0.13704	0.0737	0.07915	0.13023	0.1005
59.9	0.17501	0.17651	0.13087	0.08739	0.12712	0.11568	0.05506	0.05384	0.0614	0.13792	0.13919	0.10229	0.10379	0.04607	0.0895	0.07274	0.0469	0.09622	0.05913	0.09601	0.07944	0.08239	0.11267	0.08724	0.09325	0.05834	0.10871	0.13809	0.0827	0.0421	0.06894	0.04839	0.14007	0.11103	0.06707	0.06782	0.08976	0.08816	0.07963	0.10068	0.09962	0.11366	0.14717	0.16826	0.14665	0.07945	0.08395	0.13857	0.10711
60	0.18619	0.18766	0.13845	0.09196	0.13517	0.12288	0.05831	0.05508	0.06448	0.14736	0.14923	0.10864	0.11196	0.04964	0.09711	0.07784	0.05004	0.10218	0.06171	0.10175	0.08413	0.08772	0.11866	0.0923	0.09915	0.06116	0.11603	0.14806	0.08772	0.04431	0.07163	0.05114	0.14892	0.11775	0.07097	0.07234	0.0958	0.09324	0.08483	0.10697	0.10526	0.12093	0.15661	0.17877	0.15723	0.08584	0.08895	0.14751	0.11418
60.1	0.19757	0.19917	0.14617	0.09735	0.14352	0.13029	0.06165	0.05685	0.06781	0.15721	0.15954	0.11539	0.12098	0.05387	0.10543	0.08277	0.05338	0.10839	0.06428	0.10819	0.08918	0.09352	0.12497	0.09789	0.10539	0.06419	0.12379	0.15434	0.09318	0.04666	0.07451	0.05415	0.15777	0.12491	0.07515	0.07719	0.10254	0.09873	0.09071	0.11381	0.11131	0.12858	0.16726	0.1902	0.16872	0.09246	0.09421	0.15713	0.12157
60.2	0.20954	0.21135	0.15464	0.10283	0.15199	0.1381	0.06512	0.05983	0.0714	0.16756	0.17064	0.12256	0.13058	0.05828	0.11447	0.08755	0.05699	0.11494	0.06715	0.11501	0.0943	0.09973	0.13212	0.10375	0.11187	0.0673	0.13212	0.16042	0.0991	0.04901	0.07768	0.05727	0.16773	0.13238	0.07951	0.08248	0.10996	0.10462	0.09694	0.12082	0.11784	0.13663	0.17909	0.20251	0.1809	0.09938	0.1001	0.16657	0.12924
60.3	0.22184	0.22425	0.16347	0.10858	0.161	0.14606	0.06873	0.06412	0.07505	0.17805	0.18286	0.13022	0.14098	0.06052	0.12303	0.09253	0.0609	0.12203	0.07022	0.12192	0.09969	0.10634	0.13987	0.10975	0.1187	0.07052	0.14126	0.16764	0.10531	0.05137	0.08095	0.06051	0.17832	0.14003	0.08438	0.08813	0.1179	0.11074	0.10395	0.1284	0.12468	0.14544	0.19244	0.21533	0.19369	0.10757	0.10629	0.17668	0.13746
60.4	0.23435	0.23752	0.17241	0.11459	0.17036	0.15486	0.0724	0.06882	0.07867	0.18913	0.19613	0.13851	0.15172	0.06245	0.1296	0.09777	0.06511	0.12946	0.07341	0.12931	0.10561	0.1135	0.14827	0.1165	0.12576	0.0737	0.15124	0.17817	0.11196	0.05372	0.08423	0.06394	0.18953	0.14812	0.09	0.09433	0.12623	0.11737	0.11115	0.13614	0.1317	0.15507	0.20632	0.22908	0.20735	0.11603	0.11322	0.18739	0.14612
60.5	0.2476	0.25139	0.1819	0.12084	0.18067	0.16357	0.0759	0.07415	0.08252	0.20068	0.21109	0.14728	0.16239	0.06449	0.13645	0.10346	0.06974	0.13631	0.07683	0.13733	0.11178	0.1212	0.15686	0.12395	0.13342	0.07693	0.16197	0.19123	0.11892	0.05614	0.08746	0.06751	0.20136	0.15656	0.09607	0.10112	0.13512	0.12436	0.11831	0.14458	0.13895	0.16549	0.22111	0.24331	0.22184	0.12519	0.12076	0.19871	0.15545
60.6	0.26145	0.26599	0.19245	0.12775	0.19122	0.17291	0.07917	0.07844	0.08668	0.21265	0.22657	0.15664	0.17123	0.06706	0.14609	0.10937	0.07486	0.14391	0.08022	0.14585	0.11825	0.12966	0.16565	0.13153	0.14169	0.08021	0.17369	0.20601	0.12633	0.05881	0.09113	0.07104	0.21347	0.16542	0.10245	0.10842	0.14483	0.13197	0.12588	0.15348	0.14654	0.17638	0.23673	0.25822	0.23698	0.13529	0.12894	0.21077	0.1656
60.7	0.2759	0.28155	0.2035	0.13515	0.20244	0.18269	0.08268	0.08062	0.09121	0.22533	0.24209	0.16654	0.17843	0.07116	0.15816	0.11607	0.0805	0.15239	0.08342	0.15517	0.1251	0.13851	0.17469	0.13961	0.15045	0.0836	0.18625	0.2221	0.13429	0.06162	0.09513	0.07448	0.22639	0.17469	0.10902	0.11613	0.15531	0.13996	0.13422	0.16265	0.15466	0.1879	0.25334	0.27346	0.25263	0.14599	0.13737	0.22332	0.17641
60.8	0.29042	0.29734	0.21481	0.14286	0.21409	0.19281	0.08664	0.08331	0.09622	0.23855	0.25826	0.17725	0.18752	0.07679	0.17186	0.12324	0.08655	0.16189	0.08691	0.16502	0.13245	0.14767	0.18436	0.14786	0.15972	0.08712	0.19958	0.23884	0.14269	0.06466	0.09928	0.07799	0.23957	0.18423	0.11583	0.1239	0.16619	0.14826	0.14318	0.17172	0.16302	0.19963	0.27047	0.28927	0.26849	0.15735	0.14639	0.23659	0.18812
60.9	0.30499	0.31382	0.22628	0.1513	0.22621	0.20378	0.09074	0.08615	0.10139	0.25211	0.27468	0.18837	0.20088	0.08237	0.18654	0.13107	0.09303	0.17259	0.09058	0.1754	0.1402	0.15747	0.19496	0.15638	0.16951	0.09088	0.21405	0.2557	0.15154	0.06791	0.10349	0.08185	0.25316	0.19405	0.12275	0.13212	0.17732	0.15692	0.15251	0.18127	0.17154	0.21226	0.28812	0.30559	0.28448	0.16915	0.1556	0.25065	0.19994
61	0.31917	0.33102	0.23822	0.16035	0.2387	0.21565	0.09537	0.09069	0.10686	0.2659	0.29102	0.20009	0.21528	0.08884	0.20126	0.13948	0.10007	0.18427	0.09433	0.18615	0.14824	0.16774	0.20658	0.16523	0.18011	0.09472	0.22873	0.27253	0.16085	0.07121	0.10804	0.086	0.2672	0.20411	0.13016	0.14052	0.18917	0.16593	0.16207	0.19134	0.18062	0.22515	0.30593	0.32172	0.30062	0.18082	0.16531	0.2653	0.21214
61.1	0.33519	0.34866	0.2503	0.1699	0.25166	0.22761	0.10036	0.09717	0.11264	0.27965	0.30741	0.21255	0.22989	0.0956	0.21607	0.14837	0.10724	0.19668	0.09831	0.19707	0.15682	0.17823	0.21918	0.17454	0.19097	0.09863	0.24273	0.28898	0.17068	0.07477	0.11254	0.09036	0.28151	0.21463	0.13808	0.14904	0.20102	0.17531	0.1724	0.20199	0.18966	0.23781	0.32389	0.33749	0.31593	0.19226	0.17472	0.28052	0.22425
61.2	0.35285	0.36665	0.26248	0.18039	0.26453	0.24014	0.10558	0.10383	0.11907	0.29379	0.32363	0.22517	0.2443	0.10205	0.23034	0.15765	0.11485	0.20951	0.10231	0.20855	0.16599	0.18864	0.23201	0.184	0.20214	0.10245	0.25611	0.30352	0.18135	0.07826	0.11711	0.09491	0.29606	0.22506	0.14626	0.15742	0.21257	0.18544	0.18277	0.21255	0.19943	0.25066	0.34156	0.35292	0.3307	0.20317	0.18409	0.29662	0.23629
61.3	0.36864	0.38482	0.27485	0.1912	0.27754	0.25399	0.11166	0.11103	0.12568	0.30773	0.3384	0.23781	0.25794	0.10606	0.24251	0.16751	0.12242	0.2229	0.10628	0.22049	0.17567	0.19867	0.24539	0.19309	0.2137	0.10611	0.26861	0.31308	0.19238	0.0818	0.12189	0.09974	0.31076	0.23513	0.15459	0.16536	0.22371	0.19578	0.19371	0.22316	0.20957	0.26316	0.35828	0.36736	0.34446	0.21338	0.19325	0.31289	0.2477
61.4	0.38351	0.40319	0.28713	0.20185	0.29066	0.26878	0.11812	0.11852	0.13264	0.32155	0.35197	0.25088	0.26989	0.1095	0.25063	0.17771	0.13029	0.23648	0.11033	0.23293	0.18587	0.20843	0.25895	0.20195	0.22571	0.10962	0.2799	0.32156	0.20419	0.08568	0.12698	0.10484	0.32558	0.24502	0.16346	0.17279	0.23409	0.20618	0.20446	0.23353	0.21994	0.27527	0.37366	0.38104	0.35644	0.22243	0.20191	0.32911	0.25821
61.5	0.39756	0.42109	0.29949	0.21292	0.30366	0.28268	0.12414	0.12618	0.13952	0.33461	0.36344	0.26396	0.28002	0.11307	0.25763	0.1881	0.13844	0.25023	0.11469	0.24583	0.19608	0.21752	0.27248	0.2103	0.23788	0.11302	0.28977	0.33055	0.21626	0.08957	0.13231	0.11012	0.33985	0.25469	0.17228	0.17924	0.2434	0.21713	0.21509	0.24415	0.23052	0.28729	0.38709	0.3936	0.36688	0.23057	0.20987	0.34505	0.26765
61.6	0.41099	0.43865	0.31147	0.2241	0.31607	0.29615	0.12976	0.13142	0.14656	0.34715	0.37312	0.27717	0.28797	0.11713	0.26489	0.19908	0.14645	0.26383	0.11946	0.25903	0.20654	0.22578	0.28575	0.21795	0.25034	0.11617	0.29727	0.34119	0.22831	0.0934	0.13772	0.11531	0.35357	0.26384	0.18127	0.18466	0.25161	0.22851	0.22619	0.25415	0.24137	0.29835	0.39842	0.40434	0.37588	0.23728	0.21695	0.36051	0.27583
61.7	0.4235	0.45589	0.32352	0.23502	0.32823	0.30932	0.13518	0.13524	0.15392	0.35893	0.38107	0.28995	0.29138	0.12319	0.27172	0.20955	0.15421	0.27745	0.12438	0.27249	0.2171	0.23288	0.29903	0.22505	0.26297	0.11908	0.30279	0.35336	0.24055	0.09727	0.14294	0.12049	0.36655	0.27259	0.19046	0.18891	0.25802	0.23994	0.23768	0.26412	0.25262	0.30898	0.40764	0.41342	0.38346	0.24199	0.22314	0.37496	0.28265
61.8	0.43495	0.47194	0.33518	0.24556	0.33986	0.32267	0.14116	0.13914	0.16111	0.36976	0.38749	0.30217	0.29337	0.13074	0.27723	0.21991	0.16163	0.2908	0.12959	0.28579	0.22793	0.239	0.31162	0.23133	0.27547	0.12159	0.30664	0.365	0.25214	0.10106	0.14796	0.12599	0.37896	0.28078	0.19988	0.19201	0.26305	0.2515	0.24871	0.27354	0.26389	0.31857	0.41448	0.42029	0.3897	0.24518	0.22838	0.38859	0.28803
61.9	0.44542	0.48658	0.34667	0.25609	0.35105	0.33529	0.14786	0.14419	0.16808	0.37959	0.39206	0.31332	0.29491	0.13874	0.28181	0.22973	0.16901	0.30367	0.1357	0.29921	0.23874	0.24402	0.32354	0.23675	0.28791	0.12378	0.30908	0.3754	0.26343	0.10487	0.15277	0.13165	0.39023	0.28835	0.20917	0.19428	0.26691	0.26296	0.25976	0.28238	0.2755	0.32713	0.41922	0.42568	0.39458	0.24708	0.23268	0.40108	0.29219
62	0.45436	0.49999	0.35779	0.2658	0.36159	0.34703	0.15487	0.1508	0.17501	0.38818	0.3952	0.3237	0.29582	0.14664	0.28545	0.23907	0.17584	0.31562	0.14246	0.31218	0.24948	0.24812	0.33426	0.24168	0.29991	0.12566	0.31051	0.38477	0.27386	0.10906	0.15748	0.1374	0.40039	0.29535	0.21803	0.19579	0.26953	0.27364	0.27057	0.29085	0.2873	0.33478	0.42221	0.4297	0.39861	0.24822	0.23622	0.41218	0.29535
62.1	0.46187	0.51129	0.36826	0.27452	0.37081	0.35843	0.16192	0.15839	0.18206	0.39578	0.39721	0.33317	0.29638	0.15383	0.28829	0.24757	0.18214	0.32672	0.14917	0.32406	0.25987	0.25151	0.34378	0.24625	0.31168	0.12719	0.31134	0.39272	0.28329	0.11358	0.16197	0.14301	0.4091	0.30168	0.22625	0.19678	0.2712	0.28375	0.28087	0.29869	0.29846	0.34137	0.42397	0.43235	0.40196	0.24888	0.23918	0.42162	0.29764
62.2	0.46784	0.52082	0.37812	0.28191	0.37912	0.36899	0.17024	0.166	0.18865	0.40199	0.39834	0.34149	0.29672	0.15881	0.29022	0.25544	0.18768	0.33699	0.15598	0.3349	0.26954	0.25426	0.35181	0.2505	0.32333	0.12854	0.31167	0.39912	0.29183	0.11813	0.1662	0.1484	0.41653	0.30759	0.23436	0.19742	0.27232	0.29264	0.29072	0.30598	0.3095	0.34693	0.42488	0.43383	0.40424	0.24916	0.24175	0.42935	0.29919
62.3	0.47253	0.52837	0.38738	0.28815	0.38634	0.37876	0.17872	0.17295	0.19493	0.40701	0.39897	0.34851	0.29707	0.1622	0.29042	0.26253	0.19239	0.34568	0.16277	0.3448	0.27842	0.2565	0.35802	0.25449	0.33443	0.12967	0.31128	0.40439	0.29936	0.12262	0.17016	0.15347	0.42233	0.31314	0.24194	0.19781	0.273	0.30101	0.30023	0.31263	0.3201	0.3515	0.42516	0.43459	0.40588	0.24919	0.24405	0.43531	0.3002
62.4	0.4758	0.53383	0.39571	0.29335	0.39215	0.38746	0.18628	0.17934	0.20062	0.41093	0.39928	0.35435	0.29769	0.16573	0.2887	0.26867	0.19652	0.35276	0.16991	0.35333	0.28662	0.2584	0.36291	0.25848	0.3449	0.13066	0.3099	0.40844	0.30575	0.12716	0.17382	0.15844	0.42664	0.31828	0.24899	0.19802	0.27336	0.30889	0.3087	0.31834	0.3309	0.35535	0.4243	0.43489	0.40704	0.24907	0.24623	0.43964	0.30084
62.5	0.4777	0.53735	0.40337	0.29794	0.39665	0.39491	0.19412	0.18464	0.2054	0.41368	0.39935	0.35918	0.29835	0.17025	0.28816	0.27426	0.19989	0.35827	0.17739	0.36053	0.29405	0.26014	0.36643	0.26253	0.35419	0.13161	0.30777	0.40634	0.31093	0.13189	0.17725	0.16326	0.42954	0.32311	0.25539	0.19812	0.27354	0.31584	0.31616	0.32301	0.3413	0.35865	0.42157	0.43465	0.40769	0.2489	0.24863	0.44248	0.30125
62.6	0.47874	0.53933	0.41023	0.30156	0.39988	0.40096	0.20208	0.18702	0.20959	0.41525	0.3991	0.36266	0.2992	0.17568	0.28788	0.27906	0.20257	0.36251	0.18536	0.36615	0.30031	0.26169	0.36868	0.26679	0.36267	0.13261	0.30536	0.40592	0.31523	0.13687	0.18024	0.16797	0.43121	0.32737	0.2611	0.19817	0.27363	0.32203	0.32291	0.3269	0.35161	0.36118	0.41692	0.4333	0.40801	0.2487	0.25122	0.44415	0.30146
62.7	0.4792	0.54037	0.4159	0.30442	0.40215	0.40563	0.21054	0.18671	0.21337	0.41605	0.3983	0.36523	0.29991	0.18148	0.28774	0.28312	0.20479	0.3655	0.19371	0.37022	0.30558	0.26329	0.37005	0.27133	0.37029	0.13376	0.30303	0.40612	0.31853	0.14202	0.1828	0.1724	0.43213	0.33108	0.26625	0.19831	0.27365	0.32755	0.32873	0.32972	0.36135	0.36296	0.41075	0.43043	0.40812	0.24856	0.25431	0.44504	0.30158
62.8	0.47885	0.54032	0.42016	0.30647	0.40358	0.40929	0.21969	0.18756	0.21652	0.41643	0.39688	0.36694	0.29738	0.18703	0.28772	0.28657	0.20665	0.36736	0.202	0.37301	0.30972	0.26498	0.37077	0.27617	0.37703	0.13511	0.30088	0.40631	0.32098	0.14715	0.1851	0.17649	0.4325	0.33446	0.27091	0.19886	0.2737	0.33224	0.33351	0.33204	0.37078	0.36434	0.40372	0.42583	0.40799	0.2487	0.25788	0.44544	0.30162
62.9	0.47631	0.53726	0.42316	0.30811	0.40431	0.41189	0.22931	0.18827	0.21908	0.4163	0.39478	0.36802	0.2966	0.19257	0.28804	0.28927	0.20836	0.36844	0.21065	0.37481	0.31335	0.26688	0.37097	0.28118	0.38276	0.13685	0.29898	0.4064	0.32273	0.15237	0.18735	0.18047	0.43168	0.33756	0.275	0.20002	0.27387	0.33597	0.33754	0.3341	0.37963	0.36525	0.39671	0.41952	0.40755	0.2495	0.262	0.44509	0.30155
63	0.47007	0.52954	0.42519	0.30913	0.40464	0.41355	0.23909	0.18882	0.22116	0.41522	0.39225	0.36857	0.29612	0.19748	0.28909	0.29141	0.21005	0.36911	0.2191	0.37593	0.31588	0.26888	0.3708	0.28655	0.38744	0.13906	0.29748	0.40655	0.32396	0.15776	0.18984	0.18423	0.42855	0.34029	0.27838	0.20185	0.27418	0.33865	0.34101	0.33513	0.38755	0.36578	0.3897	0.41199	0.40653	0.25107	0.26645	0.44323	0.30134
63.1	0.461	0.51826	0.42624	0.30972	0.40467	0.41446	0.24958	0.1894	0.22269	0.41238	0.38868	0.36881	0.29577	0.2	0.29062	0.29307	0.21176	0.36953	0.22731	0.37665	0.31755	0.27115	0.37022	0.29184	0.39115	0.14174	0.2963	0.40679	0.3248	0.16315	0.19237	0.18781	0.42234	0.34269	0.28109	0.20423	0.27462	0.34047	0.34388	0.3356	0.39457	0.36605	0.38233	0.40358	0.4047	0.25325	0.27109	0.43939	0.30082
63.2	0.44992	0.50471	0.42671	0.31002	0.40417	0.41492	0.26002	0.19066	0.22385	0.40742	0.38395	0.36881	0.29572	0.20258	0.29187	0.29431	0.2137	0.36947	0.23556	0.37706	0.31864	0.27364	0.36914	0.29713	0.39401	0.14506	0.29537	0.40692	0.32532	0.16868	0.19478	0.19146	0.41421	0.34452	0.28349	0.20734	0.27525	0.34161	0.34575	0.3358	0.40059	0.36611	0.3746	0.39447	0.40189	0.25563	0.27561	0.43379	0.29991
63.3	0.43759	0.4894	0.42642	0.31007	0.40261	0.41503	0.27036	0.19218	0.22475	0.40071	0.37942	0.36855	0.29602	0.20545	0.29089	0.29518	0.21598	0.36837	0.24325	0.37667	0.31927	0.27615	0.36724	0.30227	0.396	0.14876	0.29463	0.40661	0.32562	0.17437	0.1972	0.19524	0.40466	0.3459	0.28553	0.21098	0.27599	0.34223	0.34703	0.33576	0.40542	0.36601	0.36686	0.38514	0.39799	0.25849	0.28039	0.4269	0.29855
63.4	0.42462	0.4733	0.42381	0.30991	0.39911	0.41478	0.28003	0.19384	0.22549	0.39273	0.37467	0.36777	0.29711	0.20935	0.2908	0.29577	0.21846	0.36573	0.25052	0.37464	0.31962	0.27849	0.36467	0.30702	0.39736	0.15273	0.29401	0.4051	0.32577	0.18031	0.19984	0.19915	0.39438	0.34689	0.28712	0.21488	0.27701	0.34253	0.34793	0.33522	0.40928	0.36554	0.35932	0.37568	0.39299	0.26193	0.28511	0.41918	0.29669
63.5	0.41101	0.45702	0.41819	0.30958	0.39333	0.41367	0.28952	0.19528	0.22615	0.38383	0.36991	0.36628	0.29852	0.21358	0.29086	0.29616	0.22106	0.36199	0.25742	0.37055	0.31973	0.2806	0.36163	0.31142	0.39821	0.15731	0.2935	0.40245	0.32583	0.18626	0.20303	0.20318	0.38326	0.34758	0.28842	0.21895	0.27845	0.34262	0.34843	0.33357	0.41203	0.36389	0.35156	0.3656	0.38715	0.2657	0.28947	0.41075	0.29421
63.6	0.39734	0.44056	0.40978	0.30912	0.38597	0.41047	0.29872	0.19647	0.22659	0.37462	0.36548	0.36407	0.2996	0.21849	0.29096	0.29644	0.22397	0.35754	0.26345	0.36479	0.31927	0.28261	0.3582	0.31531	0.39874	0.16222	0.29295	0.39804	0.32578	0.19219	0.20652	0.20738	0.37193	0.34796	0.28953	0.2231	0.28084	0.34253	0.34863	0.33047	0.41372	0.36079	0.34336	0.3557	0.38063	0.26939	0.29343	0.4023	0.29109
63.7	0.38388	0.42424	0.39955	0.30857	0.37772	0.40512	0.3076	0.19301	0.22685	0.36516	0.36018	0.36107	0.30084	0.22426	0.29134	0.29657	0.227	0.3523	0.26897	0.35798	0.31767	0.28433	0.35411	0.31872	0.39906	0.16701	0.29236	0.38075	0.3255	0.19815	0.21039	0.21156	0.36084	0.34808	0.29051	0.22714	0.28284	0.34207	0.34864	0.3261	0.41473	0.35612	0.33552	0.34586	0.37338	0.27269	0.29694	0.39408	0.2876
63.8	0.3709	0.4083	0.38823	0.30791	0.3689	0.39864	0.3158	0.19192	0.22704	0.35569	0.35406	0.35725	0.30129	0.23059	0.29213	0.29661	0.23014	0.34641	0.27327	0.35029	0.3144	0.28571	0.35003	0.32183	0.39912	0.17186	0.29171	0.37318	0.32499	0.20398	0.21469	0.21565	0.34968	0.34804	0.29128	0.23113	0.28427	0.34095	0.3484	0.32043	0.41526	0.35072	0.32746	0.33614	0.36593	0.27579	0.30007	0.38586	0.28373
63.9	0.35823	0.39332	0.37638	0.30719	0.35976	0.39153	0.32267	0.19143	0.22715	0.34628	0.34742	0.35259	0.29835	0.23629	0.29324	0.29659	0.2334	0.34057	0.27651	0.34227	0.31038	0.28683	0.34583	0.32461	0.39879	0.17678	0.29093	0.36537	0.3242	0.2101	0.21934	0.21958	0.33873	0.34786	0.2918	0.23489	0.28529	0.33917	0.34773	0.31409	0.41537	0.34485	0.31958	0.32693	0.35846	0.27851	0.30289	0.3777	0.27934
64	0.34606	0.37924	0.36453	0.3064	0.35014	0.38392	0.32839	0.19133	0.22717	0.33657	0.34078	0.34794	0.29703	0.23864	0.29444	0.29649	0.23682	0.33471	0.27887	0.33436	0.3059	0.28768	0.34121	0.32696	0.39764	0.18176	0.28994	0.3584	0.32294	0.21609	0.22415	0.2233	0.32792	0.34743	0.29215	0.23836	0.28596	0.33671	0.34648	0.3076	0.41418	0.33909	0.31179	0.31826	0.35075	0.28072	0.30545	0.36963	0.27447
64.1	0.33423	0.36516	0.35255	0.3056	0.34105	0.37643	0.33331	0.19189	0.22718	0.3273	0.33356	0.34331	0.29579	0.24084	0.29531	0.29628	0.24016	0.32855	0.28059	0.32676	0.30085	0.28827	0.33675	0.32892	0.39556	0.18684	0.28865	0.35213	0.32111	0.22174	0.22885	0.22689	0.31765	0.34652	0.29238	0.24136	0.28643	0.33383	0.34439	0.30041	0.41033	0.3332	0.30397	0.30967	0.34284	0.2824	0.30757	0.36185	0.26921
64.2	0.32283	0.35136	0.34077	0.30479	0.33159	0.36865	0.33739	0.1936	0.22714	0.31823	0.32626	0.33862	0.29442	0.243	0.29523	0.29593	0.24337	0.32243	0.28175	0.31919	0.29556	0.28859	0.33245	0.33052	0.39256	0.19207	0.28725	0.34593	0.31893	0.22717	0.23376	0.23031	0.30772	0.34488	0.2925	0.24393	0.28677	0.33088	0.34124	0.29294	0.40395	0.32715	0.29589	0.30123	0.33475	0.28362	0.30928	0.35428	0.26398
64.3	0.31191	0.33829	0.32919	0.30394	0.32212	0.3605	0.34029	0.19671	0.22709	0.30986	0.31914	0.3337	0.2928	0.24555	0.29183	0.29539	0.24655	0.31646	0.28239	0.3116	0.2905	0.28876	0.32779	0.33173	0.38871	0.19714	0.28553	0.33958	0.31622	0.23225	0.23863	0.23336	0.29817	0.34221	0.29254	0.24623	0.28698	0.32779	0.33708	0.28535	0.3957	0.32082	0.28834	0.29262	0.32684	0.28442	0.31057	0.34684	0.25893
64.4	0.30175	0.32631	0.31884	0.30306	0.31303	0.35183	0.3421	0.20061	0.22703	0.30151	0.31214	0.32859	0.29083	0.24874	0.2899	0.29455	0.24961	0.31058	0.28273	0.30428	0.2853	0.28881	0.32321	0.33254	0.38404	0.202	0.28339	0.33345	0.31314	0.23722	0.24353	0.23623	0.28868	0.33857	0.29254	0.24821	0.28705	0.3244	0.3323	0.27813	0.38628	0.31425	0.28096	0.28438	0.31866	0.28488	0.31155	0.33932	0.25402
64.5	0.29215	0.3151	0.30929	0.30213	0.30451	0.34335	0.34311	0.20439	0.22693	0.29335	0.30511	0.32385	0.28884	0.2522	0.28775	0.29341	0.25213	0.30489	0.28284	0.29687	0.28026	0.2888	0.31883	0.3331	0.37859	0.20663	0.28111	0.32721	0.30984	0.24196	0.24816	0.23879	0.27996	0.33423	0.29252	0.24984	0.28692	0.32078	0.32687	0.27101	0.37625	0.30759	0.27367	0.27675	0.31074	0.28507	0.31218	0.33189	0.24925
64.6	0.2835	0.30419	0.30031	0.30105	0.29646	0.33518	0.34357	0.20555	0.2268	0.28591	0.29812	0.3194	0.28686	0.25554	0.28545	0.29188	0.25435	0.29914	0.28284	0.28998	0.27532	0.28865	0.31426	0.33349	0.37284	0.21102	0.27864	0.32084	0.30635	0.24639	0.2525	0.241	0.27191	0.32953	0.29245	0.25109	0.28647	0.31676	0.32118	0.26387	0.36559	0.30071	0.26699	0.26926	0.30309	0.28503	0.31244	0.32467	0.24456
64.7	0.27518	0.29397	0.29169	0.29963	0.28842	0.32735	0.3435	0.2053	0.22665	0.2783	0.29154	0.31482	0.28163	0.25755	0.28311	0.29002	0.25662	0.29334	0.28272	0.28319	0.27058	0.28822	0.30973	0.33375	0.36682	0.21516	0.27575	0.3141	0.30259	0.25041	0.2566	0.24302	0.26419	0.32464	0.29213	0.25214	0.28559	0.31241	0.31505	0.25684	0.35562	0.29417	0.26051	0.26161	0.2956	0.28485	0.3125	0.31772	0.23982
64.8	0.26711	0.28421	0.28372	0.29779	0.28092	0.31972	0.34309	0.20621	0.2265	0.27109	0.28506	0.31014	0.27381	0.25738	0.28073	0.28784	0.25923	0.28776	0.28237	0.2763	0.26573	0.28725	0.30514	0.33393	0.36064	0.2191	0.27256	0.29846	0.29897	0.25435	0.26045	0.24473	0.25737	0.31973	0.29135	0.25302	0.28416	0.30796	0.30916	0.25026	0.34579	0.28793	0.25395	0.25459	0.28825	0.28456	0.31239	0.31074	0.23532
64.9	0.25906	0.27498	0.27686	0.29543	0.27357	0.31239	0.34242	0.2071	0.22633	0.2643	0.27866	0.30535	0.26967	0.25775	0.27828	0.28537	0.26363	0.2822	0.28176	0.26984	0.26125	0.28563	0.30051	0.33401	0.35431	0.22287	0.26919	0.28076	0.29535	0.25822	0.26399	0.24615	0.25099	0.31442	0.28992	0.2537	0.28234	0.30352	0.30332	0.24413	0.33624	0.28183	0.24771	0.24781	0.28118	0.28418	0.3122	0.30392	0.23092
65	0.25128	0.26656	0.27056	0.2925	0.26666	0.30502	0.34161	0.20834	0.22608	0.25826	0.27228	0.30033	0.2661	0.25826	0.27574	0.28234	0.26715	0.27668	0.28084	0.26375	0.25698	0.28339	0.2957	0.3339	0.34784	0.22656	0.26554	0.27247	0.29186	0.26162	0.26732	0.24743	0.24439	0.30896	0.28774	0.2542	0.2801	0.29924	0.29739	0.23842	0.32702	0.27578	0.24187	0.24123	0.27438	0.28354	0.3119	0.29709	0.22665
65.1	0.24421	0.25871	0.26486	0.28917	0.26037	0.29783	0.34065	0.21073	0.22567	0.25284	0.26627	0.2953	0.26288	0.25875	0.27306	0.27903	0.26914	0.27135	0.27957	0.25764	0.25288	0.28047	0.29076	0.33339	0.3415	0.22989	0.26184	0.26535	0.28832	0.26459	0.27058	0.24852	0.23782	0.30349	0.28488	0.25451	0.27734	0.29491	0.29147	0.23286	0.31808	0.26957	0.23677	0.23487	0.26764	0.28251	0.31136	0.29049	0.22258
65.2	0.23777	0.25113	0.2595	0.28579	0.25476	0.29099	0.33933	0.21408	0.22494	0.24753	0.26034	0.29049	0.25983	0.25981	0.26029	0.27549	0.27073	0.26598	0.27782	0.25188	0.249	0.27709	0.28597	0.33229	0.33559	0.23277	0.25819	0.26	0.28477	0.26737	0.27344	0.24937	0.23171	0.29808	0.28148	0.25468	0.27411	0.29061	0.28598	0.2276	0.31005	0.2642	0.2319	0.22896	0.26116	0.2811	0.31047	0.28414	0.21872
65.3	0.23181	0.24458	0.25422	0.28242	0.24912	0.28461	0.33749	0.21751	0.22386	0.24253	0.25488	0.28552	0.25692	0.26136	0.25523	0.27168	0.27207	0.26083	0.27584	0.24648	0.24537	0.27354	0.28121	0.33025	0.32965	0.23542	0.2547	0.25546	0.28117	0.2698	0.27594	0.24998	0.22581	0.29296	0.27766	0.25477	0.27087	0.28631	0.28034	0.2226	0.30265	0.25932	0.22686	0.22375	0.25539	0.27922	0.30906	0.27803	0.21511
65.4	0.22612	0.23846	0.24898	0.27912	0.24345	0.27829	0.335	0.22119	0.2223	0.23761	0.25026	0.28063	0.2543	0.263	0.25062	0.2681	0.27308	0.2561	0.27375	0.24141	0.24192	0.26993	0.2768	0.32746	0.32346	0.23789	0.25116	0.25159	0.27747	0.27196	0.278	0.25045	0.22023	0.28805	0.27386	0.25479	0.26755	0.28191	0.27456	0.21789	0.29561	0.25515	0.22174	0.21926	0.24976	0.27656	0.30697	0.27232	0.21165
65.5	0.22103	0.23253	0.24419	0.27595	0.23808	0.27234	0.33199	0.22478	0.22024	0.23297	0.24544	0.27598	0.25186	0.26359	0.2469	0.26428	0.27376	0.25163	0.27144	0.23659	0.23858	0.26636	0.27271	0.32417	0.3175	0.24006	0.24756	0.24815	0.27349	0.27378	0.2796	0.25078	0.21508	0.2831	0.27013	0.25472	0.26402	0.27718	0.26887	0.21342	0.28896	0.25112	0.21688	0.21482	0.2443	0.2732	0.30425	0.26695	0.20855
65.6	0.21652	0.22654	0.23974	0.27257	0.2332	0.26635	0.32837	0.22651	0.21777	0.22855	0.24046	0.27156	0.24965	0.26219	0.24403	0.26059	0.27424	0.24744	0.26905	0.23194	0.2354	0.2627	0.26867	0.32042	0.31145	0.24201	0.24418	0.24495	0.26927	0.27531	0.28082	0.25096	0.21034	0.27822	0.26661	0.25452	0.26044	0.27283	0.26346	0.20933	0.28346	0.24725	0.2127	0.21061	0.23906	0.26968	0.30109	0.26175	0.20579
65.7	0.21236	0.22051	0.2358	0.26921	0.2288	0.2605	0.32415	0.22417	0.21495	0.22449	0.23568	0.26715	0.24519	0.26139	0.2412	0.25709	0.27458	0.24354	0.26676	0.22759	0.23231	0.25895	0.26476	0.31641	0.3057	0.24376	0.2408	0.24203	0.26557	0.27668	0.28169	0.25102	0.20602	0.27346	0.26321	0.25405	0.25672	0.26909	0.25832	0.20555	0.27795	0.24377	0.20899	0.20674	0.23406	0.26618	0.29819	0.25675	0.20326
65.8	0.2084	0.215	0.23233	0.26607	0.22473	0.25484	0.31961	0.22444	0.21195	0.22058	0.23101	0.26274	0.23459	0.261	0.23849	0.25346	0.27479	0.23987	0.26445	0.22348	0.22948	0.25531	0.26056	0.31256	0.30016	0.24533	0.23769	0.23936	0.26224	0.27786	0.2823	0.25102	0.20225	0.26873	0.25957	0.25323	0.25324	0.26558	0.25371	0.20198	0.27277	0.24042	0.20586	0.20313	0.22942	0.26253	0.29496	0.25212	0.20096
65.9	0.20477	0.20984	0.22979	0.26294	0.22092	0.24942	0.31486	0.22486	0.20885	0.21698	0.22666	0.25883	0.23047	0.26069	0.23591	0.24962	0.27491	0.23648	0.26215	0.2196	0.2266	0.25202	0.25606	0.30907	0.29484	0.24665	0.23462	0.23118	0.25919	0.27885	0.28269	0.25099	0.19864	0.26425	0.25581	0.25195	0.24999	0.26192	0.24933	0.19873	0.26769	0.23719	0.20298	0.19981	0.22509	0.25881	0.29148	0.24767	0.19882
66	0.20133	0.20483	0.22737	0.25978	0.21728	0.24429	0.30995	0.2253	0.2058	0.21363	0.22262	0.25505	0.22716	0.26046	0.23291	0.24578	0.27493	0.23322	0.25995	0.21595	0.22396	0.24913	0.25158	0.30562	0.28979	0.24773	0.23153	0.21885	0.25631	0.27962	0.28287	0.25093	0.19515	0.25983	0.25204	0.25036	0.24678	0.25832	0.24504	0.1957	0.26254	0.23429	0.20041	0.19675	0.22108	0.25522	0.28793	0.24338	0.1968
66.1	0.19819	0.2002	0.22493	0.25657	0.21398	0.24012	0.30504	0.22597	0.20282	0.21048	0.2187	0.25138	0.2246	0.26049	0.22313	0.24194	0.27479	0.23012	0.25766	0.21249	0.22152	0.24615	0.2471	0.30205	0.28484	0.24867	0.22852	0.21303	0.25347	0.2802	0.28292	0.25083	0.19194	0.25543	0.24845	0.24856	0.24365	0.25518	0.24106	0.19298	0.25777	0.23156	0.19799	0.19379	0.21738	0.25185	0.2844	0.2391	0.19497
66.2	0.19532	0.19595	0.22248	0.25357	0.21066	0.2359	0.30025	0.22736	0.20015	0.20764	0.21496	0.24792	0.22244	0.26105	0.21824	0.23839	0.27451	0.22728	0.25546	0.20926	0.21911	0.24307	0.24316	0.29844	0.27999	0.24938	0.22559	0.20905	0.25068	0.28053	0.28289	0.25066	0.18887	0.2512	0.24511	0.24655	0.24064	0.25224	0.23753	0.19035	0.25306	0.22897	0.19586	0.19103	0.21379	0.24877	0.28094	0.23515	0.1933
66.3	0.19269	0.19215	0.2201	0.25086	0.20734	0.23153	0.29561	0.22903	0.19762	0.205	0.21135	0.24473	0.22046	0.26192	0.21461	0.23489	0.27416	0.22467	0.25327	0.20633	0.2168	0.23997	0.23954	0.29478	0.27515	0.24989	0.22271	0.20599	0.24804	0.28074	0.2828	0.25037	0.18571	0.24703	0.24187	0.24453	0.23782	0.24958	0.23406	0.18798	0.24889	0.22642	0.19383	0.18839	0.21037	0.24574	0.27761	0.23146	0.19179
66.4	0.19021	0.18868	0.21777	0.24823	0.20406	0.22749	0.29093	0.2311	0.19536	0.20259	0.20801	0.24179	0.21855	0.26052	0.21189	0.23159	0.27372	0.22233	0.25113	0.20361	0.2147	0.2368	0.23627	0.29121	0.27045	0.25028	0.22003	0.20353	0.24547	0.28084	0.2826	0.24993	0.18271	0.24291	0.23872	0.2426	0.23511	0.24685	0.23069	0.18585	0.2452	0.22401	0.19177	0.18581	0.2073	0.24283	0.27445	0.22795	0.19062
66.5	0.18791	0.18547	0.2155	0.2457	0.20119	0.22391	0.28597	0.23328	0.1932	0.20033	0.20504	0.23918	0.21692	0.25883	0.20974	0.22819	0.27319	0.22009	0.24907	0.20122	0.21267	0.23381	0.2334	0.28782	0.26609	0.2506	0.2176	0.20137	0.24315	0.28087	0.2821	0.24937	0.18003	0.2391	0.23587	0.24082	0.23254	0.24394	0.22753	0.1839	0.2415	0.22176	0.18974	0.18334	0.20453	0.24014	0.27135	0.22445	0.1896
66.6	0.18579	0.18253	0.21352	0.24328	0.19867	0.22026	0.28127	0.23424	0.19127	0.19831	0.20217	0.2365	0.21548	0.25814	0.20785	0.22488	0.27246	0.21784	0.24719	0.19924	0.21096	0.23106	0.23068	0.28473	0.26191	0.25086	0.21542	0.19958	0.24102	0.28088	0.28114	0.24863	0.17751	0.23565	0.23266	0.23902	0.2301	0.24126	0.22473	0.18247	0.23799	0.21978	0.18789	0.18107	0.20209	0.23749	0.26843	0.2212	0.18864
66.7	0.1838	0.17992	0.21174	0.24097	0.19629	0.21685	0.27693	0.22989	0.18951	0.19641	0.19988	0.23377	0.21413	0.25763	0.20617	0.22211	0.27154	0.21578	0.24553	0.1974	0.2095	0.22843	0.22822	0.28173	0.25799	0.25106	0.21326	0.19814	0.23904	0.2809	0.27974	0.2477	0.1753	0.23244	0.22908	0.23714	0.22795	0.23879	0.22217	0.18119	0.23469	0.21799	0.18614	0.17903	0.19986	0.23507	0.26566	0.21823	0.18783
66.8	0.18195	0.17748	0.21017	0.23883	0.19406	0.21366	0.27281	0.22911	0.18801	0.19458	0.19826	0.23096	0.20752	0.25716	0.20476	0.21954	0.27054	0.21429	0.24405	0.19564	0.20827	0.22603	0.22576	0.27871	0.25411	0.2512	0.21131	0.19709	0.23718	0.28093	0.27796	0.24665	0.1733	0.22929	0.22621	0.23521	0.22592	0.23648	0.21981	0.17974	0.23165	0.21638	0.18443	0.17732	0.19775	0.2329	0.26303	0.2153	0.18696
66.9	0.1803	0.17522	0.20866	0.23679	0.19224	0.21081	0.26908	0.22865	0.1867	0.19291	0.19664	0.22832	0.20485	0.25685	0.2029	0.21728	0.26942	0.21311	0.24276	0.19397	0.20732	0.22374	0.22352	0.27582	0.25026	0.25131	0.2095	0.19626	0.23522	0.28097	0.27579	0.24545	0.17136	0.22632	0.22382	0.23343	0.22409	0.23424	0.21763	0.17831	0.22889	0.21485	0.18287	0.17587	0.19594	0.23092	0.26063	0.2125	0.18619
67	0.17882	0.17293	0.20725	0.235	0.19071	0.20809	0.26575	0.22833	0.18542	0.19145	0.19498	0.22594	0.20282	0.25693	0.19801	0.21525	0.26816	0.21208	0.24155	0.19247	0.20658	0.22156	0.22135	0.27332	0.2466	0.25141	0.20791	0.19533	0.23368	0.28101	0.27338	0.2441	0.16953	0.22352	0.22179	0.23173	0.2224	0.23231	0.21565	0.17698	0.22638	0.21329	0.18154	0.17462	0.19436	0.22891	0.25843	0.21012	0.18557
67.1	0.17749	0.17096	0.20593	0.23321	0.18931	0.20554	0.26264	0.22827	0.18421	0.19009	0.19334	0.22376	0.20136	0.25712	0.1946	0.21356	0.26674	0.21129	0.24031	0.19106	0.20598	0.21975	0.21935	0.27105	0.24292	0.2515	0.20643	0.19078	0.23237	0.281	0.27078	0.24267	0.16786	0.22094	0.22006	0.2302	0.22083	0.23058	0.21372	0.17582	0.22398	0.21189	0.18017	0.17352	0.19286	0.22703	0.25627	0.20806	0.18504
67.2	0.17631	0.16913	0.20473	0.23154	0.18814	0.20312	0.25993	0.22906	0.18302	0.18881	0.19179	0.22185	0.20028	0.25548	0.1928	0.21206	0.26535	0.21071	0.23905	0.18971	0.20549	0.21808	0.21759	0.26872	0.23966	0.25156	0.20501	0.18347	0.23116	0.2809	0.26809	0.24141	0.16613	0.21839	0.21856	0.22881	0.21935	0.22911	0.2119	0.17473	0.22168	0.21079	0.17899	0.17243	0.19138	0.22541	0.25422	0.20619	0.18457
67.3	0.17526	0.16738	0.20365	0.23008	0.18705	0.20081	0.25735	0.23084	0.18188	0.18758	0.19032	0.22017	0.19951	0.25378	0.19144	0.21068	0.26397	0.21026	0.23781	0.18857	0.20509	0.21662	0.21607	0.26669	0.23684	0.25159	0.20373	0.18116	0.23016	0.28067	0.26533	0.24018	0.1647	0.21598	0.21731	0.22753	0.21801	0.22788	0.21023	0.17384	0.21952	0.20985	0.17805	0.17117	0.18998	0.22411	0.25233	0.20433	0.18418
67.4	0.17434	0.16571	0.20259	0.22874	0.18591	0.19868	0.25489	0.2329	0.18073	0.18655	0.18901	0.21864	0.19932	0.25308	0.19028	0.20949	0.26259	0.20986	0.23659	0.18766	0.20475	0.21534	0.21475	0.2647	0.23431	0.2516	0.20265	0.17936	0.22934	0.28031	0.2625	0.239	0.1634	0.21399	0.21615	0.22636	0.21689	0.2267	0.20878	0.17304	0.21748	0.20901	0.17728	0.17013	0.18875	0.22298	0.25039	0.20259	0.18385
67.5	0.17353	0.16437	0.20169	0.22749	0.18483	0.1968	0.2527	0.2347	0.1797	0.18569	0.18785	0.2172	0.1997	0.25258	0.18924	0.2083	0.26115	0.20954	0.23552	0.18695	0.20452	0.21422	0.21349	0.26291	0.23194	0.25162	0.20181	0.17807	0.22859	0.27987	0.25969	0.23789	0.16213	0.2121	0.21505	0.2253	0.21588	0.22555	0.20754	0.17225	0.21562	0.20828	0.17668	0.16907	0.18765	0.22192	0.24851	0.20104	0.18353
67.6	0.17277	0.16306	0.20092	0.22632	0.18396	0.19518	0.25065	0.23566	0.1789	0.18491	0.1869	0.21587	0.20023	0.25243	0.18841	0.20719	0.25973	0.20928	0.23455	0.18642	0.20437	0.2132	0.21229	0.2611	0.22988	0.25168	0.20115	0.17728	0.22796	0.27927	0.25674	0.23702	0.1609	0.21015	0.21401	0.22436	0.21494	0.22442	0.20642	0.1716	0.21403	0.20766	0.1762	0.16805	0.18665	0.22101	0.24663	0.19972	0.18326
67.7	0.17204	0.16178	0.20024	0.2252	0.18309	0.1938	0.24884	0.22906	0.17822	0.18424	0.18599	0.21466	0.19683	0.25272	0.18761	0.20615	0.25843	0.20907	0.23358	0.18598	0.20428	0.21228	0.21122	0.25941	0.22811	0.25174	0.20068	0.17723	0.22746	0.27851	0.25373	0.23632	0.15973	0.20821	0.21304	0.22354	0.21406	0.22346	0.20552	0.17106	0.21265	0.20716	0.17582	0.16719	0.18575	0.22025	0.24487	0.19848	0.18306
67.8	0.17139	0.16059	0.19967	0.22418	0.18219	0.19267	0.24721	0.228	0.17763	0.18361	0.18514	0.21361	0.19403	0.25307	0.18423	0.20534	0.25724	0.20892	0.23271	0.18564	0.20422	0.21148	0.21026	0.25795	0.22633	0.25182	0.20034	0.17801	0.22705	0.27766	0.25102	0.23579	0.15864	0.2064	0.21205	0.22273	0.21326	0.22265	0.20489	0.17063	0.21138	0.20678	0.17556	0.16643	0.18491	0.21957	0.24338	0.19737	0.18295
67.9	0.17085	0.15947	0.1992	0.2232	0.18128	0.19172	0.24575	0.2273	0.17717	0.18305	0.18438	0.21271	0.19266	0.25355	0.18195	0.20468	0.25612	0.20877	0.23188	0.18535	0.20413	0.21077	0.20939	0.25669	0.22465	0.25186	0.20013	0.17918	0.22679	0.27675	0.24851	0.23533	0.15761	0.20472	0.21101	0.22195	0.21249	0.22201	0.20445	0.17028	0.21025	0.2065	0.1754	0.16572	0.18417	0.21896	0.24195	0.19631	0.1829
68	0.17035	0.15843	0.19878	0.22227	0.18031	0.1908	0.24428	0.22685	0.17678	0.18255	0.18373	0.21198	0.19172	0.2544	0.18084	0.20404	0.25514	0.20867	0.23123	0.18512	0.20403	0.2102	0.20859	0.25558	0.22296	0.25185	0.19999	0.1806	0.22665	0.27597	0.24612	0.23496	0.15669	0.20321	0.21008	0.22124	0.21179	0.22155	0.20413	0.17011	0.20931	0.20633	0.17531	0.16507	0.18347	0.21846	0.24059	0.19532	0.18292
68.1	0.16988	0.15738	0.19837	0.22148	0.17926	0.18996	0.24274	0.22695	0.17641	0.18213	0.18314	0.21135	0.191	0.25529	0.17999	0.20347	0.25432	0.20862	0.23075	0.1849	0.20393	0.20974	0.20781	0.25464	0.22151	0.25178	0.19989	0.18182	0.22662	0.27529	0.24419	0.23471	0.15585	0.20177	0.20924	0.22063	0.2112	0.22116	0.20388	0.16996	0.20853	0.20622	0.17527	0.1645	0.18288	0.21799	0.23932	0.19442	0.18298
68.2	0.16943	0.15642	0.19798	0.2209	0.17823	0.18912	0.24131	0.22831	0.17608	0.18171	0.18258	0.21076	0.19086	0.25464	0.17934	0.20295	0.25364	0.20861	0.2304	0.1847	0.20386	0.20932	0.20707	0.25386	0.22016	0.25164	0.19979	0.18095	0.22666	0.27465	0.24244	0.23453	0.15505	0.20043	0.20849	0.22009	0.21071	0.22081	0.20369	0.16985	0.20783	0.20618	0.17524	0.16403	0.18237	0.21754	0.23818	0.19355	0.18307
68.3	0.16902	0.15558	0.19759	0.22071	0.17727	0.18834	0.24005	0.2304	0.17578	0.18131	0.1821	0.21023	0.19198	0.25415	0.17913	0.20248	0.25301	0.20863	0.2301	0.18458	0.20379	0.20894	0.20635	0.25318	0.2189	0.25142	0.19967	0.17416	0.22676	0.27403	0.24081	0.23447	0.15424	0.19933	0.20788	0.21968	0.21031	0.22051	0.20354	0.16973	0.20719	0.20615	0.17519	0.1636	0.18192	0.21712	0.23703	0.19272	0.18316
68.4	0.16862	0.15489	0.1972	0.22072	0.17631	0.18764	0.23886	0.23269	0.1755	0.18091	0.18168	0.20969	0.19395	0.25417	0.17964	0.20211	0.25248	0.20863	0.22982	0.18446	0.20377	0.20865	0.20565	0.25258	0.21775	0.25119	0.19956	0.17235	0.22687	0.27345	0.2392	0.23451	0.15354	0.19838	0.2073	0.21934	0.20996	0.22023	0.2034	0.16954	0.20663	0.20611	0.17512	0.16321	0.18151	0.21672	0.23597	0.19199	0.18324
68.5	0.16826	0.15429	0.19683	0.22074	0.17545	0.187	0.23777	0.23467	0.17524	0.18052	0.18128	0.20919	0.19588	0.25462	0.18074	0.20186	0.25212	0.20864	0.22964	0.18436	0.20383	0.20842	0.20501	0.25201	0.21658	0.25098	0.19944	0.17116	0.22695	0.27279	0.23755	0.23456	0.15297	0.19755	0.20675	0.21911	0.2097	0.22002	0.20328	0.16927	0.20624	0.20606	0.17504	0.16284	0.18113	0.21633	0.23502	0.19135	0.18333
68.6	0.16791	0.15373	0.19647	0.22068	0.1747	0.18645	0.23694	0.23626	0.175	0.18016	0.18089	0.20873	0.19545	0.25577	0.18162	0.20168	0.25185	0.20865	0.22951	0.18429	0.20398	0.20827	0.20447	0.25144	0.21545	0.25079	0.19931	0.17035	0.22697	0.27205	0.23589	0.23459	0.15251	0.19678	0.20623	0.21895	0.20954	0.21985	0.2032	0.16896	0.20593	0.20599	0.17496	0.16248	0.18076	0.21595	0.23417	0.19076	0.18344
68.7	0.16757	0.15322	0.19613	0.22086	0.17399	0.18594	0.23639	0.23752	0.17477	0.17979	0.18054	0.20832	0.19331	0.25804	0.17834	0.20157	0.25162	0.20864	0.2294	0.18422	0.20425	0.20817	0.20408	0.25071	0.21441	0.25068	0.1992	0.16999	0.22696	0.27136	0.23432	0.23462	0.15214	0.19608	0.20582	0.21886	0.20947	0.21972	0.20317	0.16867	0.20565	0.2059	0.17487	0.16213	0.18042	0.2156	0.23343	0.19024	0.18363
68.8	0.16723	0.15275	0.19579	0.22108	0.17336	0.18547	0.23594	0.22905	0.17456	0.17946	0.1802	0.20792	0.19243	0.26061	0.17761	0.20149	0.25145	0.20861	0.2293	0.18414	0.20467	0.20813	0.20382	0.25009	0.21344	0.25062	0.19916	0.17047	0.22694	0.27073	0.23289	0.23464	0.15183	0.19547	0.20545	0.21883	0.20946	0.21966	0.20316	0.16839	0.20544	0.20579	0.17482	0.1618	0.18012	0.21527	0.23272	0.18975	0.18392
68.9	0.16691	0.15232	0.19548	0.22129	0.17277	0.18503	0.23561	0.22712	0.17435	0.17918	0.17991	0.20753	0.19192	0.26274	0.17719	0.2014	0.25129	0.20856	0.22919	0.18405	0.20516	0.20814	0.20366	0.24954	0.21255	0.25063	0.19919	0.17182	0.22696	0.27013	0.23154	0.23466	0.15152	0.19491	0.20512	0.21884	0.20949	0.21961	0.20322	0.16812	0.20526	0.20571	0.17489	0.16148	0.17987	0.21495	0.23202	0.18931	0.18433
69	0.16658	0.15195	0.19518	0.22156	0.17226	0.18464	0.23531	0.2261	0.17417	0.179	0.17965	0.20714	0.19153	0.26243	0.17692	0.20129	0.2511	0.20845	0.22907	0.18393	0.20565	0.20819	0.20362	0.24902	0.21177	0.25069	0.1993	0.17351	0.22703	0.26958	0.23011	0.23471	0.15123	0.19436	0.20476	0.21888	0.20957	0.21958	0.20342	0.16787	0.20511	0.20568	0.17512	0.16117	0.17969	0.2147	0.23135	0.18893	0.18486
69.1	0.16626	0.1516	0.19491	0.22179	0.17183	0.1843	0.2351	0.22553	0.17404	0.179	0.17942	0.20674	0.19135	0.26244	0.17684	0.20118	0.2509	0.20831	0.22892	0.18379	0.20625	0.20825	0.20383	0.2486	0.211	0.25079	0.1995	0.17566	0.22727	0.26908	0.22862	0.23478	0.15093	0.1938	0.20442	0.21894	0.20969	0.21952	0.20389	0.1677	0.20499	0.20573	0.17547	0.16091	0.17964	0.21453	0.23072	0.18857	0.1855
69.2	0.16596	0.1513	0.19465	0.22189	0.17145	0.18398	0.23496	0.22596	0.17398	0.17919	0.17927	0.20636	0.19164	0.26297	0.1773	0.20108	0.25071	0.20814	0.22876	0.18363	0.20681	0.20836	0.20395	0.24828	0.21033	0.25092	0.19982	0.17855	0.22773	0.26864	0.22721	0.2349	0.15065	0.19332	0.20417	0.21902	0.20981	0.21945	0.20439	0.1676	0.2049	0.20587	0.17584	0.16068	0.17979	0.21443	0.23015	0.18823	0.18618
69.3	0.1657	0.15101	0.19439	0.22191	0.1711	0.18368	0.23497	0.22877	0.17403	0.17943	0.17926	0.206	0.19238	0.26368	0.17838	0.20102	0.25051	0.20793	0.22857	0.18346	0.20744	0.20851	0.20396	0.24804	0.20976	0.25105	0.20019	0.18113	0.22839	0.26826	0.22581	0.23508	0.15042	0.19292	0.20393	0.2191	0.20996	0.2194	0.20474	0.16757	0.20483	0.20615	0.17635	0.16054	0.18008	0.21441	0.2296	0.18789	0.18692
69.4	0.16545	0.15072	0.19412	0.22184	0.17079	0.18338	0.23519	0.23247	0.17418	0.17984	0.17944	0.20566	0.19327	0.26455	0.17962	0.20103	0.25032	0.20765	0.2284	0.18328	0.20801	0.20868	0.20401	0.24792	0.20922	0.25117	0.20053	0.17792	0.22926	0.26797	0.22432	0.23543	0.15023	0.19251	0.20375	0.21917	0.21008	0.21935	0.20512	0.16763	0.2048	0.20658	0.177	0.16047	0.18056	0.21454	0.22905	0.18755	0.18766
69.5	0.16524	0.15044	0.19384	0.22162	0.17048	0.18301	0.2353	0.2361	0.17445	0.18034	0.17969	0.20533	0.19256	0.26619	0.18086	0.20115	0.25016	0.20731	0.22827	0.18311	0.2085	0.20888	0.20421	0.2478	0.2086	0.25126	0.20088	0.17392	0.23025	0.26773	0.22269	0.23588	0.15005	0.19211	0.20362	0.21924	0.21017	0.2193	0.20558	0.16776	0.2048	0.20709	0.17781	0.16043	0.18118	0.21468	0.22849	0.18723	0.18846
69.6	0.16504	0.15015	0.19355	0.22139	0.17017	0.18266	0.23529	0.2389	0.17471	0.1809	0.18008	0.20501	0.18968	0.26858	0.17902	0.20144	0.25003	0.20688	0.22822	0.18294	0.20908	0.20921	0.20441	0.24764	0.20797	0.25134	0.20123	0.17279	0.23139	0.26752	0.22088	0.23638	0.14991	0.1917	0.20355	0.21927	0.21023	0.21931	0.20621	0.16792	0.20483	0.20751	0.17876	0.16049	0.18179	0.21486	0.22794	0.18692	0.18935
69.7	0.16486	0.14988	0.19326	0.22113	0.16986	0.18229	0.23523	0.24086	0.17502	0.18151	0.18073	0.20468	0.18879	0.26935	0.17801	0.20184	0.24994	0.2063	0.22827	0.18278	0.20972	0.20969	0.20468	0.24746	0.20733	0.2514	0.20153	0.17224	0.23235	0.26731	0.21906	0.237	0.1498	0.19129	0.20353	0.2193	0.21026	0.21943	0.20702	0.16809	0.2049	0.20787	0.17993	0.16059	0.1824	0.21507	0.22737	0.18662	0.19029
69.8	0.1647	0.14961	0.19297	0.2209	0.16954	0.1819	0.23519	0.23354	0.17532	0.18217	0.1815	0.20437	0.18812	0.26908	0.17769	0.20236	0.24986	0.20542	0.22834	0.18263	0.21033	0.21023	0.20492	0.24724	0.20653	0.25146	0.20182	0.17189	0.23312	0.26705	0.21721	0.23785	0.14971	0.19088	0.20355	0.21937	0.21027	0.21961	0.20795	0.16826	0.20496	0.20833	0.181	0.16092	0.18307	0.21526	0.22678	0.18632	0.19122
69.9	0.16453	0.14936	0.19267	0.22073	0.16921	0.18149	0.23506	0.23136	0.17563	0.18276	0.18213	0.20407	0.18762	0.26919	0.17755	0.20292	0.24981	0.20428	0.22849	0.1825	0.21083	0.21076	0.20512	0.24695	0.20565	0.25149	0.20205	0.17178	0.23391	0.26676	0.21538	0.23873	0.14965	0.19046	0.2036	0.21947	0.21029	0.21979	0.20883	0.16843	0.20503	0.20896	0.18194	0.16138	0.18382	0.21545	0.22617	0.18601	0.19208
70	0.16436	0.14913	0.19237	0.22041	0.16889	0.18108	0.23495	0.23041	0.17592	0.18321	0.18269	0.20376	0.18748	0.2693	0.17772	0.20355	0.2498	0.20282	0.22864	0.1824	0.21125	0.21129	0.2052	0.24648	0.20469	0.25152	0.20221	0.17227	0.23473	0.26646	0.21362	0.23961	0.14961	0.19001	0.20368	0.21962	0.21028	0.21995	0.20964	0.1686	0.20509	0.20956	0.18277	0.16192	0.18456	0.21562	0.22554	0.18571	0.19286
70.1	0.16422	0.14892	0.19206	0.21996	0.16856	0.18063	0.23488	0.22987	0.17609	0.18352	0.18331	0.20346	0.18835	0.26939	0.17862	0.20422	0.24981	0.20099	0.22874	0.18231	0.21157	0.21174	0.20528	0.24567	0.20369	0.25152	0.20233	0.17343	0.23581	0.26613	0.21177	0.24045	0.14953	0.18953	0.20376	0.21978	0.21025	0.22012	0.21033	0.16877	0.20515	0.21009	0.18341	0.16237	0.18517	0.21576	0.2249	0.18539	0.19356
70.2	0.16405	0.14874	0.19173	0.21941	0.16819	0.18013	0.2347	0.22964	0.1762	0.18379	0.18381	0.20316	0.18963	0.26983	0.18002	0.2048	0.24983	0.1988	0.2288	0.18222	0.21184	0.21211	0.20531	0.24463	0.2025	0.25152	0.20238	0.17498	0.23712	0.26571	0.20986	0.24124	0.14935	0.18899	0.20384	0.21996	0.21021	0.22029	0.21088	0.16889	0.20523	0.21043	0.18398	0.16261	0.18578	0.21582	0.22427	0.18504	0.19422
70.3	0.16383	0.14854	0.19138	0.21875	0.16777	0.17959	0.23437	0.23013	0.17623	0.18391	0.18408	0.20285	0.19074	0.27106	0.18048	0.2053	0.24982	0.19639	0.22881	0.18213	0.21205	0.21239	0.20533	0.24348	0.2011	0.25153	0.2024	0.17618	0.238	0.26523	0.20789	0.24187	0.14906	0.18841	0.20391	0.22004	0.21017	0.22044	0.21131	0.16899	0.20531	0.21061	0.18443	0.16271	0.1861	0.21577	0.22359	0.18466	0.19493
70.4	0.16378	0.14831	0.19097	0.21805	0.16731	0.1789	0.23398	0.23128	0.17619	0.18387	0.18422	0.20254	0.19144	0.27286	0.17853	0.2057	0.24976	0.19404	0.22877	0.18203	0.21221	0.21258	0.20514	0.24206	0.19951	0.25152	0.20238	0.17714	0.23867	0.2647	0.20599	0.24236	0.14872	0.18779	0.20397	0.22007	0.21012	0.22062	0.21164	0.16905	0.20534	0.21069	0.18483	0.16274	0.18626	0.21559	0.22279	0.18424	0.19573
70.5	0.16388	0.14807	0.19042	0.21733	0.16677	0.17813	0.23347	0.2328	0.17611	0.18375	0.18422	0.20222	0.18965	0.27156	0.17776	0.20593	0.24963	0.19169	0.2287	0.18193	0.21234	0.21269	0.20477	0.2404	0.1977	0.25152	0.20236	0.17695	0.23918	0.2641	0.20398	0.24275	0.14832	0.187	0.20398	0.22009	0.21007	0.22079	0.2119	0.16901	0.20534	0.21072	0.18513	0.16266	0.18628	0.21537	0.22185	0.18379	0.19637
70.6	0.16371	0.14782	0.18969	0.21653	0.16612	0.17721	0.23271	0.23465	0.17599	0.18361	0.18411	0.20185	0.1846	0.27102	0.17734	0.20602	0.24937	0.18945	0.22863	0.18183	0.21248	0.21275	0.20429	0.23847	0.19583	0.25152	0.20235	0.1673	0.23953	0.26343	0.20188	0.24306	0.14787	0.18599	0.20398	0.22007	0.21004	0.22096	0.2121	0.1689	0.20533	0.2107	0.18529	0.16251	0.1862	0.2151	0.22073	0.18315	0.19686
70.7	0.16349	0.14756	0.18869	0.2156	0.16532	0.17612	0.2319	0.23659	0.17586	0.18343	0.18395	0.20144	0.18242	0.27074	0.17706	0.20602	0.24895	0.18737	0.22852	0.18175	0.21262	0.21277	0.20373	0.23631	0.19375	0.25149	0.20232	0.16539	0.23979	0.26266	0.19977	0.2433	0.14723	0.1848	0.20391	0.22005	0.21	0.22109	0.21219	0.1687	0.20533	0.21065	0.18535	0.1623	0.18606	0.2148	0.21945	0.18224	0.19724
70.8	0.16322	0.14728	0.18734	0.21457	0.16425	0.17485	0.23105	0.23653	0.1757	0.18319	0.18374	0.201	0.18108	0.27047	0.17683	0.20597	0.24834	0.18522	0.22823	0.18163	0.21275	0.21276	0.20314	0.23427	0.1915	0.2514	0.20219	0.16389	0.24003	0.26187	0.1977	0.24348	0.14636	0.18347	0.2037	0.22005	0.20987	0.22122	0.21218	0.16839	0.20535	0.21049	0.18539	0.16205	0.18584	0.21446	0.21803	0.18101	0.19756
70.9	0.16293	0.14696	0.18576	0.21351	0.16264	0.17325	0.23009	0.23012	0.17547	0.18292	0.18347	0.20039	0.18006	0.27018	0.17664	0.2059	0.24751	0.18281	0.22765	0.18129	0.21276	0.21267	0.20247	0.2324	0.18914	0.25114	0.20182	0.1627	0.24019	0.26078	0.19544	0.24362	0.14527	0.18178	0.2033	0.22005	0.20949	0.22126	0.21201	0.1679	0.20532	0.21009	0.1854	0.16177	0.18558	0.2141	0.21649	0.17936	0.19787
71	0.16262	0.14662	0.18392	0.21229	0.16063	0.17118	0.22901	0.2286	0.17519	0.18258	0.18317	0.19943	0.17922	0.26988	0.17665	0.20582	0.24647	0.18034	0.22652	0.18048	0.21256	0.21241	0.20163	0.23058	0.1865	0.25053	0.20109	0.16167	0.24011	0.25939	0.19295	0.24365	0.14382	0.17983	0.20259	0.21996	0.20883	0.22112	0.21157	0.16722	0.20514	0.20917	0.18539	0.16147	0.18528	0.21369	0.21468	0.17752	0.19814
71.1	0.16221	0.14621	0.18174	0.21086	0.15829	0.16883	0.22781	0.22753	0.17473	0.18222	0.18281	0.19815	0.17879	0.26944	0.17657	0.20559	0.24528	0.17793	0.22497	0.17921	0.21202	0.21174	0.20049	0.22831	0.18353	0.24943	0.19977	0.16081	0.23946	0.25781	0.1905	0.24337	0.14198	0.17767	0.20133	0.21953	0.20776	0.22067	0.21067	0.16635	0.20462	0.20745	0.18532	0.16115	0.18496	0.21312	0.21272	0.17536	0.19836
71.2	0.16163	0.14564	0.17923	0.20918	0.15584	0.16624	0.22646	0.22671	0.17405	0.18179	0.18222	0.19662	0.17882	0.26536	0.17254	0.20507	0.24381	0.17593	0.22302	0.17751	0.21095	0.21033	0.19923	0.2254	0.18042	0.24773	0.19782	0.16012	0.23816	0.25605	0.1881	0.24271	0.13999	0.17534	0.19949	0.21864	0.20621	0.21963	0.20949	0.16516	0.20349	0.20518	0.1851	0.16074	0.18456	0.21217	0.21065	0.17309	0.19838
71.3	0.16079	0.14473	0.1765	0.20742	0.15338	0.16335	0.22486	0.22597	0.17306	0.18118	0.18132	0.19477	0.17887	0.26086	0.17081	0.2041	0.24196	0.17384	0.22063	0.1754	0.20939	0.20816	0.19786	0.22194	0.1772	0.24544	0.1954	0.15955	0.23636	0.25393	0.18571	0.24153	0.13804	0.17301	0.19718	0.21737	0.20416	0.21786	0.208	0.16361	0.20163	0.20241	0.18456	0.16015	0.18398	0.21088	0.20858	0.17064	0.19795
71.4	0.1596	0.14326	0.1736	0.20562	0.15089	0.16043	0.22304	0.22553	0.17165	0.1802	0.18002	0.19267	0.17522	0.25832	0.16921	0.20262	0.23992	0.17144	0.21798	0.17299	0.20762	0.20539	0.19592	0.21836	0.17384	0.24274	0.19265	0.15902	0.23391	0.25157	0.18336	0.23973	0.13595	0.17054	0.19457	0.21567	0.20155	0.21553	0.20601	0.16196	0.19898	0.19929	0.1836	0.15934	0.18313	0.2093	0.20644	0.16792	0.19678
71.5	0.15795	0.14139	0.17085	0.20362	0.14842	0.15736	0.2209	0.22567	0.16991	0.17869	0.17813	0.19031	0.17155	0.25609	0.1677	0.20053	0.23761	0.16884	0.21531	0.1704	0.20566	0.2023	0.19348	0.21471	0.17041	0.23967	0.18959	0.1583	0.23046	0.24907	0.18079	0.23726	0.13377	0.16806	0.19174	0.21356	0.19866	0.21283	0.20295	0.16016	0.19594	0.19564	0.18227	0.15825	0.18188	0.20728	0.20416	0.16504	0.19482
71.6	0.15562	0.13917	0.16808	0.20149	0.14592	0.15425	0.21826	0.22591	0.16766	0.17651	0.17576	0.18788	0.16935	0.25385	0.16613	0.19778	0.23498	0.1663	0.21263	0.16755	0.20326	0.19889	0.19075	0.21091	0.16694	0.23628	0.18648	0.15699	0.22648	0.24634	0.17805	0.23438	0.13142	0.1656	0.18887	0.21095	0.19559	0.20966	0.19912	0.15828	0.19258	0.19164	0.18051	0.15679	0.18002	0.20497	0.20169	0.162	0.1923
71.7	0.15308	0.13678	0.16546	0.19934	0.14333	0.15112	0.21531	0.22576	0.16504	0.17383	0.17314	0.18534	0.16739	0.25166	0.16446	0.1947	0.23223	0.1636	0.20992	0.16456	0.2006	0.19536	0.1877	0.20694	0.1635	0.23282	0.18322	0.14366	0.22258	0.24325	0.17496	0.23128	0.129	0.16279	0.18593	0.20812	0.19245	0.20602	0.19483	0.1564	0.18881	0.1875	0.17827	0.15493	0.17786	0.20227	0.19907	0.15888	0.18938
71.8	0.15055	0.13422	0.16292	0.19716	0.14074	0.14794	0.2121	0.22316	0.16256	0.17124	0.17009	0.18262	0.16538	0.24757	0.16288	0.19094	0.22921	0.16105	0.20716	0.16134	0.19788	0.19192	0.1845	0.20274	0.16011	0.22921	0.18001	0.13822	0.21872	0.23994	0.17174	0.22811	0.12659	0.1598	0.18308	0.20514	0.18934	0.20269	0.19055	0.15458	0.18512	0.18322	0.17584	0.15277	0.1755	0.19926	0.19655	0.15574	0.18621
71.9	0.14786	0.13157	0.16034	0.19502	0.13828	0.14483	0.20875	0.21244	0.16025	0.16831	0.16641	0.18022	0.1634	0.23968	0.15891	0.18701	0.22603	0.15859	0.20428	0.15797	0.19519	0.1886	0.18122	0.19902	0.15682	0.22563	0.17719	0.1348	0.21491	0.23663	0.16851	0.22483	0.12429	0.15665	0.18017	0.20193	0.18604	0.19938	0.18668	0.15277	0.18158	0.17937	0.17313	0.15043	0.1729	0.19587	0.19407	0.15251	0.18268
72	0.14484	0.12866	0.15743	0.19287	0.13583	0.14146	0.20541	0.20929	0.1579	0.16492	0.16286	0.17802	0.16152	0.23573	0.15257	0.18321	0.22299	0.15602	0.20136	0.15459	0.19236	0.18511	0.17787	0.19544	0.1536	0.22214	0.17452	0.13217	0.21121	0.23326	0.16551	0.22142	0.12212	0.15373	0.17715	0.19871	0.18276	0.19593	0.18267	0.151	0.17816	0.17569	0.17009	0.14802	0.17036	0.19232	0.19175	0.14934	0.17886
72.1	0.14242	0.12581	0.15423	0.19068	0.13329	0.13796	0.20199	0.20666	0.15558	0.16158	0.15952	0.17576	0.15982	0.23292	0.14861	0.17956	0.2201	0.15325	0.1985	0.15127	0.18945	0.1813	0.17465	0.19215	0.15037	0.21878	0.17188	0.1299	0.20772	0.22996	0.16251	0.21798	0.1204	0.15086	0.17407	0.19551	0.1796	0.19266	0.17895	0.1491	0.17435	0.17193	0.16703	0.14533	0.1675	0.18862	0.18941	0.14618	0.17498
72.2	0.14023	0.12298	0.15087	0.1884	0.13059	0.1347	0.19862	0.20462	0.15329	0.15844	0.15653	0.17351	0.15796	0.2306	0.14588	0.17617	0.21727	0.15056	0.19566	0.14767	0.18661	0.17745	0.17128	0.18883	0.14716	0.21541	0.16913	0.12825	0.20402	0.22698	0.15946	0.21468	0.11873	0.14779	0.17095	0.19232	0.17669	0.18977	0.17551	0.14729	0.17098	0.16785	0.16431	0.14257	0.16456	0.18496	0.18692	0.14312	0.17113
72.3	0.13791	0.12019	0.1476	0.18619	0.12797	0.13195	0.19497	0.20338	0.15102	0.15569	0.1538	0.17122	0.15055	0.22856	0.14387	0.17282	0.21445	0.14803	0.19284	0.14391	0.18387	0.17366	0.16784	0.18558	0.14409	0.21215	0.16632	0.12717	0.2006	0.22406	0.15656	0.21155	0.11709	0.14495	0.16787	0.18898	0.17364	0.18702	0.17243	0.14516	0.16757	0.16384	0.16157	0.13996	0.16178	0.18099	0.18452	0.14019	0.16729
72.4	0.13545	0.11744	0.14458	0.184	0.12535	0.12947	0.19075	0.2035	0.14865	0.15314	0.15141	0.16881	0.14605	0.22677	0.14217	0.16946	0.21146	0.1455	0.18997	0.14066	0.18113	0.17012	0.16427	0.18226	0.14144	0.20913	0.16349	0.12653	0.19724	0.22127	0.15353	0.2086	0.11524	0.14229	0.16505	0.18574	0.17059	0.18404	0.16948	0.14311	0.16444	0.16007	0.15883	0.13756	0.15902	0.17752	0.1824	0.13748	0.16342
72.5	0.13282	0.11464	0.14199	0.18188	0.12269	0.12699	0.18651	0.20413	0.1465	0.15072	0.14909	0.16631	0.14328	0.22523	0.14072	0.16628	0.20871	0.14288	0.18711	0.13773	0.17852	0.16688	0.161	0.17919	0.13902	0.20623	0.16076	0.1259	0.19403	0.2187	0.15035	0.20568	0.1132	0.13961	0.16239	0.18266	0.1676	0.18096	0.16653	0.14141	0.16154	0.15673	0.15617	0.13537	0.15634	0.17447	0.18036	0.13473	0.15984
72.6	0.13032	0.11196	0.13982	0.17993	0.11999	0.12435	0.18246	0.20518	0.14462	0.14833	0.14683	0.16392	0.14126	0.22138	0.13948	0.16338	0.20617	0.14021	0.1844	0.13499	0.17616	0.16378	0.15778	0.17624	0.13681	0.20353	0.15813	0.12522	0.19112	0.21624	0.14765	0.20303	0.11115	0.13702	0.15995	0.1797	0.16478	0.17779	0.16366	0.13988	0.15885	0.15375	0.15353	0.13342	0.15402	0.1717	0.17828	0.132	0.15638
72.7	0.12794	0.10952	0.13789	0.17814	0.11748	0.12157	0.17879	0.20631	0.14285	0.14601	0.14485	0.16171	0.13951	0.21557	0.1383	0.16051	0.20377	0.13755	0.18205	0.1323	0.1741	0.16065	0.15462	0.17388	0.13434	0.20118	0.15574	0.12272	0.18705	0.2138	0.14522	0.20054	0.10927	0.13468	0.15772	0.17696	0.16208	0.17469	0.16103	0.13846	0.1561	0.15117	0.1511	0.1317	0.15179	0.16884	0.17605	0.12946	0.15328
72.8	0.12568	0.10732	0.1359	0.17626	0.11511	0.11894	0.17537	0.20727	0.14108	0.14389	0.14318	0.15959	0.13799	0.213	0.13444	0.15781	0.20129	0.13502	0.17988	0.12976	0.17207	0.1577	0.15173	0.17176	0.13193	0.19903	0.15351	0.11271	0.18352	0.21115	0.14298	0.19812	0.10733	0.13245	0.15564	0.17426	0.15948	0.17207	0.15857	0.13707	0.15323	0.14847	0.14884	0.13007	0.14971	0.16609	0.17396	0.12719	0.15025
72.9	0.12355	0.10532	0.13401	0.17432	0.11298	0.11645	0.17202	0.20364	0.1395	0.14195	0.14149	0.15739	0.13696	0.2109	0.12847	0.15524	0.19891	0.13292	0.17782	0.1272	0.17002	0.15504	0.14913	0.1693	0.12958	0.197	0.1513	0.10637	0.18074	0.20848	0.14093	0.19595	0.10542	0.13042	0.15355	0.17145	0.15721	0.16961	0.15637	0.13591	0.15065	0.14589	0.14664	0.12863	0.14774	0.16355	0.17198	0.125	0.1474
73	0.12158	0.10356	0.13214	0.1724	0.11093	0.11396	0.16875	0.19539	0.13793	0.14004	0.13984	0.15533	0.13643	0.20914	0.12604	0.15269	0.19673	0.131	0.1759	0.12463	0.16789	0.15269	0.1466	0.16694	0.12723	0.19506	0.14923	0.10344	0.17835	0.20608	0.13895	0.19386	0.10359	0.12843	0.15139	0.1688	0.15498	0.16733	0.15405	0.13495	0.14823	0.14353	0.14456	0.12716	0.14595	0.16107	0.17006	0.1229	0.14474
73.1	0.11992	0.10205	0.1303	0.1704	0.10904	0.11176	0.16552	0.19335	0.13662	0.13824	0.13808	0.15349	0.13448	0.20753	0.12416	0.15026	0.19461	0.12918	0.17407	0.12209	0.16562	0.15072	0.14409	0.1647	0.1249	0.1931	0.14726	0.10122	0.17624	0.20379	0.13688	0.19199	0.10194	0.1265	0.14924	0.16641	0.15267	0.16516	0.15143	0.13397	0.14588	0.14112	0.14271	0.12561	0.14415	0.15862	0.16816	0.12092	0.14219
73.2	0.11838	0.10082	0.12855	0.16833	0.10723	0.10988	0.1624	0.19192	0.13552	0.13663	0.13637	0.15178	0.13032	0.20614	0.12256	0.14797	0.19257	0.12748	0.17229	0.11969	0.16346	0.14898	0.14167	0.16231	0.12276	0.19113	0.14542	0.09953	0.17441	0.20163	0.13483	0.19002	0.10046	0.12456	0.14717	0.16403	0.1504	0.1634	0.149	0.13286	0.14359	0.13878	0.14104	0.12402	0.14244	0.15627	0.16618	0.11905	0.1397
73.3	0.11698	0.09972	0.1268	0.16626	0.10549	0.10812	0.15949	0.1909	0.13454	0.13528	0.13473	0.15022	0.12813	0.20501	0.12118	0.14573	0.19054	0.12578	0.17056	0.11743	0.16132	0.14735	0.13947	0.15976	0.12088	0.18921	0.14368	0.09859	0.17259	0.1994	0.13283	0.18803	0.09909	0.12259	0.14507	0.16165	0.14828	0.16168	0.14648	0.1318	0.14145	0.13681	0.1394	0.12247	0.14078	0.15339	0.16435	0.11713	0.13731
73.4	0.11573	0.09875	0.12498	0.1642	0.10374	0.1065	0.15668	0.1906	0.13374	0.13391	0.13313	0.14897	0.12665	0.19956	0.12005	0.14352	0.18853	0.12407	0.16888	0.11536	0.15908	0.14568	0.13729	0.15721	0.11922	0.1874	0.1421	0.09871	0.17093	0.19722	0.13091	0.18624	0.09771	0.12084	0.14289	0.15933	0.14646	0.15919	0.14407	0.13076	0.13965	0.13484	0.13782	0.1211	0.13919	0.1505	0.1626	0.11537	0.13508
73.5	0.11465	0.09782	0.12317	0.16209	0.10197	0.10476	0.15402	0.19127	0.13306	0.13253	0.13166	0.14788	0.1254	0.19656	0.11919	0.14139	0.1866	0.12237	0.16735	0.11354	0.1569	0.14395	0.13521	0.15474	0.1178	0.18576	0.14062	0.09945	0.16943	0.19513	0.12875	0.18462	0.09633	0.11927	0.14059	0.15722	0.14489	0.15692	0.14201	0.12968	0.13818	0.13288	0.13638	0.11974	0.13755	0.14771	0.16086	0.11374	0.13293
73.6	0.1137	0.09698	0.12139	0.16	0.10015	0.10294	0.15161	0.19287	0.13245	0.13127	0.13044	0.14677	0.12433	0.19468	0.11695	0.13919	0.18481	0.12069	0.16597	0.11191	0.15497	0.14224	0.13334	0.15254	0.11656	0.18424	0.1392	0.10015	0.16804	0.19317	0.12672	0.18316	0.09514	0.11782	0.1385	0.15523	0.1434	0.15468	0.14017	0.12859	0.1368	0.13092	0.13517	0.11836	0.13606	0.14516	0.15911	0.1123	0.13067
73.7	0.11283	0.09616	0.11986	0.15795	0.09833	0.1012	0.14934	0.19496	0.13193	0.13004	0.12923	0.14565	0.12369	0.19322	0.11239	0.13694	0.18308	0.119	0.16474	0.11054	0.1531	0.14055	0.13161	0.15065	0.11536	0.18298	0.13803	0.10047	0.16678	0.19106	0.12485	0.18154	0.09417	0.11644	0.13664	0.15315	0.14191	0.15253	0.13835	0.12753	0.13527	0.12928	0.1341	0.11697	0.13466	0.14297	0.15745	0.11094	0.12875
73.8	0.11198	0.09531	0.11839	0.15591	0.09674	0.09966	0.14713	0.1963	0.13145	0.12886	0.128	0.14453	0.12355	0.19201	0.11051	0.13493	0.18138	0.11754	0.16355	0.10916	0.15137	0.13874	0.12981	0.14882	0.11399	0.18172	0.13696	0.08745	0.16569	0.18902	0.123	0.18002	0.09337	0.11508	0.13483	0.15116	0.14048	0.15045	0.13609	0.12643	0.13368	0.12767	0.13287	0.11567	0.13322	0.14091	0.15565	0.10971	0.12693
73.9	0.11111	0.0945	0.11685	0.15411	0.0954	0.09823	0.14498	0.1957	0.13103	0.12782	0.12678	0.14331	0.11853	0.19098	0.10906	0.13298	0.17966	0.11633	0.16246	0.10767	0.14981	0.137	0.12797	0.1472	0.1125	0.18041	0.13591	0.06595	0.16471	0.18708	0.12112	0.1787	0.09271	0.11371	0.13312	0.14912	0.13908	0.14853	0.13366	0.1253	0.13209	0.12601	0.1315	0.11453	0.13186	0.13921	0.15381	0.10845	0.12534
74	0.11024	0.09366	0.11537	0.15249	0.09411	0.09664	0.14282	0.19062	0.13065	0.1268	0.12566	0.14204	0.11625	0.18983	0.10792	0.13114	0.17797	0.11507	0.16141	0.10644	0.14842	0.13533	0.12609	0.14567	0.11094	0.17906	0.13494	0.06045	0.16355	0.18496	0.11926	0.17742	0.09201	0.11245	0.13143	0.147	0.13753	0.14664	0.1313	0.12414	0.13062	0.12436	0.13009	0.11351	0.1305	0.13752	0.15196	0.10722	0.12394
74.1	0.10937	0.09275	0.11397	0.15089	0.0927	0.09509	0.14059	0.18766	0.1303	0.12573	0.12458	0.14073	0.11505	0.1858	0.10706	0.12932	0.17631	0.11365	0.16035	0.10536	0.14713	0.13362	0.12425	0.14393	0.10949	0.17767	0.13401	0.05719	0.16237	0.18294	0.11745	0.17612	0.09126	0.11127	0.12967	0.14478	0.13594	0.14479	0.12881	0.12311	0.12927	0.12291	0.12872	0.11253	0.12918	0.13581	0.15004	0.10588	0.12271
74.2	0.10854	0.09181	0.11259	0.14923	0.09133	0.09357	0.13842	0.18627	0.12998	0.12453	0.12358	0.13953	0.11414	0.18332	0.10657	0.12744	0.17458	0.11238	0.15914	0.10437	0.14585	0.13203	0.12237	0.14208	0.10806	0.17625	0.13297	0.05554	0.16119	0.1809	0.11568	0.17477	0.09054	0.11008	0.12784	0.14246	0.13443	0.14307	0.12641	0.122	0.12802	0.12139	0.12736	0.11161	0.12778	0.1342	0.14802	0.10443	0.1214
74.3	0.10773	0.09091	0.11113	0.14757	0.09012	0.09215	0.1362	0.18522	0.12968	0.12327	0.12252	0.13836	0.11333	0.18155	0.10529	0.12566	0.17284	0.11124	0.15784	0.10354	0.14446	0.13035	0.12072	0.14031	0.1066	0.17489	0.13191	0.05619	0.15982	0.17885	0.11395	0.17323	0.08979	0.10876	0.12597	0.14001	0.13288	0.14144	0.12374	0.12105	0.12687	0.11983	0.12603	0.11061	0.12633	0.1325	0.14603	0.10308	0.12016
74.4	0.10694	0.09014	0.10967	0.14586	0.08895	0.09088	0.13404	0.18453	0.1294	0.12213	0.12144	0.13705	0.11301	0.18011	0.10128	0.12393	0.17116	0.11014	0.15656	0.10268	0.143	0.12871	0.11905	0.13847	0.10514	0.17349	0.1308	0.05846	0.15837	0.17692	0.11225	0.17138	0.08901	0.10743	0.12413	0.13778	0.13134	0.13973	0.12152	0.12026	0.12566	0.11813	0.12449	0.10965	0.12496	0.13061	0.14419	0.10182	0.11872
74.5	0.10609	0.08943	0.10821	0.14415	0.08784	0.08961	0.13192	0.18439	0.12913	0.12107	0.12032	0.1359	0.11339	0.17892	0.09882	0.12223	0.1695	0.10909	0.15547	0.10185	0.14167	0.12694	0.11741	0.13669	0.10395	0.17208	0.12966	0.06136	0.15696	0.17509	0.11065	0.16947	0.08831	0.1062	0.12244	0.13557	0.12983	0.13773	0.11982	0.11946	0.12437	0.11656	0.12287	0.10863	0.12367	0.1287	0.14249	0.10061	0.11738
74.6	0.10525	0.08879	0.10686	0.14243	0.08675	0.08842	0.12975	0.18487	0.12885	0.1201	0.11931	0.13485	0.1137	0.17814	0.09749	0.12061	0.16786	0.10806	0.15454	0.10113	0.14036	0.12523	0.11572	0.13505	0.10286	0.17061	0.12845	0.06448	0.15564	0.17333	0.10912	0.16768	0.08771	0.10497	0.12074	0.13331	0.12852	0.13581	0.11837	0.11873	0.12307	0.11501	0.12148	0.1076	0.12243	0.12676	0.14074	0.09943	0.11616
74.7	0.1044	0.08817	0.10567	0.14075	0.08572	0.08719	0.12765	0.18591	0.12855	0.11912	0.11826	0.13391	0.11387	0.17641	0.0964	0.11901	0.1661	0.10712	0.15377	0.10059	0.13894	0.12368	0.11391	0.13366	0.1018	0.16911	0.12719	0.06707	0.15442	0.17157	0.10755	0.16596	0.08724	0.10382	0.11875	0.13104	0.12715	0.13399	0.11686	0.11797	0.12163	0.11351	0.12012	0.10653	0.1213	0.12472	0.13888	0.09826	0.11501
74.8	0.10354	0.08756	0.10449	0.13908	0.0847	0.08608	0.1255	0.18528	0.12826	0.11809	0.11745	0.133	0.10996	0.1725	0.09548	0.11731	0.16418	0.10626	0.15324	0.09993	0.13753	0.12212	0.11219	0.13232	0.1008	0.16775	0.12593	0.0691	0.1531	0.16976	0.10596	0.16422	0.08677	0.10264	0.11686	0.12875	0.12574	0.13254	0.11534	0.11717	0.12024	0.11211	0.11884	0.10551	0.12018	0.12272	0.13685	0.09714	0.11378
74.9	0.10275	0.08693	0.10328	0.13735	0.08365	0.08499	0.12339	0.17723	0.12804	0.117	0.11665	0.13206	0.10756	0.17013	0.09481	0.11538	0.16201	0.10536	0.15277	0.09911	0.13617	0.12058	0.1105	0.13115	0.09979	0.16642	0.12468	0.07057	0.15157	0.16781	0.10441	0.16247	0.08627	0.10135	0.11512	0.12635	0.12442	0.13129	0.11417	0.11626	0.11905	0.11085	0.11768	0.10458	0.11907	0.12066	0.13465	0.09603	0.11257
75	0.10206	0.08631	0.10218	0.13564	0.08255	0.08387	0.12139	0.17546	0.12784	0.11595	0.11569	0.13119	0.10652	0.16861	0.09441	0.11334	0.15978	0.10445	0.15219	0.09801	0.13478	0.11906	0.10878	0.12993	0.09884	0.16506	0.12367	0.07149	0.15011	0.16565	0.10288	0.16067	0.08571	0.09985	0.11342	0.12406	0.12323	0.12998	0.11292	0.11535	0.11792	0.10931	0.11657	0.10359	0.11805	0.11852	0.13242	0.09496	0.11148
75.1	0.10135	0.08565	0.10115	0.13398	0.08139	0.08265	0.11954	0.17412	0.12759	0.11483	0.11462	0.13035	0.10567	0.16725	0.09405	0.1114	0.15748	0.10346	0.15137	0.0967	0.13327	0.1175	0.10707	0.12878	0.09789	0.16368	0.12266	0.07209	0.1486	0.16315	0.10152	0.15875	0.08509	0.09839	0.11189	0.12187	0.12208	0.12841	0.11164	0.11458	0.11672	0.10735	0.11563	0.10269	0.11706	0.11632	0.13029	0.09396	0.11043
75.2	0.10065	0.08494	0.09999	0.13221	0.08025	0.08126	0.11768	0.17309	0.12717	0.11361	0.11343	0.12938	0.10512	0.16596	0.08796	0.10941	0.15487	0.10244	0.15012	0.09532	0.13179	0.116	0.10533	0.12755	0.09694	0.16224	0.12157	0.07233	0.14711	0.16072	0.10035	0.15683	0.08448	0.09704	0.11034	0.11968	0.12095	0.1266	0.10975	0.11397	0.11546	0.10564	0.11472	0.10182	0.11604	0.11395	0.12834	0.09298	0.10943
75.3	0.09988	0.08418	0.09881	0.13036	0.07901	0.07988	0.11576	0.17256	0.12677	0.11237	0.11195	0.12845	0.10501	0.16471	0.08578	0.10746	0.15186	0.10139	0.14854	0.09377	0.13025	0.11451	0.10353	0.12617	0.09601	0.16055	0.1204	0.07231	0.14564	0.15834	0.09918	0.15496	0.0839	0.09574	0.10885	0.11752	0.11998	0.12468	0.10777	0.11347	0.11419	0.10426	0.11374	0.10089	0.11495	0.11167	0.12638	0.09192	0.10838
75.4	0.09907	0.08337	0.09755	0.12875	0.07771	0.07866	0.11383	0.17252	0.1263	0.11116	0.11056	0.12732	0.10538	0.16363	0.08406	0.10548	0.14874	0.1001	0.14668	0.09213	0.12858	0.1129	0.1017	0.12458	0.09511	0.15845	0.11923	0.07214	0.14413	0.15598	0.09802	0.15307	0.08323	0.09447	0.10733	0.11543	0.1189	0.12279	0.1056	0.1128	0.11287	0.10306	0.11272	0.09986	0.11377	0.10958	0.12447	0.0908	0.10725
75.5	0.09821	0.0825	0.09618	0.12719	0.07625	0.07759	0.11179	0.17267	0.12577	0.10987	0.10924	0.12584	0.10434	0.16009	0.08261	0.10343	0.14546	0.09873	0.14439	0.09049	0.12677	0.11126	0.0999	0.12291	0.09413	0.15619	0.1181	0.07186	0.14261	0.15371	0.09675	0.15114	0.0825	0.09331	0.10594	0.11336	0.11781	0.12097	0.10338	0.11191	0.11154	0.10194	0.11161	0.09876	0.11263	0.10763	0.12255	0.0896	0.10604
75.6	0.09727	0.08162	0.09479	0.12556	0.07474	0.07642	0.10968	0.173	0.12521	0.10849	0.10791	0.12406	0.10002	0.15651	0.08136	0.10138	0.14238	0.09716	0.14197	0.08886	0.12494	0.10964	0.09817	0.12116	0.09293	0.15405	0.11692	0.0715	0.14106	0.15135	0.09544	0.14897	0.08168	0.09214	0.10451	0.11123	0.11668	0.11901	0.10107	0.11087	0.11026	0.10077	0.11057	0.09764	0.11151	0.10557	0.12071	0.08844	0.10459
75.7	0.09621	0.08065	0.09339	0.12387	0.07321	0.07515	0.10765	0.17322	0.12452	0.10712	0.10649	0.12217	0.09872	0.15465	0.08038	0.09922	0.13953	0.09543	0.13958	0.08726	0.1229	0.10818	0.09639	0.11957	0.09161	0.15183	0.11558	0.07106	0.13949	0.14892	0.09404	0.1468	0.08085	0.09096	0.10292	0.10908	0.11541	0.11729	0.09888	0.10975	0.1091	0.0995	0.10955	0.09626	0.11028	0.10344	0.1188	0.0872	0.10291
75.8	0.09496	0.07953	0.09187	0.12213	0.07172	0.07384	0.10556	0.16093	0.12382	0.10569	0.10501	0.1203	0.09775	0.15305	0.07967	0.09706	0.13694	0.09394	0.13727	0.08568	0.12085	0.10665	0.09465	0.11797	0.09023	0.14944	0.11408	0.07059	0.13775	0.14644	0.0926	0.14457	0.07999	0.08983	0.10131	0.10691	0.11408	0.11562	0.09686	0.10848	0.10806	0.09825	0.10848	0.09472	0.1088	0.10135	0.11672	0.08597	0.10114
75.9	0.0935	0.07838	0.09026	0.12027	0.0699	0.07256	0.10354	0.15817	0.12312	0.10416	0.10355	0.1186	0.09688	0.15147	0.07691	0.09493	0.13454	0.09249	0.13508	0.08419	0.11877	0.10491	0.09292	0.11624	0.08881	0.14715	0.1124	0.07006	0.13596	0.14395	0.09119	0.14219	0.07904	0.08864	0.09973	0.10473	0.11266	0.11402	0.09509	0.10722	0.10696	0.09699	0.10739	0.0935	0.10727	0.09915	0.11468	0.08476	0.09916
76	0.0919	0.07726	0.08848	0.11828	0.06805	0.07129	0.10158	0.15585	0.12235	0.10268	0.10213	0.11679	0.09626	0.1504	0.07258	0.09279	0.1322	0.09102	0.13312	0.08284	0.1169	0.10303	0.09116	0.11423	0.0873	0.14494	0.1107	0.06943	0.13407	0.14155	0.08971	0.13978	0.07803	0.08728	0.09787	0.1027	0.11106	0.11244	0.09354	0.10599	0.10564	0.0958	0.10601	0.09218	0.10575	0.0971	0.11253	0.08341	0.09732
76.1	0.09024	0.07622	0.08672	0.1163	0.06636	0.06992	0.09964	0.15379	0.12136	0.1011	0.10064	0.11495	0.09588	0.14998	0.07039	0.09081	0.1298	0.08966	0.13119	0.08156	0.11528	0.10122	0.08935	0.11217	0.08577	0.14283	0.10899	0.06878	0.13221	0.13904	0.08828	0.13753	0.07695	0.08577	0.09592	0.10062	0.1094	0.11086	0.09193	0.10464	0.10403	0.09461	0.10437	0.09066	0.10431	0.09515	0.11038	0.08204	0.09542
76.2	0.08878	0.0752	0.08495	0.11433	0.0647	0.06849	0.09779	0.15208	0.12039	0.09948	0.09897	0.11316	0.0959	0.14659	0.06906	0.08898	0.12738	0.08821	0.12938	0.08022	0.11356	0.09938	0.08751	0.1102	0.08415	0.14081	0.10721	0.06817	0.13049	0.13665	0.08689	0.13521	0.07582	0.08421	0.09387	0.09847	0.10769	0.1094	0.09027	0.10318	0.10216	0.09336	0.10244	0.08929	0.10292	0.0931	0.10819	0.08074	0.09355
76.3	0.08739	0.07412	0.08321	0.11244	0.06298	0.06697	0.09597	0.15139	0.11929	0.0979	0.09717	0.1115	0.09507	0.1425	0.06806	0.08719	0.12512	0.08671	0.12747	0.07883	0.11178	0.09733	0.0859	0.10829	0.08262	0.13884	0.1056	0.06759	0.12884	0.13426	0.08547	0.13284	0.07457	0.08273	0.09176	0.0962	0.10599	0.10798	0.08843	0.10176	0.10043	0.09208	0.10054	0.088	0.10158	0.09126	0.10623	0.07954	0.09169
76.4	0.08588	0.07298	0.08157	0.11066	0.06142	0.06531	0.09416	0.15089	0.11807	0.09619	0.0955	0.10994	0.0902	0.14075	0.06741	0.08516	0.12271	0.08537	0.12556	0.07749	0.1097	0.09516	0.08423	0.10634	0.08127	0.13681	0.10396	0.06699	0.12719	0.13189	0.08393	0.13061	0.07323	0.08125	0.08984	0.09386	0.10423	0.10639	0.08669	0.10031	0.09877	0.09082	0.09908	0.08688	0.10009	0.08951	0.1043	0.07846	0.08978
76.5	0.08431	0.0719	0.07995	0.10879	0.06006	0.06364	0.09212	0.1508	0.11653	0.09449	0.09403	0.10843	0.08828	0.1393	0.06727	0.08327	0.12016	0.08421	0.12371	0.07621	0.10784	0.09304	0.08251	0.10447	0.08001	0.13464	0.10232	0.06629	0.12548	0.12943	0.08248	0.12822	0.07193	0.07986	0.08789	0.09151	0.1025	0.10454	0.08505	0.0989	0.09715	0.08972	0.09729	0.08576	0.09844	0.08758	0.10226	0.0774	0.08808
76.6	0.0827	0.07088	0.07839	0.10687	0.05875	0.06212	0.08998	0.15034	0.11476	0.09279	0.09263	0.10682	0.08698	0.13781	0.06737	0.08158	0.11757	0.08304	0.12199	0.07488	0.10625	0.09108	0.08086	0.10253	0.07885	0.13233	0.10067	0.06549	0.12365	0.12715	0.08104	0.12586	0.07063	0.07845	0.086	0.0892	0.10089	0.10276	0.08329	0.09751	0.09547	0.08861	0.0955	0.08461	0.09687	0.0855	0.10024	0.07631	0.08673
76.7	0.08088	0.06978	0.07688	0.10485	0.05739	0.06048	0.0878	0.13725	0.1126	0.09112	0.09122	0.10529	0.08588	0.13634	0.06677	0.08008	0.11512	0.08164	0.12017	0.07355	0.10491	0.08919	0.07918	0.10056	0.07764	0.12987	0.0992	0.06456	0.12179	0.12506	0.07964	0.12365	0.06938	0.07705	0.0841	0.08694	0.09929	0.10112	0.08152	0.09618	0.09368	0.08746	0.09371	0.08334	0.0954	0.08335	0.0982	0.07502	0.08556
76.8	0.07912	0.06866	0.07544	0.10303	0.05596	0.05878	0.08572	0.13073	0.11003	0.08946	0.08971	0.10383	0.08495	0.13501	0.06159	0.07863	0.11258	0.08019	0.11823	0.07232	0.10362	0.08761	0.07735	0.09844	0.07643	0.12735	0.09779	0.06354	0.11983	0.12293	0.07839	0.12151	0.0681	0.07553	0.08238	0.08486	0.09767	0.09938	0.08	0.09437	0.09173	0.0861	0.09195	0.08182	0.09394	0.0812	0.09611	0.07353	0.08426
76.9	0.07745	0.06769	0.07402	0.10133	0.05462	0.05713	0.08369	0.12717	0.10737	0.08762	0.08795	0.10234	0.08433	0.13029	0.05985	0.0773	0.11005	0.07876	0.11613	0.07113	0.10239	0.08615	0.07562	0.0963	0.07503	0.12474	0.09641	0.06239	0.11767	0.12073	0.07726	0.11932	0.06698	0.074	0.08069	0.08305	0.09602	0.09738	0.07823	0.09238	0.08974	0.08463	0.09019	0.08029	0.09223	0.0792	0.09393	0.07202	0.08262
77	0.07592	0.06669	0.07263	0.09954	0.05331	0.05542	0.08179	0.12424	0.10478	0.08567	0.08614	0.1008	0.08408	0.12569	0.05852	0.07592	0.10739	0.07739	0.11404	0.06991	0.10105	0.08441	0.07399	0.09406	0.07342	0.12207	0.09479	0.06124	0.11559	0.11859	0.07622	0.117	0.06586	0.07251	0.07886	0.08136	0.09428	0.09522	0.07637	0.09048	0.08783	0.08321	0.08844	0.07854	0.09045	0.07718	0.09193	0.07045	0.08079
77.1	0.07445	0.06559	0.07126	0.09752	0.05193	0.05352	0.07981	0.12179	0.10198	0.08385	0.08436	0.0992	0.08356	0.12346	0.0574	0.07457	0.10472	0.07612	0.11191	0.06864	0.0996	0.0825	0.07225	0.09218	0.07179	0.11935	0.0931	0.06007	0.11353	0.11638	0.07503	0.11454	0.06463	0.07099	0.07722	0.07963	0.09264	0.0931	0.07485	0.089	0.08616	0.08144	0.08665	0.07662	0.08876	0.07517	0.09002	0.06895	0.0787
77.2	0.07289	0.06433	0.06997	0.09542	0.05051	0.0517	0.07772	0.12051	0.09924	0.08193	0.0826	0.09753	0.07925	0.12155	0.0565	0.07326	0.10194	0.07474	0.1097	0.06751	0.09815	0.08057	0.07059	0.09044	0.07018	0.11667	0.09134	0.05886	0.11138	0.11401	0.07362	0.11191	0.06322	0.06941	0.07563	0.07783	0.09118	0.09092	0.07353	0.08785	0.08444	0.07938	0.08484	0.07464	0.08714	0.07327	0.08803	0.06746	0.07627
77.3	0.07129	0.06304	0.06852	0.09341	0.04908	0.04989	0.07556	0.12052	0.09646	0.08	0.08099	0.09572	0.07498	0.11982	0.05568	0.07183	0.09906	0.07325	0.10743	0.06646	0.09659	0.07863	0.06884	0.08869	0.06869	0.11398	0.08941	0.05779	0.10903	0.11151	0.07208	0.10926	0.06173	0.06775	0.07403	0.07599	0.08963	0.08859	0.07225	0.08657	0.08303	0.07733	0.08318	0.07275	0.08545	0.07138	0.08573	0.066	0.07377
77.4	0.06966	0.06177	0.06677	0.0914	0.04767	0.04827	0.0733	0.12078	0.09338	0.07801	0.07929	0.09383	0.07316	0.11856	0.05513	0.07021	0.09622	0.07168	0.10552	0.06524	0.09502	0.07676	0.06689	0.08681	0.06708	0.11138	0.08739	0.05663	0.10659	0.10897	0.07052	0.10661	0.06009	0.06613	0.07238	0.07432	0.08795	0.08628	0.07092	0.08521	0.0818	0.07535	0.08128	0.0709	0.08372	0.0695	0.08354	0.06455	0.07129
77.5	0.068	0.06036	0.06502	0.08933	0.04616	0.04668	0.07104	0.12079	0.09012	0.07602	0.0776	0.09183	0.0718	0.11718	0.05091	0.0683	0.09335	0.0701	0.10394	0.06382	0.09334	0.0748	0.06475	0.08496	0.06549	0.10893	0.08538	0.05544	0.10419	0.10619	0.06895	0.10406	0.05858	0.0644	0.07062	0.07265	0.08608	0.08385	0.06978	0.08401	0.08053	0.07364	0.07957	0.06911	0.082	0.06782	0.08141	0.06306	0.06891
77.6	0.06628	0.05902	0.06334	0.08721	0.04477	0.04512	0.06887	0.12034	0.08678	0.07413	0.07591	0.08982	0.07081	0.1133	0.04685	0.06649	0.09045	0.06857	0.10254	0.0623	0.09157	0.0728	0.06272	0.08287	0.06371	0.10655	0.08329	0.05414	0.10179	0.10352	0.0673	0.10159	0.05712	0.06269	0.06894	0.07084	0.08421	0.08132	0.06865	0.08254	0.07916	0.07216	0.07807	0.06736	0.08015	0.06603	0.07938	0.06153	0.06661
77.7	0.06465	0.05752	0.06164	0.08515	0.04337	0.04361	0.06684	0.1088	0.08352	0.07217	0.07441	0.08769	0.07013	0.10876	0.04478	0.06476	0.08752	0.06713	0.10104	0.06078	0.08964	0.07083	0.06087	0.0806	0.0618	0.10417	0.08126	0.05272	0.09937	0.10096	0.06559	0.0991	0.05558	0.06099	0.06723	0.06898	0.08221	0.07889	0.0675	0.08087	0.07762	0.07078	0.0765	0.0656	0.07825	0.06419	0.07754	0.05993	0.06423
77.8	0.06309	0.0559	0.0599	0.08308	0.0419	0.04199	0.06477	0.10265	0.08019	0.07027	0.07268	0.08556	0.06998	0.10657	0.04311	0.06292	0.08449	0.06572	0.09932	0.05924	0.08757	0.06882	0.05917	0.07864	0.05994	0.10171	0.0791	0.05149	0.09688	0.09861	0.06392	0.09664	0.05405	0.05943	0.06549	0.06703	0.08027	0.07655	0.06637	0.07907	0.07597	0.06953	0.07486	0.06393	0.07651	0.06252	0.07567	0.05845	0.06172
77.9	0.06152	0.05416	0.05838	0.08089	0.04061	0.04028	0.06268	0.09907	0.07686	0.06832	0.07095	0.08346	0.07035	0.10456	0.04182	0.06102	0.08167	0.06411	0.09749	0.05779	0.08542	0.06672	0.05753	0.07693	0.05827	0.09916	0.07695	0.05037	0.09432	0.09641	0.06229	0.09416	0.05251	0.05788	0.06367	0.0649	0.07844	0.07427	0.0651	0.07708	0.07432	0.0683	0.07332	0.06237	0.07486	0.06105	0.0739	0.05708	0.05948
78	0.05992	0.0525	0.05688	0.07848	0.03943	0.03864	0.06064	0.09629	0.07368	0.06631	0.06934	0.08136	0.06502	0.10258	0.04091	0.05908	0.07895	0.06251	0.09566	0.05625	0.0832	0.06459	0.05587	0.07526	0.05672	0.0967	0.07486	0.04926	0.09185	0.09405	0.06072	0.09176	0.05101	0.05638	0.06174	0.0627	0.07675	0.07187	0.06393	0.07506	0.07281	0.06677	0.07154	0.06075	0.07318	0.05953	0.07205	0.05578	0.05744
78.1	0.05826	0.05094	0.05539	0.07628	0.03807	0.03727	0.05844	0.09411	0.07068	0.06431	0.06779	0.07935	0.0621	0.10105	0.04072	0.05727	0.0763	0.0609	0.09378	0.05468	0.08115	0.06232	0.05423	0.07361	0.05529	0.09425	0.07276	0.04811	0.08942	0.09165	0.05914	0.08935	0.04951	0.05484	0.05976	0.06072	0.07504	0.06973	0.0625	0.07319	0.07128	0.06512	0.06963	0.05904	0.07138	0.05776	0.0699	0.05451	0.05533
78.2	0.05668	0.04937	0.05404	0.07418	0.03678	0.03608	0.05632	0.093	0.0679	0.06238	0.06632	0.07724	0.06045	0.10017	0.04065	0.05543	0.07381	0.05929	0.09182	0.05312	0.07921	0.06008	0.05268	0.07218	0.05395	0.0917	0.07092	0.04707	0.087	0.08923	0.0577	0.08712	0.04795	0.05334	0.05784	0.05872	0.07322	0.06795	0.0608	0.0714	0.06975	0.0637	0.06791	0.0573	0.06963	0.05585	0.06759	0.0531	0.0532
78.3	0.05523	0.04798	0.05279	0.0721	0.03561	0.03489	0.0543	0.09303	0.06519	0.06069	0.0647	0.07512	0.05916	0.09546	0.03612	0.05363	0.07154	0.05776	0.0899	0.05139	0.07741	0.05797	0.05119	0.07066	0.05261	0.08913	0.06918	0.04604	0.08469	0.08691	0.05634	0.08508	0.04626	0.052	0.05609	0.05681	0.07139	0.06594	0.05891	0.06958	0.0681	0.06256	0.06646	0.05555	0.06788	0.05394	0.06557	0.05168	0.05148
78.4	0.05381	0.04679	0.05155	0.07009	0.03444	0.03364	0.05227	0.09309	0.06278	0.05908	0.06306	0.0734	0.05825	0.09169	0.03409	0.05182	0.06942	0.05616	0.08792	0.04955	0.07557	0.05587	0.04974	0.06892	0.05122	0.08694	0.06745	0.04509	0.08231	0.08485	0.05512	0.08324	0.04458	0.05071	0.05468	0.05509	0.06945	0.06385	0.05723	0.06779	0.06655	0.06145	0.06506	0.05401	0.06608	0.0522	0.06409	0.05023	0.04985
78.5	0.05241	0.04565	0.05032	0.06802	0.03337	0.03243	0.05015	0.09281	0.0605	0.05747	0.06144	0.07182	0.05788	0.08946	0.03288	0.04998	0.06736	0.05419	0.08583	0.04775	0.07373	0.05354	0.0483	0.06701	0.04982	0.08494	0.06574	0.04434	0.08003	0.08294	0.05398	0.08165	0.04304	0.04944	0.05354	0.05343	0.06775	0.06174	0.05588	0.06625	0.06511	0.06034	0.06387	0.05248	0.06439	0.05057	0.06267	0.0488	0.0485
78.6	0.0511	0.04446	0.0491	0.0661	0.03225	0.0313	0.04813	0.08326	0.05816	0.05594	0.05984	0.07008	0.05797	0.08783	0.03207	0.04797	0.06516	0.05214	0.08359	0.04609	0.07189	0.05113	0.04689	0.06487	0.04842	0.0829	0.0641	0.04375	0.07792	0.08096	0.05263	0.08003	0.04173	0.0481	0.05235	0.05189	0.06619	0.05977	0.0546	0.0648	0.06352	0.05898	0.06291	0.051	0.06294	0.04906	0.06111	0.04743	0.04723
78.7	0.0499	0.04342	0.04788	0.06419	0.03094	0.03017	0.04622	0.07706	0.05617	0.05443	0.05823	0.06804	0.05511	0.08649	0.03146	0.04564	0.06287	0.05019	0.08119	0.04456	0.07009	0.04848	0.0455	0.06271	0.04712	0.08072	0.0625	0.04315	0.07588	0.07889	0.05128	0.07849	0.04069	0.04669	0.05122	0.05049	0.0647	0.05795	0.05319	0.06338	0.06197	0.05736	0.06164	0.04945	0.06144	0.04772	0.05935	0.04601	0.04586
78.8	0.04862	0.04248	0.0467	0.0623	0.0297	0.02903	0.04438	0.07424	0.05405	0.05272	0.0566	0.06578	0.05091	0.08566	0.03099	0.04355	0.0607	0.04837	0.07902	0.0432	0.06819	0.04595	0.04421	0.06077	0.04583	0.07847	0.06076	0.04234	0.0738	0.0768	0.04981	0.07667	0.03968	0.0452	0.05009	0.04893	0.06329	0.05628	0.05195	0.06183	0.06041	0.05585	0.06017	0.04795	0.05973	0.04642	0.05755	0.04464	0.04447
78.9	0.04731	0.04166	0.04551	0.06051	0.0285	0.02793	0.04272	0.07202	0.05188	0.05112	0.05504	0.0636	0.0492	0.08527	0.03099	0.04164	0.05858	0.04673	0.07702	0.04198	0.06627	0.04373	0.04289	0.05881	0.0446	0.07604	0.05904	0.04155	0.07168	0.07458	0.04835	0.07447	0.03874	0.04377	0.04884	0.04745	0.06209	0.05463	0.05075	0.06033	0.05886	0.05432	0.05861	0.04644	0.05814	0.04515	0.05574	0.04328	0.04299
79	0.04596	0.0409	0.04427	0.05861	0.02734	0.02694	0.04121	0.07014	0.04952	0.04955	0.05342	0.06138	0.04793	0.08024	0.0272	0.03989	0.05656	0.04506	0.07512	0.04083	0.0645	0.04173	0.04155	0.05682	0.04331	0.07357	0.05745	0.0407	0.06944	0.0722	0.04703	0.07229	0.03768	0.04247	0.04739	0.04607	0.06095	0.05292	0.04929	0.05891	0.05743	0.05289	0.05721	0.04506	0.05671	0.04377	0.05397	0.04186	0.04149
79.1	0.04468	0.04021	0.0431	0.0566	0.02626	0.02604	0.04001	0.06907	0.04711	0.04782	0.05184	0.05917	0.04683	0.07797	0.0238	0.03835	0.05462	0.0435	0.07323	0.03964	0.0629	0.03997	0.04031	0.05509	0.04209	0.07112	0.05588	0.03987	0.06732	0.06993	0.04582	0.07029	0.03669	0.04133	0.04599	0.04471	0.05986	0.05143	0.04779	0.05744	0.05628	0.05152	0.05589	0.04377	0.05533	0.0426	0.05213	0.04037	0.03987
79.2	0.04346	0.03947	0.042	0.05464	0.0252	0.02525	0.03888	0.06922	0.04488	0.04601	0.05042	0.05706	0.04626	0.07636	0.02233	0.03705	0.05277	0.04183	0.07138	0.03837	0.06144	0.03843	0.03908	0.05362	0.04088	0.06868	0.0543	0.03908	0.06528	0.06772	0.04472	0.06826	0.0357	0.04029	0.04461	0.04347	0.05876	0.04985	0.04671	0.05609	0.05513	0.05038	0.05462	0.04256	0.054	0.04159	0.05035	0.03913	0.03823
79.3	0.04228	0.03867	0.04097	0.05274	0.02413	0.02452	0.03788	0.06967	0.04295	0.04406	0.0492	0.0552	0.04661	0.07505	0.02125	0.03588	0.05106	0.04032	0.06951	0.03716	0.0602	0.03708	0.03779	0.05204	0.03972	0.06636	0.05267	0.03833	0.06316	0.0655	0.04368	0.06648	0.03479	0.03924	0.0432	0.04233	0.05764	0.04826	0.04601	0.05475	0.05397	0.04919	0.05325	0.04144	0.05271	0.04053	0.0486	0.03792	0.03662
79.4	0.04107	0.0378	0.03987	0.05088	0.02309	0.02379	0.03692	0.06624	0.04113	0.04225	0.04809	0.05343	0.04739	0.07392	0.02042	0.03482	0.04925	0.03907	0.06771	0.03598	0.05914	0.0359	0.03652	0.05071	0.03865	0.06405	0.05098	0.03754	0.06105	0.06331	0.04268	0.06484	0.03384	0.03823	0.04152	0.04125	0.05651	0.04684	0.04528	0.05348	0.05251	0.04784	0.05196	0.04036	0.0514	0.03952	0.04685	0.03678	0.03521
79.5	0.03985	0.03683	0.03883	0.04914	0.02207	0.02306	0.03546	0.05688	0.03921	0.04059	0.04689	0.05176	0.04251	0.07289	0.02014	0.0338	0.04739	0.03811	0.06596	0.03491	0.0581	0.03481	0.03536	0.04951	0.03778	0.06182	0.04942	0.03671	0.05902	0.0613	0.04163	0.06335	0.03291	0.03724	0.03981	0.04009	0.05541	0.04553	0.04448	0.05225	0.05124	0.0467	0.05078	0.03933	0.05007	0.0386	0.04516	0.03572	0.03388
79.6	0.03867	0.03592	0.03788	0.04743	0.02096	0.02225	0.0338	0.05421	0.03723	0.03882	0.04564	0.05023	0.04016	0.07198	0.0207	0.03256	0.04557	0.03729	0.06417	0.0339	0.05704	0.03379	0.03423	0.04835	0.03698	0.05956	0.04797	0.03592	0.05682	0.05944	0.04063	0.06202	0.03205	0.03646	0.0381	0.03881	0.05438	0.04429	0.04341	0.0509	0.05002	0.04564	0.04972	0.03828	0.04879	0.03763	0.04367	0.03457	0.03258
79.7	0.03759	0.03495	0.03697	0.04579	0.01968	0.02129	0.03222	0.05217	0.03545	0.03713	0.04439	0.04885	0.03887	0.06806	0.02118	0.03134	0.04377	0.03653	0.06243	0.03281	0.056	0.03276	0.03319	0.04723	0.0362	0.05738	0.04664	0.03512	0.05451	0.0577	0.03974	0.06071	0.03119	0.03571	0.03675	0.03764	0.05323	0.04303	0.04207	0.04946	0.04896	0.04476	0.04874	0.03726	0.0476	0.03664	0.04244	0.03324	0.03126
79.8	0.03661	0.03392	0.03608	0.04419	0.01833	0.02034	0.03098	0.05072	0.03374	0.03565	0.04325	0.04749	0.0377	0.06494	0.0172	0.03032	0.0419	0.0357	0.06103	0.03178	0.05499	0.03183	0.03219	0.04607	0.03538	0.05534	0.04534	0.0344	0.05267	0.05611	0.03892	0.05947	0.03031	0.03482	0.03502	0.03658	0.05189	0.04164	0.04065	0.04777	0.04802	0.044	0.04783	0.03624	0.0463	0.03571	0.04135	0.03194	0.03
79.9	0.03567	0.03287	0.03524	0.04263	0.0172	0.01945	0.02997	0.05067	0.03214	0.03427	0.04234	0.04613	0.03675	0.06321	0.01597	0.02939	0.04019	0.03509	0.05979	0.03086	0.05399	0.03098	0.03115	0.04496	0.03453	0.05317	0.04402	0.03369	0.05091	0.0545	0.0381	0.05827	0.02951	0.03389	0.03256	0.03562	0.05053	0.04036	0.0394	0.04611	0.0471	0.04316	0.04701	0.03532	0.04508	0.03482	0.04021	0.03087	0.02887
80	0.03477	0.03194	0.03438	0.04113	0.01624	0.01854	0.02888	0.05193	0.03061	0.03302	0.04149	0.04477	0.03658	0.06194	0.01527	0.02842	0.03876	0.03469	0.05874	0.02999	0.05296	0.03021	0.03014	0.04383	0.03363	0.05097	0.0427	0.03286	0.04936	0.05303	0.03737	0.05722	0.0288	0.03297	0.03106	0.03461	0.04927	0.03904	0.03835	0.04455	0.04608	0.04231	0.04619	0.03454	0.04401	0.03386	0.03903	0.02997	0.02784
80.1	0.03404	0.03115	0.03362	0.03968	0.01541	0.01777	0.02812	0.05342	0.02916	0.03187	0.04064	0.04351	0.0372	0.06082	0.01477	0.02729	0.03753	0.03438	0.05773	0.02922	0.05189	0.02936	0.0293	0.04274	0.03275	0.04883	0.0415	0.03197	0.04796	0.05156	0.03668	0.05616	0.02801	0.03209	0.02991	0.03364	0.04799	0.03763	0.03715	0.04301	0.04509	0.04125	0.04535	0.03387	0.04304	0.03283	0.03788	0.02921	0.02677
80.2	0.03333	0.03029	0.0329	0.03822	0.01477	0.01702	0.02715	0.05491	0.02778	0.03085	0.03985	0.04236	0.03788	0.06009	0.01461	0.02616	0.03613	0.03404	0.05672	0.02851	0.05084	0.02843	0.02846	0.04162	0.03189	0.04694	0.04046	0.03114	0.0467	0.05005	0.03592	0.05489	0.02723	0.03124	0.02899	0.03267	0.04686	0.03633	0.03608	0.04165	0.04408	0.03985	0.04448	0.033	0.04211	0.03177	0.03673	0.0285	0.02579
80.3	0.03264	0.02946	0.03223	0.03669	0.01422	0.01629	0.02611	0.04576	0.02651	0.02985	0.03898	0.0411	0.0341	0.06019	0.01516	0.0251	0.03484	0.03359	0.05569	0.0278	0.04985	0.02754	0.02759	0.04041	0.031	0.0451	0.0395	0.03013	0.04554	0.04856	0.03517	0.05341	0.02642	0.0304	0.02828	0.03177	0.0459	0.03513	0.03549	0.04029	0.04289	0.03879	0.04356	0.03219	0.04121	0.03076	0.0355	0.02786	0.02487
80.4	0.03196	0.02869	0.03161	0.03522	0.01377	0.01555	0.02506	0.04371	0.02536	0.02886	0.03814	0.03974	0.03099	0.05718	0.0158	0.0241	0.03354	0.03295	0.05455	0.02709	0.04893	0.02664	0.02659	0.03925	0.03008	0.04331	0.03873	0.02914	0.04445	0.04705	0.03442	0.05177	0.02569	0.02957	0.02783	0.03097	0.04498	0.03391	0.03507	0.03888	0.04162	0.03791	0.04278	0.03149	0.04033	0.02945	0.03438	0.02726	0.02397
80.5	0.03122	0.02791	0.03103	0.03385	0.0134	0.01489	0.0241	0.04216	0.02431	0.02793	0.03724	0.03844	0.02977	0.05469	0.0121	0.02309	0.03214	0.03236	0.0534	0.02643	0.04801	0.02575	0.02565	0.03808	0.02916	0.04169	0.03805	0.02818	0.04335	0.04531	0.03353	0.05008	0.02512	0.0287	0.02757	0.03029	0.04403	0.03257	0.03474	0.0377	0.04039	0.03704	0.04196	0.03076	0.03955	0.02816	0.0333	0.02671	0.0232
80.6	0.03044	0.0272	0.03043	0.03265	0.01306	0.01428	0.02322	0.04102	0.02327	0.02702	0.03632	0.03724	0.02895	0.05343	0.00961	0.02212	0.03061	0.03184	0.05222	0.0257	0.04723	0.02495	0.02475	0.03678	0.02835	0.04033	0.03744	0.02725	0.04219	0.0433	0.03257	0.04822	0.0246	0.02791	0.02725	0.02941	0.0432	0.03136	0.03433	0.03676	0.03936	0.03616	0.04082	0.02997	0.0388	0.02705	0.03224	0.02612	0.02271
80.7	0.02957	0.02648	0.02989	0.03152	0.01274	0.01362	0.02228	0.0408	0.02225	0.02608	0.03551	0.03596	0.02846	0.05238	0.00887	0.02118	0.02933	0.03124	0.051	0.02486	0.04648	0.02415	0.02383	0.03568	0.02758	0.03901	0.03683	0.02646	0.04109	0.04161	0.03156	0.04639	0.02406	0.02723	0.02687	0.02837	0.04239	0.0303	0.03371	0.03598	0.03844	0.03543	0.0397	0.0293	0.0379	0.02608	0.03111	0.02552	0.02239
80.8	0.02864	0.02577	0.02934	0.03032	0.01242	0.01292	0.02138	0.04181	0.02132	0.02508	0.03471	0.03466	0.0284	0.05149	0.00826	0.02022	0.02816	0.03047	0.04995	0.02398	0.04573	0.02336	0.02289	0.03472	0.02675	0.03786	0.03622	0.02559	0.03992	0.04002	0.03047	0.04464	0.02365	0.02654	0.02645	0.02737	0.04162	0.02944	0.03309	0.03532	0.03759	0.03483	0.03859	0.02874	0.03705	0.02529	0.03004	0.0249	0.02207
80.9	0.02766	0.02511	0.02881	0.02927	0.0121	0.01227	0.02055	0.04334	0.02042	0.0241	0.03396	0.03344	0.02896	0.05119	0.00796	0.01885	0.02697	0.02964	0.0489	0.02298	0.04503	0.02259	0.02188	0.03365	0.02591	0.0366	0.03559	0.02451	0.03867	0.03858	0.02931	0.04289	0.02331	0.02586	0.02604	0.02646	0.04073	0.02862	0.03238	0.03482	0.03669	0.03421	0.03761	0.0282	0.03623	0.02465	0.0291	0.0243	0.02165
81	0.0267	0.02452	0.02827	0.02826	0.01181	0.01164	0.01983	0.04424	0.01956	0.02315	0.03323	0.03222	0.02955	0.05148	0.00848	0.01749	0.02576	0.02869	0.0479	0.02182	0.04441	0.02173	0.02084	0.0325	0.02495	0.03531	0.03488	0.02307	0.03749	0.03724	0.02806	0.04125	0.02294	0.02515	0.02557	0.0255	0.03975	0.02772	0.03152	0.03436	0.03537	0.03362	0.03656	0.0276	0.03539	0.02408	0.02825	0.02372	0.02121
81.1	0.0258	0.02397	0.02771	0.0274	0.01152	0.01103	0.01903	0.03953	0.01879	0.02228	0.0325	0.03108	0.02559	0.05097	0.00962	0.01629	0.0246	0.02768	0.04691	0.02055	0.04381	0.02096	0.01977	0.03147	0.02391	0.03399	0.03411	0.02199	0.03639	0.03592	0.02688	0.03984	0.02255	0.02444	0.02494	0.02456	0.03878	0.02664	0.03075	0.03387	0.03392	0.03278	0.03542	0.027	0.03448	0.02353	0.02745	0.02314	0.02072
81.2	0.02497	0.02341	0.02718	0.02658	0.01132	0.01038	0.01798	0.03341	0.01808	0.0215	0.03173	0.03004	0.02261	0.04701	0.00559	0.01519	0.02336	0.02661	0.04593	0.01935	0.04313	0.02042	0.0187	0.0306	0.02293	0.0326	0.03318	0.02105	0.03552	0.03475	0.02591	0.03863	0.02208	0.02378	0.0242	0.02352	0.03794	0.02569	0.03022	0.03334	0.03256	0.03185	0.03428	0.02639	0.03363	0.02291	0.02669	0.02255	0.02017
81.3	0.02417	0.02282	0.02667	0.02575	0.01117	0.00971	0.01676	0.03138	0.01732	0.02068	0.03104	0.02906	0.02145	0.04554	0.00381	0.01418	0.02209	0.02543	0.04474	0.01828	0.04256	0.01994	0.01761	0.02969	0.02203	0.03126	0.03231	0.02021	0.03477	0.03375	0.02509	0.03748	0.02161	0.02314	0.02324	0.02264	0.03712	0.02483	0.02975	0.03282	0.03135	0.03114	0.03324	0.02582	0.03274	0.02225	0.02592	0.02198	0.01965
81.4	0.02332	0.02223	0.02617	0.02477	0.01116	0.00904	0.01538	0.03003	0.01658	0.01976	0.03038	0.0281	0.0207	0.04462	0.00313	0.01336	0.02072	0.02429	0.04348	0.01721	0.042	0.01951	0.01671	0.02882	0.02118	0.02979	0.03144	0.01943	0.03401	0.03295	0.02434	0.03622	0.02111	0.02244	0.02219	0.02179	0.0362	0.02385	0.02929	0.03216	0.03034	0.03061	0.03219	0.02518	0.03183	0.02159	0.0251	0.02146	0.01908
81.5	0.02248	0.02167	0.02569	0.02378	0.0114	0.00844	0.01404	0.02933	0.01572	0.01881	0.02974	0.02719	0.02093	0.04399	0.00258	0.01259	0.01926	0.02299	0.04226	0.0161	0.04146	0.01898	0.016	0.02781	0.02042	0.0284	0.03056	0.01868	0.03333	0.03227	0.02352	0.03498	0.0206	0.02172	0.02109	0.02102	0.03526	0.02276	0.02871	0.03139	0.02961	0.03009	0.03131	0.02447	0.03089	0.02087	0.0243	0.02099	0.01843
81.6	0.0217	0.0211	0.02519	0.02275	0.01217	0.00791	0.01274	0.02993	0.01463	0.01792	0.02913	0.0263	0.0215	0.04412	0.00224	0.01179	0.01782	0.02144	0.04113	0.01506	0.04089	0.01851	0.01536	0.02681	0.01992	0.02704	0.02969	0.01792	0.03274	0.03161	0.02253	0.03366	0.02024	0.02104	0.02017	0.0204	0.03443	0.02177	0.02817	0.03067	0.02898	0.02951	0.03052	0.0238	0.0301	0.02025	0.0235	0.02054	0.01779
81.7	0.02099	0.02049	0.02471	0.02168	0.01325	0.00737	0.01138	0.03126	0.01358	0.01706	0.02853	0.02548	0.02247	0.04156	0.00256	0.01089	0.01644	0.01991	0.03997	0.01407	0.04031	0.01806	0.01478	0.0259	0.01946	0.02574	0.02879	0.01724	0.03215	0.03093	0.02148	0.03202	0.01989	0.02042	0.0192	0.01978	0.03386	0.02093	0.02771	0.03008	0.02842	0.02892	0.02968	0.0232	0.02933	0.01963	0.02268	0.02011	0.01712
81.8	0.02036	0.01982	0.02427	0.02066	0.01447	0.00683	0.00992	0.03165	0.01261	0.01608	0.02795	0.02477	0.02176	0.03861	0.00359	0.00993	0.01509	0.01852	0.03881	0.01324	0.03965	0.0176	0.01427	0.02507	0.01908	0.02449	0.02785	0.0166	0.03167	0.03022	0.02043	0.03021	0.0196	0.01982	0.01818	0.01919	0.03342	0.02011	0.02713	0.02934	0.02805	0.02844	0.02907	0.02262	0.02849	0.01901	0.0218	0.01969	0.0165
81.9	0.0198	0.0191	0.02382	0.01967	0.01567	0.00623	0.00849	0.02368	0.01176	0.01512	0.0274	0.02406	0.01805	0.03745	0.00134	0.00899	0.01376	0.01724	0.03782	0.01247	0.03888	0.01716	0.01373	0.02433	0.01869	0.02324	0.02684	0.01608	0.03124	0.02945	0.01924	0.02853	0.01928	0.01922	0.01732	0.01868	0.03297	0.01931	0.0265	0.02821	0.02761	0.02794	0.02846	0.02205	0.02758	0.01842	0.02095	0.01928	0.01603
82	0.01928	0.0184	0.02335	0.01877	0.01683	0.00566	0.00729	0.02199	0.01098	0.01426	0.02687	0.02331	0.01681	0.03674	-0.00237	0.0081	0.01232	0.01605	0.03703	0.01184	0.03787	0.01664	0.01315	0.02347	0.01824	0.02207	0.02609	0.0156	0.03079	0.02871	0.01818	0.02721	0.01875	0.0186	0.01651	0.01822	0.0324	0.01852	0.02601	0.02688	0.02695	0.02753	0.0278	0.02152	0.02662	0.01783	0.02015	0.01885	0.01572
82.1	0.01875	0.01773	0.0229	0.01792	0.01805	0.00509	0.00619	0.0208	0.01027	0.01339	0.02628	0.02259	0.01604	0.03744	-0.00275	0.00737	0.01066	0.01506	0.03637	0.01136	0.03691	0.01614	0.01263	0.02242	0.01762	0.02095	0.0255	0.01515	0.03041	0.02806	0.01725	0.02601	0.01806	0.01804	0.01575	0.01769	0.03175	0.01772	0.02555	0.02584	0.02624	0.0271	0.02699	0.02098	0.02554	0.01729	0.01934	0.0184	0.01546
82.2	0.01819	0.017	0.02243	0.01713	0.019	0.00456	0.00537	0.02015	0.0096	0.01255	0.02573	0.02188	0.0158	0.0388	-0.00268	0.00672	0.00902	0.01423	0.03576	0.01081	0.0361	0.01554	0.01212	0.02125	0.01688	0.01963	0.02489	0.01469	0.03007	0.02726	0.01648	0.02483	0.01736	0.01743	0.01491	0.01712	0.03106	0.01726	0.02465	0.02507	0.02551	0.02656	0.02589	0.02038	0.02453	0.01679	0.01843	0.01789	0.01503
82.3	0.01761	0.01625	0.02193	0.01637	0.01964	0.00406	0.00473	0.02073	0.00901	0.01179	0.02519	0.02117	0.01616	0.03876	-0.00198	0.00606	0.0075	0.0133	0.03532	0.01026	0.03529	0.01484	0.01161	0.02	0.01589	0.01828	0.02433	0.01423	0.02977	0.02646	0.0158	0.02379	0.01663	0.01679	0.01404	0.01643	0.03035	0.01684	0.02369	0.02452	0.0248	0.02578	0.02463	0.01975	0.02363	0.0163	0.01768	0.01732	0.01452
82.4	0.01702	0.0155	0.0214	0.0157	0.02006	0.00361	0.00426	0.02274	0.00852	0.01111	0.02471	0.02038	0.01646	0.03566	-0.000264	0.00544	0.00619	0.01236	0.03489	0.00962	0.0346	0.01412	0.01109	0.01871	0.01486	0.01697	0.02383	0.01344	0.0295	0.02573	0.01511	0.02285	0.01602	0.01616	0.01338	0.01578	0.02965	0.0164	0.02306	0.02406	0.02411	0.02518	0.02353	0.01919	0.02275	0.01576	0.017	0.01674	0.01402
82.5	0.01644	0.01469	0.02089	0.0151	0.02028	0.0031	0.00385	0.02036	0.00805	0.01044	0.02427	0.01958	0.01662	0.03406	0.00222	0.00468	0.00516	0.01156	0.03427	0.00894	0.03396	0.01336	0.01064	0.01737	0.01395	0.01572	0.0234	0.0127	0.0292	0.02507	0.01447	0.02196	0.01545	0.01555	0.0128	0.01503	0.02907	0.01578	0.02252	0.02341	0.02334	0.02451	0.02263	0.01858	0.02191	0.01524	0.01637	0.01616	0.01345
82.6	0.01582	0.01398	0.02035	0.01451	0.02049	0.00252	0.00339	0.01535	0.00752	0.0097	0.02373	0.01875	0.01685	0.03324	0.00134	0.00376	0.0042	0.01103	0.03351	0.00808	0.03331	0.01246	0.0102	0.01607	0.01319	0.0142	0.02301	0.01207	0.0291	0.02459	0.01387	0.02104	0.01478	0.01485	0.01223	0.0142	0.02859	0.01497	0.02163	0.02279	0.02249	0.0237	0.02183	0.01783	0.02105	0.01473	0.01576	0.01559	0.01287
82.7	0.0152	0.0133	0.01979	0.01395	0.02084	0.00196	0.00282	0.01406	0.00703	0.00896	0.02311	0.01798	0.01697	0.03268	-0.00135	0.00286	0.00323	0.0105	0.03279	0.00721	0.03261	0.01143	0.00975	0.01479	0.0125	0.01287	0.02256	0.01153	0.0291	0.02425	0.0133	0.02013	0.01408	0.01416	0.01166	0.01334	0.02811	0.0144	0.0206	0.02223	0.02177	0.02289	0.02107	0.01699	0.02027	0.01418	0.01514	0.015	0.01215
82.8	0.01455	0.01269	0.01917	0.01349	0.02116	0.00141	0.00217	0.01318	0.00662	0.00812	0.02253	0.01724	0.01334	0.03275	-0.00129	0.002	0.00238	0.00991	0.03208	0.00638	0.03192	0.01058	0.00933	0.01356	0.01192	0.01173	0.02202	0.01093	0.02915	0.02406	0.01288	0.01933	0.01342	0.01347	0.01106	0.01244	0.02754	0.0138	0.0196	0.02165	0.0211	0.02202	0.02018	0.01618	0.01949	0.01356	0.0144	0.01441	0.01127
82.9	0.01381	0.01212	0.01852	0.01307	-0.0067	0.000889	0.00152	0.01312	0.00617	0.00713	0.02189	0.0165	0.01099	0.03414	-0.000966	0.00117	0.00169	0.0091	0.03124	0.00554	0.03127	0.00976	0.00897	0.01244	0.01139	0.01056	0.02148	0.01036	0.02918	0.02368	0.01249	0.01848	0.01282	0.01284	0.01042	0.01144	0.02674	0.01332	0.01866	0.02107	0.02038	0.02111	0.01919	0.01535	0.01871	0.01296	0.0137	0.01379	0.01024
83	0.01311	0.01154	0.01783	0.01272	-0.03608	0.000377	0.00085	0.01445	0.00568	0.00612	0.02122	0.01579	0.01007	0.03175	-0.000144	0.000766	0.00135	0.0082	0.03035	0.00469	0.03062	0.00897	0.00867	0.01135	0.01082	0.00935	0.02094	0.00987	0.02922	0.02315	0.01214	0.01756	0.01213	0.01226	0.00969	0.0105	0.02595	0.01301	0.01793	0.02053	0.01967	0.02022	0.01807	0.01455	0.01802	0.0124	0.01295	0.01317	0.00936
83.1	0.01247	0.01096	0.01708	0.01252	-0.04135	-8.01e-05	0.000246	0.01691	0.00514	0.0052	0.02051	0.01502	0.00967	0.03024	0.00152	0.000618	0.00114	0.00731	0.02957	0.00395	0.02998	0.00815	0.00837	0.01029	0.01017	0.00828	0.02044	0.00943	0.0293	0.02276	0.01175	0.01662	0.01138	0.0117	0.00893	0.00966	0.02506	0.0125	0.01733	0.02006	0.01888	0.0193	0.01708	0.01371	0.01728	0.01178	0.01216	0.01255	0.00854
83.2	0.0119	0.01042	0.01626	0.01227	-0.04459	1.64e-05	-0.000204	0.01926	0.00452	0.00427	0.01985	0.01417	0.01069	0.02959	0.00389	0.000992	0.00102	0.00658	0.02883	0.00329	0.0293	0.00731	0.00808	0.00926	0.00946	0.00749	0.01988	0.00882	0.02922	0.02253	0.0113	0.01562	0.01061	0.01118	0.00816	0.00896	0.02402	0.01181	0.01672	0.01969	0.01792	0.01854	0.0164	0.01288	0.01639	0.01111	0.01132	0.01191	0.00781
83.3	0.01141	0.0099	0.01541	0.01195	-0.04287	9.66e-05	-0.00046	0.01282	0.00387	0.00334	0.01918	0.01325	0.01204	0.02951	0.0047	0.0015	0.000872	0.00605	0.02811	0.00262	0.02849	0.00647	0.00774	0.00826	0.00863	0.0068	0.01937	0.00803	0.02913	0.02238	0.01087	0.01465	0.00989	0.01065	0.00741	0.00821	0.02294	0.01097	0.01596	0.01905	0.01701	0.01796	0.01586	0.01212	0.01544	0.01043	0.01054	0.01125	0.00692
83.4	0.0109	0.00938	0.01445	0.01151	-0.03725	0.00012	-0.0012	0.01152	0.00309	0.00238	0.0185	0.01228	0.00772	0.03025	0.00131	0.00197	0.000762	0.00555	0.02741	0.00205	0.02765	0.00569	0.00729	0.00734	0.00773	0.00619	0.01887	0.00708	0.02902	0.02221	0.01037	0.01366	0.00927	0.01007	0.00662	0.00738	0.02166	0.01005	0.01513	0.0182	0.01616	0.01748	0.01512	0.0114	0.0144	0.00974	0.00983	0.01055	0.00594
83.5	0.01036	0.00886	0.01347	0.0111	-0.02992	0.000123	-0.00189	0.01053	0.00236	0.00178	0.01776	0.01137	0.0057	0.03098	0.00143	0.00233	0.000746	0.00509	0.02666	0.00152	0.02675	0.00502	0.00691	0.00646	0.00677	0.00559	0.01835	0.00634	0.02885	0.02201	0.00975	0.01262	0.0086	0.00946	0.0058	0.00661	0.02045	0.00891	0.01439	0.0174	0.01542	0.01686	0.01408	0.01061	0.01319	0.00915	0.00914	0.00985	0.00493
83.6	0.00978	0.00832	0.01252	0.01073	-0.02236	0.000105	-0.00236	0.00982	0.00161	0.00133	0.01707	0.01052	0.00457	0.02643	0.00204	0.00259	0.000643	0.00457	0.02593	0.00101	0.02579	0.00434	0.00652	0.0056	0.0059	0.00501	0.01773	0.00578	0.028	0.02178	0.0091	0.01152	0.00793	0.00879	0.00496	0.00591	0.01929	0.00791	0.01369	0.01661	0.01459	0.01619	0.01309	0.00989	0.01214	0.00859	0.00849	0.00911	0.00406
83.7	0.00917	0.0078	0.0116	0.01019	-0.01542	0.000138	-0.0027	0.01005	0.000817	0.000919	0.01627	0.00974	0.00381	0.02503	0.00298	0.00267	0.000406	0.00401	0.02527	0.000504	0.02486	0.00371	0.00608	0.00473	0.0051	0.00452	0.01708	0.0051	0.0141	0.0215	0.00841	0.01038	0.00738	0.00818	0.00419	0.0051	0.01812	0.0073	0.01281	0.01553	0.01351	0.01544	0.01198	0.00914	0.01118	0.00807	0.00789	0.00827	0.00325
83.8	0.00854	0.0073	0.01062	0.00948	-0.0095	0.000192	-0.00302	0.0113	9.9e-05	0.000515	0.01506	0.00899	0.00399	0.02401	0.00493	0.00282	0.000147	0.00361	0.02458	3.65e-06	0.02391	0.00298	0.00556	0.00385	0.00442	0.00406	0.01636	0.00444	0.01185	0.0211	0.00767	0.00924	0.00686	0.00765	0.00347	0.00429	0.01707	0.00667	0.0118	0.01412	0.01249	0.01447	0.01097	0.00844	0.01018	0.00751	0.00732	0.0074	0.00237
83.9	0.0079	0.00676	0.0095	0.00865	-0.00447	0.000234	-0.00334	0.01138	-0.000419	8.89e-05	0.01393	0.00824	0.00575	0.02336	0.00788	0.00317	-0.000148	0.00312	0.02392	-0.000196	0.02294	0.00225	0.00491	0.00303	0.00373	0.00356	0.01557	0.00392	0.01013	0.02059	0.00695	0.00819	0.00631	0.00715	0.00292	0.00352	0.01625	0.00594	0.0108	0.01257	0.01161	0.01344	0.01005	0.00786	0.00917	0.00692	0.00675	0.00653	0.00156
84	0.00721	0.00618	0.00845	0.00768	-0.000158	0.000288	-0.00298	0.00595	-0.000497	-2.01e-05	0.01295	0.00735	0.00802	0.02319	0.00812	0.00362	-0.000339	0.00232	0.02326	-0.000238	0.02197	0.00167	0.00419	0.0023	0.00314	0.00291	0.01475	0.00339	0.00896	0.01979	0.00613	0.007	0.00578	0.00663	0.00222	0.0028	0.01556	0.0052	0.00982	0.01103	0.01062	0.01248	0.00929	0.00725	0.00814	0.00624	0.00613	0.00561	0.000774
84.1	0.00648	0.00563	0.00749	0.00664	0.00376	0.000367	-0.00272	0.0037	-0.000485	-5.79e-05	0.012	0.00647	0.00453	0.02316	0.00744	0.00416	-0.000484	0.00175	0.02254	-0.000277	0.02099	0.00134	0.00355	0.00169	0.00256	0.00219	0.01387	0.00283	0.00877	0.01901	0.00515	0.00589	0.00526	0.00599	0.00136	0.00185	0.01492	0.00454	0.00874	0.0096	0.00951	0.01142	0.0084	0.00646	0.00718	0.00542	0.00553	0.0048	0.000452
84.2	0.00569	0.00504	0.00659	0.00563	0.00734	0.000407	-0.00254	0.00237	-0.00045	1.47e-05	0.01113	0.00561	0.00292	0.02216	0.00849	0.00486	-0.000683	0.00129	0.02171	-0.000399	0.02001	0.000786	0.00299	0.00127	0.002	0.00166	0.01287	0.00222	0.00982	0.01866	0.00422	0.00486	0.00484	0.00518	0.000641	0.000714	0.01431	0.00386	0.00757	0.00815	0.0084	0.01043	0.00739	0.00561	0.00626	0.00468	0.00492	0.00404	0.000136
84.3	0.00489	0.00443	0.00577	0.00478	0.01028	0.000374	-0.00221	0.00162	-0.000421	0.000112	0.01035	0.00476	0.00211	0.01811	0.01003	0.00563	-0.000795	0.00102	0.02091	-0.000535	0.01898	0.000104	0.00256	0.000556	0.00144	0.00129	0.0118	0.00156	0.01052	0.01843	0.00326	0.00389	0.0044	0.00428	-0.000177	-0.000166	0.01372	0.00312	0.00625	0.00668	0.00725	0.00939	0.00646	0.00483	0.0053	0.00392	0.00431	0.00336	-0.000207
84.4	0.00411	0.00381	0.00492	0.00396	0.01317	0.000257	-0.00167	0.00251	-0.000503	0.000177	0.00968	0.00388	0.00159	0.01683	0.01194	0.00632	-0.000957	0.000731	0.02005	-0.000726	0.01803	-0.000354	0.0021	0.000336	0.000856	0.00107	0.01074	0.000904	0.00249	0.01828	0.00227	0.00298	0.00369	0.00334	-0.000905	-0.000601	0.01306	0.00243	0.00507	0.00529	0.00625	0.00827	0.00569	0.00418	0.00428	0.00312	0.00371	0.00273	-0.000438
84.5	0.0033	0.00307	0.0041	0.00343	0.01569	0.000123	-0.00137	0.00431	-0.0007	0.000265	0.00901	0.00299	0.00148	0.01611	-0.00353	0.00694	-0.00137	0.000484	0.01922	-0.000948	0.01714	-0.000541	0.00224	0.000348	0.000353	0.000889	0.00975	0.000317	-0.00333	0.01821	0.00126	0.00218	0.00268	0.00243	-0.0012	-0.000889	0.0122	0.0015	0.00389	0.00397	0.0054	0.00702	0.00508	0.00349	0.00329	0.00233	0.00309	0.00215	-0.000586
84.6	0.00249	0.00232	0.00328	0.00304	0.01785	-4.28e-05	-0.00151	0.00588	-0.00109	0.000337	0.0083	0.00215	0.00237	0.01614	-0.00521	0.00761	-0.00168	0.000295	0.01843	-0.0011	0.01644	-0.000611	0.00228	0.00056	-0.000126	0.000884	0.00881	9.2e-05	-0.00462	0.01833	0.000596	0.00147	0.00189	0.00155	-0.00149	-0.00117	0.0112	0.000602	0.00288	0.0027	0.00472	0.00577	0.0045	0.00272	0.00238	0.0016	0.00253	0.00161	-0.000581
84.7	0.00169	0.00161	0.00243	0.0025	0.0197	-0.00019	-0.00164	-0.00106	-0.0014	0.000377	0.00756	0.00138	0.00398	0.01676	-0.00742	0.0083	-0.00189	0.000149	0.01754	-0.00118	0.01584	-0.000672	0.00207	0.000808	-0.000295	0.000943	0.00784	1.14e-05	-0.00492	0.01865	0.000136	0.000874	0.00113	0.000619	-0.00168	-0.00155	0.01014	-5.86e-05	0.00192	0.00163	0.00404	0.00471	0.00376	0.00195	0.00145	0.000922	0.00193	0.00109	-0.000486
84.8	0.000827	0.000917	0.00153	0.00183	0.02096	-0.00041	-0.00181	-0.00299	-0.0016	0.000371	0.00679	0.000661	0.00131	0.01599	-0.01166	0.00898	-0.00206	0.000121	0.01656	-0.00138	0.01526	-0.000654	0.00164	0.00092	-0.000228	0.000883	0.0067	-0.000268	-0.00326	0.01913	-0.000175	0.000256	0.000359	-0.000226	-0.00184	-0.00197	0.00906	-0.000483	0.00129	0.000649	0.00321	0.00373	0.00304	0.000897	0.000488	0.000203	0.00126	0.000586	-0.000246
84.9	4.16e-05	0.000249	0.000655	0.00119	0.02212	-0.000738	-0.00203	-0.00353	-0.00172	0.000308	0.00602	0.000176	-0.00165	0.01289	-0.00985	0.00978	-0.00212	0.000208	0.01555	-0.00171	0.01462	-0.000765	0.00108	0.000965	-0.000191	0.000696	0.00548	-0.000609	-0.000357	0.01977	-0.00037	-0.000335	-0.000337	-0.00076	-0.00203	-0.00241	0.00807	-0.00098	0.000815	-0.000227	0.00233	0.0028	0.00234	-8.18e-05	-0.000448	-0.000367	0.000632	0.000213	-7.77e-05
85	-0.000296	9.31e-05	7.18e-05	0.000834	0.02304	-0.0012	-0.00257	-0.00335	-0.00183	0.000323	0.00523	-9.88e-05	-0.00251	0.0112	-0.00648	0.01069	-0.00205	0.000503	0.01451	-0.00199	0.01391	-0.000894	0.000682	0.00102	-0.000115	0.000332	0.00433	-0.000955	0.00314	0.02043	-0.000407	-0.000575	-0.000819	-0.000965	-0.00227	-0.00282	0.00704	-0.00143	0.000896	-0.000602	0.00154	0.00202	0.00155	-0.000478	-0.00099	-0.000586	0.000239	0.000255	0.000123
85.1	-0.000489	6.34e-05	-0.000336	0.000492	0.0239	-0.00161	-0.00303	-0.00144	-0.00205	0.00036	0.00458	-0.000346	-0.00296	0.01012	-0.00245	0.01157	-0.00189	0.000756	0.01346	-0.00215	0.01298	-0.00108	0.000187	0.000989	-4.24e-06	-0.000211	0.00323	-0.00122	0.00652	0.01934	-0.000237	-0.000656	-0.00128	-0.00105	-0.00247	-0.00319	0.00602	-0.00164	0.000942	-0.000962	0.000703	0.0011	0.000729	-0.00119	-0.00125	-0.000733	-0.000111	0.000356	0.000221
85.2	-0.000647	4.28e-05	-0.000715	0.000206	0.02471	-0.00191	-0.00343	0.00163	-0.0023	0.000596	0.00404	-0.000469	-0.00308	0.00892	0.00216	0.01244	-0.00169	0.000888	0.01238	-0.00211	0.01201	-0.00127	-0.000466	0.000872	6.23e-05	-0.000832	0.00212	-0.0015	0.00617	0.00408	-0.000114	-0.000605	-0.00153	-0.00108	-0.0025	-0.00358	0.00505	-0.00194	0.000823	-0.00128	-0.000199	7.9e-05	-5.86e-05	-0.00178	-0.00157	-0.00081	-0.000331	0.000426	5.62e-05
85.3	-0.000942	-1.36e-05	-0.00103	8.46e-06	0.01086	-0.00215	-0.00379	0.00399	-0.00255	0.00122	0.00361	-0.000663	-0.00189	0.0077	-0.00174	0.01319	-0.00152	0.000774	0.01118	-0.00207	0.01105	-0.00147	-0.00118	0.000665	8.15e-05	-0.00142	0.00104	-0.00168	-0.00253	0.00225	-5.06e-05	-0.000551	-0.00172	-0.00114	-0.00242	-0.00392	0.00406	-0.00222	0.000492	-0.00148	-0.000735	-0.00062	-0.000442	-0.00203	-0.00186	-0.000954	-0.000576	0.000497	-0.000152
85.4	-0.00124	-0.000198	-0.00129	-5.89e-05	-0.03053	-0.00236	-0.00431	-0.00375	-0.00275	0.00207	0.0032	-0.000984	0.000829	0.00772	-0.01082	0.01382	-0.00141	0.000101	0.00991	-0.00221	0.01006	-0.00166	-0.00196	0.000388	2.92e-06	-0.00204	0.000176	-0.00171	-0.00315	0.00115	-1.92e-05	-0.000436	-0.00189	-0.00129	-0.00237	-0.0043	0.00314	-0.0023	-0.00047	-0.00159	-0.00125	-0.00124	-0.000761	-0.00213	-0.00217	-0.00117	-0.000854	0.000542	-0.000589
85.5	-0.00145	-0.000444	-0.00149	-0.000159	-0.03743	-0.00262	-0.00474	-0.00483	-0.00291	0.00333	0.00282	-0.00133	0.00296	0.00494	-0.01426	0.01448	-0.00131	-0.00046	0.00853	-0.00257	0.00908	-0.00185	-0.00266	7.99e-05	-0.000289	-0.00261	-0.000381	-0.00165	-0.00334	0.000613	-3.32e-05	-0.0004	-0.0021	-0.0015	-0.00244	-0.00462	0.00223	-0.00254	-0.00147	-0.00173	-0.00188	-0.00182	-0.00109	-0.00223	-0.00243	-0.00145	-0.00114	0.000556	-0.00096
85.6	-0.00167	-0.000718	-0.00172	-0.000487	-0.04192	-0.00278	-0.00505	-0.00536	-0.00306	0.00503	0.00247	-0.00147	-0.00267	0.000843	-0.01425	0.0151	-0.00123	-0.000959	0.00724	-0.00277	0.00807	-0.00199	-0.00323	-0.000177	-0.000655	-0.00309	-0.000554	-0.00151	-0.00253	0.00132	-2.94e-05	-0.000436	-0.00233	-0.00169	-0.00274	-0.00484	0.00137	-0.00297	-0.00227	-0.00177	-0.00257	-0.00237	-0.00138	-0.00225	-0.00262	-0.0017	-0.00141	0.000516	-0.00123
85.7	-0.0019	-0.000974	-0.00204	-0.000823	-0.04226	-0.0028	-0.005	-0.00496	-0.00322	0.00694	0.00207	-0.00139	-0.00368	-0.00036	-0.01202	0.01133	-0.00115	-0.00139	0.00608	-0.003	0.00719	-0.00218	-0.00366	-0.000339	-0.00099	-0.00347	-0.000622	-0.00135	-0.000122	0.00317	-2.85e-05	-0.000548	-0.00248	-0.00182	-0.00281	-0.00506	0.000608	-0.00361	-0.00292	-0.00179	-0.00318	-0.00269	-0.00175	-0.00223	-0.00274	-0.00179	-0.00166	0.000539	-0.00156
85.8	-0.00214	-0.00122	-0.00226	-0.00102	-0.03727	-0.00274	-0.00457	-0.00272	-0.00334	0.00906	0.00162	-0.00129	-0.00414	-0.000937	-0.00769	0.00131	-0.00102	-0.00177	0.00489	-0.00308	0.00633	-0.00234	-0.00396	-0.000389	-0.00122	-0.00372	-0.000509	-0.00114	0.00281	0.00534	1e-05	-0.000652	-0.00254	-0.00195	-0.00291	-0.00519	-6.88e-06	-0.004	-0.00348	-0.00186	-0.00353	-0.00286	-0.00207	-0.0023	-0.0029	-0.00195	-0.00185	0.000805	-0.0018
85.9	-0.00233	-0.00149	-0.00243	-0.00109	-0.03047	-0.00265	-0.00416	0.00059	-0.0034	0.01126	0.00114	-0.0012	-0.00416	-0.000336	-0.00156	-5.55e-05	-0.000916	-0.00206	0.00373	-0.00307	0.00525	-0.00237	-0.00415	-0.000356	-0.00137	-0.00383	-0.000307	-0.000853	0.00574	-0.0074	2.17e-05	-0.000835	-0.00244	-0.00208	-0.00307	-0.00511	-0.000382	-0.00429	-0.00386	-0.00195	-0.00366	-0.00304	-0.0022	-0.00237	-0.00308	-0.00217	-0.0021	0.00137	-0.00189
86	-0.00254	-0.00177	-0.00258	-0.00122	-0.0234	-0.00257	-0.0039	0.00394	-0.00344	0.0133	0.000664	-0.00108	-0.00323	0.00141	0.00274	-0.000831	-0.000812	-0.00228	0.00262	-0.00306	0.00425	-0.00227	-0.00423	-0.00038	-0.00138	-0.00381	-0.000108	-0.000463	-0.000456	-0.01723	8.35e-05	-0.001	-0.0023	-0.0022	-0.0031	-0.00497	-0.000549	-0.00443	-0.00415	-0.00213	-0.00363	-0.00313	-0.00265	-0.00238	-0.00326	-0.00253	-0.00227	0.00222	-0.00187
86.1	-0.00273	-0.00203	-0.00271	-0.0014	-0.0165	-0.00247	-0.00397	-0.000144	-0.00355	0.01517	0.000245	-0.000986	-0.00106	0.0013	0.00112	-0.000912	-0.000694	-0.00238	0.00155	-0.00301	0.00337	-0.0022	-0.00421	-0.000495	-0.00136	-0.00379	6.88e-05	-5.83e-05	-0.00502	-0.01948	0.000231	-0.00114	-0.00213	-0.0023	-0.00297	-0.00462	-0.000683	-0.00452	-0.00471	-0.00223	-0.00356	-0.00317	-0.00299	-0.00255	-0.00343	-0.00325	-0.00236	0.00331	-0.00169
86.2	-0.00278	-0.00225	-0.0028	-0.00155	-0.01013	-0.00232	-0.00433	-0.00409	-0.00364	0.01665	-0.000179	-0.000929	-0.00178	-0.000633	-0.00691	0.000298	-0.000667	-0.00249	0.000675	-0.0029	0.00247	-0.00214	-0.00416	-0.000496	-0.00135	-0.00375	0.000225	0.000292	-0.00586	-0.01941	0.000329	-0.0013	-0.00198	-0.0024	-0.00291	-0.00428	-0.000724	-0.00455	-0.00554	-0.00215	-0.00356	-0.00325	-0.00323	-0.00282	-0.00361	-0.00382	-0.00244	0.00475	-0.00138
86.3	-0.00274	-0.00244	-0.00285	-0.00147	-0.00428	-0.00217	-0.00449	-0.00477	-0.00369	0.01773	-0.000549	-0.000954	-0.00501	-0.000893	-0.00719	0.0024	-0.000749	-0.00252	0.000103	-0.00274	0.00157	-0.00205	-0.00416	-0.000381	-0.00124	-0.00374	0.000308	0.00052	-0.00593	-0.01652	0.000371	-0.0015	-0.00175	-0.00251	-0.00302	-0.00395	-0.000667	-0.00459	-0.0061	-0.00194	-0.00343	-0.00305	-0.00337	-0.00304	-0.00375	-0.00421	-0.00247	0.00609	-0.00106
86.4	-0.0026	-0.00262	-0.00282	-0.00126	0.00108	-0.00202	-0.0047	-0.00469	-0.00366	0.00637	-0.000513	-0.001	-0.00585	-0.000987	-0.00684	-0.00223	-0.000857	-0.0025	-0.000506	-0.00261	0.000743	-0.00198	-0.00419	-0.000371	-0.00115	-0.00375	0.000319	0.000684	-0.00434	-0.01191	0.000362	-0.00166	-0.00152	-0.00258	-0.00308	-0.00362	-0.000903	-0.00462	-0.00647	-0.00175	-0.00322	-0.00283	-0.00317	-0.00323	-0.00397	-0.0045	-0.00245	0.00731	-0.000855
86.5	-0.00244	-0.00275	-0.00275	-0.00121	0.0055	-0.00186	-0.0048	-0.00294	-0.00364	0.00192	-0.000438	-0.00108	-0.00616	-0.00093	-0.00526	-0.00556	-0.000993	-0.00253	-0.00109	-0.0025	0.000122	-0.0019	-0.00423	-0.000312	-0.00104	-0.00385	0.000227	0.000767	-0.00147	-0.00658	0.000289	-0.00181	-0.00136	-0.00261	-0.00306	-0.00328	-0.00102	-0.00465	-0.0066	-0.00164	-0.00293	-0.00249	-0.00271	-0.00333	-0.00418	-0.00467	-0.00241	0.00828	-0.000841
86.6	-0.00228	-0.00282	-0.00271	-0.00124	0.00928	-0.0017	-0.00471	0.000222	-0.00368	0.000484	-0.000439	-0.0012	-0.00589	-0.00047	-0.00147	-0.00597	-0.00108	-0.00261	-0.00156	-0.00237	-0.000317	-0.0019	-0.00408	-0.000138	-0.000884	-0.00397	0.00012	0.000732	0.0019	-0.00144	9.6e-05	-0.00191	-0.00127	-0.00263	-0.0029	-0.003	-0.00101	-0.00455	-0.00657	-0.00145	-0.00286	-0.00204	-0.00217	-0.00329	-0.00429	-0.00486	-0.00238	0.00902	-0.000893
86.7	-0.00215	-0.00282	-0.00275	-0.00133	0.01263	-0.0016	-0.00489	0.00401	-0.00364	-0.000191	-0.000506	-0.00136	-0.00507	-0.000173	0.00318	-0.00573	-0.00109	-0.00265	-0.00193	-0.0023	-0.000587	-0.0019	-0.00377	0.000141	-0.000783	-0.00394	-9.69e-05	0.000777	0.00502	0.00275	-0.000145	-0.00182	-0.00117	-0.0027	-0.00273	-0.00272	-0.000928	-0.00447	-0.00659	-0.00128	-0.0029	-0.00174	-0.00161	-0.0032	-0.00431	-0.00497	-0.00231	0.00984	-0.000864
86.8	-0.00203	-0.00274	-0.0028	-0.00144	0.01592	-0.00154	-0.00505	0.00123	-0.00362	0.000577	-0.000571	-0.00151	-0.00282	-0.00339	-0.00328	-0.00424	-0.000968	-0.0027	-0.00221	-0.00231	-0.000774	-0.00192	-0.00345	0.000378	-0.000639	-0.00383	-0.000236	0.000858	0.00192	0.00625	-0.000326	-0.00154	-0.00108	-0.00277	-0.00257	-0.00246	-0.000897	-0.00439	-0.0069	-0.00109	-0.00264	-0.00157	-0.000979	-0.0031	-0.0043	-0.00507	-0.00223	0.01073	-0.00087
86.9	-0.00186	-0.00263	-0.00282	-0.00157	0.01874	-0.00156	-0.00486	-0.00343	-0.00344	0.00273	-0.000587	-0.00166	-0.000481	-0.00526	-0.0072	-0.00144	-0.000713	-0.00293	-0.00241	-0.00244	-0.000817	-0.00184	-0.00315	0.000462	-0.000465	-0.00361	-0.00036	0.00101	-0.0048	0.0094	-0.000377	-0.00117	-0.000913	-0.00281	-0.00245	-0.00222	-0.000922	-0.00426	-0.00737	-0.000947	-0.00235	-0.00138	-0.000321	-0.003	-0.0042	-0.00514	-0.00213	0.01178	-0.00083
87	-0.00163	-0.00253	-0.00281	-0.00179	0.02123	-0.0017	-0.00455	-0.00396	-0.00292	-0.000891	-0.000604	-0.00178	0.00026	-0.00549	-0.00724	0.00201	-0.000433	-0.00288	-0.00249	-0.0026	-0.000772	-0.00172	-0.00291	0.000708	-0.000243	-0.00335	-0.000394	0.00121	-0.00532	0.00273	-0.000365	-0.000732	-0.0007	-0.0028	-0.00225	-0.00203	-0.00107	-0.0042	-0.00777	-0.000937	-0.00192	-0.00117	0.000178	-0.0029	-0.0041	-0.00513	-0.00202	0.01281	-0.000704
87.1	-0.00138	-0.00246	-0.00276	-0.00178	0.02365	-0.00185	-0.00415	-0.00403	-0.00217	-0.00675	-0.000603	-0.00189	-0.00397	-0.00401	-0.00628	-0.00209	-0.000195	-0.0026	-0.00245	-0.00276	-0.000562	-0.00146	-0.00274	0.00107	-2.31e-05	-0.00307	-0.000423	0.00145	-0.00518	0.00124	-0.000245	-0.000283	-0.000493	-0.00276	-0.00203	-0.00188	-0.00127	-0.00401	-0.00795	-0.000874	-0.0014	-0.000982	0.000486	-0.00277	-0.00395	-0.00506	-0.00193	0.00844	-0.000483
87.2	-0.00117	-0.00236	-0.00269	-0.00186	0.02595	-0.00191	-0.00373	-0.00294	-0.0012	-0.00757	-0.000578	-0.00197	-0.00436	-0.00159	-0.00285	-0.00258	0.000141	-0.00214	-0.00234	-0.00284	-0.00028	-0.00123	-0.00261	0.00147	0.000173	-0.00286	-0.000453	0.00165	-0.00338	0.00119	-0.000128	0.000203	-0.000258	-0.00265	-0.00183	-0.00176	-0.00153	-0.00378	-0.0081	-0.000787	-0.000977	-0.00116	0.000631	-0.00264	-0.00381	-0.005	-0.00183	-0.00545	-0.000203
87.3	-0.00103	-0.00223	-0.00261	-0.00198	0.02797	-0.002	-0.00333	-0.000232	1.3e-05	-0.00712	-0.000439	-0.00205	-0.00451	-0.00202	0.0031	-0.00219	0.00055	-0.00156	-0.00212	-0.00268	4.59e-05	-0.00127	-0.00249	0.00193	0.000238	-0.00271	-0.000628	0.0017	-0.00049	0.00143	-6.9e-05	0.000601	-5.69e-05	-0.00256	-0.00165	-0.00174	-0.0018	-0.00391	-0.00811	-0.000523	-0.000592	-0.00134	0.000699	-0.00254	-0.00368	-0.00492	-0.00173	-0.00727	-1.82e-05
87.4	-0.000969	-0.00212	-0.00252	-0.00173	0.02958	-0.00209	-0.00276	0.00311	0.00141	-0.00441	-0.000506	-0.00208	-0.00363	-0.00408	0.00253	-0.0014	0.000933	-0.001	-0.00191	-0.00248	0.000151	-0.00143	-0.00236	0.00238	0.000184	-0.00263	-0.000967	0.00175	0.00287	0.00198	-0.00015	0.0009	8.85e-05	-0.00249	-0.00159	-0.00171	-0.00198	-0.00433	-0.00793	-0.000114	-0.000278	-0.00129	0.000694	-0.0024	-0.00354	-0.00484	-0.00163	-0.0084	0.000197
87.5	-0.00091	-0.00204	-0.00245	-0.00183	0.03076	-0.0021	-0.00202	0.0024	0.00285	-0.000878	-0.000819	-0.0021	-0.00128	-0.00453	-0.0053	0.000277	0.00133	-0.000663	-0.00178	-0.00228	0.000277	-0.00163	-0.00227	0.00275	0.000156	-0.00257	-0.0013	0.00174	0.00631	0.00309	-0.00027	0.00118	0.000151	-0.00237	-0.0017	-0.00164	-0.00202	-0.00486	-0.00769	0.000234	-5.66e-06	-0.00115	0.000572	-0.00223	-0.00342	-0.00474	-0.00152	-0.00862	0.000309
87.6	-0.000839	-0.00194	-0.00238	-0.00213	0.03174	-0.00203	-0.00115	-0.00277	0.00448	0.00112	-0.00105	-0.00214	-0.00148	-0.00462	-0.00585	0.00181	0.00165	-0.000472	-0.0018	-0.00203	0.000408	-0.00182	-0.00219	0.00292	0.000155	-0.00242	-0.00162	0.00166	-0.00152	0.00486	-0.000439	0.00137	8.62e-05	-0.00226	-0.0017	-0.00152	-0.00206	-0.00528	-0.0075	0.000426	0.000164	-0.000881	0.000394	-0.00205	-0.00328	-0.00469	-0.0014	-0.00703	0.000317
87.7	-0.000751	-0.00183	-0.00229	-0.0025	0.03254	-0.00191	7.44e-07	-0.00388	0.00593	-0.00357	-0.00112	-0.00204	-0.00527	-0.00368	-0.00525	-0.00435	0.00186	-0.000317	-0.00185	-0.00177	0.000473	-0.00204	-0.00214	0.00292	0.000205	-0.00225	-0.00175	0.00159	-0.00352	0.0015	-0.000607	0.00139	-3.94e-05	-0.00217	-0.00172	-0.00145	-0.002	-0.00544	-0.00741	0.000651	0.000161	-0.000513	0.000297	-0.00188	-0.00313	-0.00475	-0.00132	-0.00309	0.00023
87.8	-0.000626	-0.00169	-0.00219	-0.0028	-0.02012	-0.00175	0.00111	-0.00422	0.00759	-0.00389	-0.000992	-0.0019	-0.00561	-0.00246	-0.00211	-0.00652	0.00187	-0.000192	-0.0019	-0.00149	0.000558	-0.00229	-0.00204	0.0028	0.000301	-0.00215	-0.00202	0.00149	-0.00396	-0.00335	-0.000637	0.00124	-0.000202	-0.00206	-0.00159	-0.00137	-0.00189	-0.00525	-0.00729	0.000759	0.000189	-0.000379	0.000238	-0.00178	-0.00302	-0.00479	-0.00128	0.00112	0.000172
87.9	-0.000493	-0.00156	-0.00207	-0.00288	-0.02993	-0.00157	0.0023	-0.00303	0.00929	-0.00367	-0.000725	-0.00176	-0.00551	-0.00424	0.00343	-0.00666	0.00184	-0.000253	-0.00192	-0.00124	0.000609	-0.00233	-0.00185	0.00262	0.000426	-0.00206	-0.00228	0.00145	-0.00379	-0.00385	-0.000595	0.000897	-0.000376	-0.00193	-0.00141	-0.00122	-0.00179	-0.00471	-0.00713	0.000725	0.000152	-0.000567	0.000223	-0.00165	-0.00292	-0.00468	-0.00118	0.0048	0.000198
88	-0.000347	-0.00139	-0.00196	-0.00271	-0.0353	-0.0014	0.00337	-9.51e-05	0.0107	-0.00193	-0.000279	-0.00168	-0.00414	-0.00526	0.00498	-0.00527	0.00183	-0.00035	-0.00198	-0.00104	0.000496	-0.00213	-0.00169	0.00234	0.00053	-0.00201	-0.00256	0.00143	-0.00198	-0.00383	-0.000499	0.000362	-0.000553	-0.00178	-0.00126	-0.00108	-0.0017	-0.00403	-0.00696	0.000642	5.34e-05	-0.000653	0.000173	-0.00142	-0.00278	-0.00455	-0.00109	-0.00187	0.000381
88.1	-0.000134	-0.00123	-0.00183	-0.00242	-0.03756	-0.0012	0.00507	0.00359	0.01179	0.0013	0.000427	-0.00169	-0.0017	-0.00545	-0.00277	-0.00166	0.00188	-0.000446	-0.00202	-0.000896	0.000335	-0.00188	-0.00156	0.00182	0.00066	-0.00192	-0.00278	0.00137	0.00131	-0.00253	-0.000392	-2.43e-05	-0.000665	-0.00163	-0.00107	-0.00101	-0.00163	-0.00334	-0.00677	0.000606	7.34e-05	-0.000738	7.7e-05	-0.00119	-0.0026	-0.00438	-0.00101	-0.00967	0.000684
88.2	0.000136	-0.00106	-0.0017	-0.00246	-0.03438	-0.000984	0.00696	0.007	0.01264	0.00051	0.00145	-0.00175	-0.00118	-0.00531	-0.00506	0.0024	0.00189	-0.000626	-0.0022	-0.000798	0.000239	-0.00164	-0.0014	0.0013	0.000694	-0.00176	-0.00296	0.00128	0.0048	-2.71e-05	-0.00019	-0.000161	-0.000755	-0.00146	-0.000812	-0.00103	-0.00164	-0.00267	-0.00636	0.000526	-3.72e-07	-0.000594	-5.57e-05	-0.000967	-0.0024	-0.00418	-0.000946	-0.01137	0.00104
88.3	0.000353	-0.000907	-0.00157	-0.00264	-0.02753	-0.000778	0.0095	-0.00316	0.01343	-0.00302	0.00294	-0.00178	-0.00414	-0.00415	-0.00479	0.00354	0.00175	-0.000915	-0.00235	-0.000691	0.00025	-0.00137	-0.00138	0.00088	0.000706	-0.00164	-0.00317	0.00113	0.00286	0.00325	-5.37e-07	-0.000176	-0.000873	-0.00131	-0.000627	-0.000996	-0.00166	-0.00201	-0.0059	0.000472	-9.46e-05	-0.000382	-0.000321	-0.000845	-0.00219	-0.00399	-0.000898	-0.01192	0.0014
88.4	0.000504	-0.000747	-0.00145	-0.00265	-0.02015	-0.00054	0.01286	-0.0042	0.00108	-0.00322	0.00498	-0.0018	-0.00524	-0.00158	-0.00289	-0.00213	0.00156	-0.00108	-0.00242	-0.000606	0.000322	-0.00105	-0.00133	0.00068	0.000666	-0.00156	-0.00331	0.000968	-0.00309	-0.000102	4.01e-05	-0.000132	-0.000917	-0.00119	-0.000405	-0.000867	-0.00174	-0.00142	-0.00552	0.000341	-0.000179	-0.000202	-0.000539	-0.000798	-0.00203	-0.00416	-0.000847	-0.01032	0.00167
88.5	0.000575	-0.000591	-0.00131	-0.00278	-0.01236	-0.000213	0.01626	-0.00476	-0.00967	-0.00218	0.00745	-0.00184	-0.00545	-0.00329	0.00159	-0.00445	0.00133	-0.00114	-0.00251	-0.000497	0.00041	-0.000683	-0.00122	0.000622	0.000558	-0.00149	-0.00328	0.000973	-0.00365	-0.00318	0.000137	-2.34e-05	-0.000961	-0.00108	-9.5e-05	-0.000727	-0.00175	-0.000983	-0.0052	0.00023	-0.000276	-7.93e-05	-0.000599	-0.000772	-0.0019	-0.00418	-0.000818	-0.00679	0.00188
88.6	0.000597	-0.000439	-0.00118	-0.00293	-0.00545	0.00014	0.02001	-0.00383	-0.01198	0.00103	0.00995	-0.00194	-0.0048	-0.0038	0.00586	-0.00457	0.00101	-0.00114	-0.0026	-0.000328	0.000512	-0.000325	-0.000996	0.000581	0.00034	-0.00139	-0.00321	0.00109	-0.00377	-0.00344	0.000238	0.000116	-0.000924	-0.00104	0.00017	-0.000607	-0.00163	-0.000655	-0.00487	0.000113	-0.000479	-3.65e-05	-0.000652	-0.000883	-0.00184	-0.00406	-0.000789	-0.00248	0.00191
88.7	0.000571	-0.000298	-0.00108	-0.00308	0.000268	0.000611	0.02359	-0.000777	-0.01244	0.00205	0.01202	-0.00216	-0.00313	-0.00368	0.000936	-0.00341	0.000659	-0.0012	-0.00264	-0.000237	0.000584	1.78e-05	-0.000751	0.000576	0.000186	-0.0013	-0.00314	0.00116	-0.00269	-0.00322	0.000247	0.000178	-0.00077	-0.00108	0.000234	-0.000489	-0.00143	-0.000474	-0.00448	-0.000174	-0.00055	-0.000191	-0.00055	-0.001	-0.0018	-0.00389	-0.000761	0.00144	0.00179
88.8	0.000566	-0.000175	-0.000955	-0.00294	0.00545	0.00112	0.02743	0.00299	-0.01045	-0.000254	0.01396	-0.00248	-0.00101	-0.00224	-0.00565	-0.000556	0.00036	-0.00121	-0.00265	-0.000198	0.000576	0.000395	-0.000685	0.000557	5.9e-05	-0.00134	-0.00307	0.00111	-2.09e-07	-0.00189	2.69e-05	0.000125	-0.000513	-0.00118	0.000264	-0.000377	-0.00114	-0.000343	-0.00413	-0.000577	-0.000632	-0.000321	-0.000342	-0.00101	-0.00179	-0.00376	-0.000728	0.00536	0.00161
88.9	0.000531	-4.1e-05	-0.000827	-0.0027	0.00949	0.00198	0.03117	0.00388	-0.00723	-0.000584	0.01577	-0.00283	0.00153	0.000198	-0.00591	0.0032	0.000154	-0.00117	-0.00258	-9.32e-05	0.000538	0.000799	-0.000769	0.000521	-9.15e-05	-0.00129	-0.00301	0.00106	0.00333	0.000594	-0.000316	2.17e-05	-0.000185	-0.00128	0.000344	-0.000207	-0.000773	-6.27e-05	-0.00403	-0.000914	-0.000723	-0.000383	-0.000151	-0.000957	-0.00175	-0.00361	-0.000781	0.00751	0.00134
89	0.000505	6.26e-05	-0.000724	-0.00248	0.01359	0.0035	0.03423	-0.00377	-0.00303	-0.000424	0.01748	-0.00317	-0.00292	0.00184	-0.0045	0.0069	-5.26e-05	-0.000985	-0.00247	-1.66e-05	0.000618	0.00113	-0.000958	0.000501	-0.000284	-0.00126	-0.00299	0.00113	0.00667	0.00346	-0.000708	-0.000149	0.000128	-0.00134	0.000549	-6.49e-05	-0.0005	0.000109	-0.00409	-0.00115	-0.000784	-0.000628	0.000114	-0.000983	-0.00176	-0.00345	-0.000891	0.00215	0.00119
89.1	0.000501	0.000165	-0.000632	-0.00208	0.01755	0.0054	0.03721	-0.00489	0.00139	0.000721	0.01906	-0.00337	-0.00366	-0.00265	-0.000984	-0.000973	-0.000198	-0.000702	-0.00231	1.29e-05	0.000651	0.00135	-0.00115	0.000404	-0.000453	-0.00125	-0.00288	0.00104	-0.00202	0.002	-0.00102	-0.000363	0.000478	-0.00141	0.000731	-6.36e-05	-0.000322	0.000225	-0.00424	-0.00113	-0.000767	-0.00077	0.000251	-0.00107	-0.00179	-0.00325	-0.000935	-0.00272	0.00112
89.2	0.000503	0.00026	-0.000527	-0.00146	0.02091	0.00822	0.03979	-0.00535	0.0041	-0.005	0.02057	-0.00349	-0.00386	-0.00347	0.0022	-0.0014	-0.000324	-0.000327	-0.00209	7.31e-05	0.000608	0.00123	-0.00139	0.000274	-0.000707	-0.00114	-0.00274	0.000863	-0.00337	-0.00429	-0.0013	-0.000636	0.000842	-0.00148	0.001	-9.18e-05	-0.000136	0.00037	-0.00451	-0.00118	-0.000747	-0.000856	0.000253	-0.0011	-0.00186	-0.00309	-0.000981	-0.00342	0.00111
89.3	0.000628	0.000347	-0.000414	-0.000739	0.02453	0.01109	0.03608	-0.00426	-0.0033	-0.01352	0.0069	-0.00356	-0.00366	-0.00375	-0.00706	-0.00139	-0.000292	3.08e-05	-0.00183	0.000245	0.000544	0.0006	-0.00175	3.07e-05	-0.000848	-0.000921	-0.00255	0.000796	-0.00402	-0.00492	-0.0016	-0.000975	0.00104	-0.00146	0.00142	-0.000112	-5.75e-05	0.000343	-0.00486	-0.00121	-0.000765	-0.000873	0.000164	-0.00107	-0.00193	-0.00294	-0.00104	-0.00357	0.00105
89.4	0.000834	0.000429	-0.000296	-0.000147	0.02739	0.01377	0.01868	-0.00114	-0.01034	-0.01434	0.00224	-0.00362	-0.00215	-0.00277	-0.00881	-0.000446	-0.000202	0.000309	-0.00159	0.00038	0.000471	-0.000114	-0.00204	-0.000266	-0.000932	-0.00066	-0.00226	0.000864	-0.004	-0.00495	-0.00174	-0.00115	0.000804	-0.00145	0.00184	-0.000103	-4.81e-05	0.000122	-0.00503	-0.00138	-0.000897	-0.00099	0.000102	-0.00112	-0.00202	-0.00285	-0.00103	-0.00245	0.00101
89.5	0.00105	0.000488	-0.000182	0.000666	0.02936	0.0164	0.00951	0.00261	-0.01114	-0.0117	0.000825	-0.00362	0.000483	-5.5e-05	-0.01182	0.0021	-6.78e-05	0.000624	-0.00138	0.000547	0.000486	-0.00055	-0.00212	-0.000369	-0.000995	-0.000474	-0.00188	0.000979	-0.00249	-0.00366	-0.0018	-0.00136	0.000488	-0.00144	0.0023	-8.54e-05	-9.09e-05	-0.000112	-0.00509	-0.00173	-0.000972	-0.00117	7.27e-05	-0.0011	-0.00205	-0.00279	-0.00101	-0.000146	0.00101
89.6	0.00125	0.00053	-9.4e-05	0.00183	0.03099	0.01865	0.0055	0.00619	-0.01025	-0.00623	0.000648	-0.00355	-0.00261	-0.00451	-0.00889	0.00549	5.77e-05	0.000902	-0.00116	0.000749	0.000578	-0.000834	-0.00202	-0.000442	-0.000988	-0.000352	-0.00153	0.001	0.00041	-0.00078	-0.00174	-0.00155	0.000283	-0.00142	0.00255	-3.72e-05	-0.000188	-0.00019	-0.00504	-0.00215	-0.00087	-0.00125	-3.77e-05	-0.00106	-0.00205	-0.00272	-0.000974	0.00292	0.000911
89.7	0.00143	0.000604	-3.09e-05	0.0031	0.03225	0.02064	0.00337	-0.00114	-0.00677	-0.000296	0.00251	-0.00341	-0.00485	-0.00511	-0.00446	0.00367	0.000135	0.00104	-0.000934	0.000962	0.000757	-0.00144	-0.0018	-0.000531	-0.000934	-0.00021	-0.00124	0.000942	0.00361	0.0025	-0.00161	-0.00173	9.5e-05	-0.00139	0.0028	5.95e-05	-0.000336	-0.000297	-0.00494	-0.0026	-0.000652	-0.00126	-0.000182	-0.00106	-0.00202	-0.00277	-0.000942	0.00626	0.00071
89.8	0.00162	0.000808	3.24e-05	0.00436	0.03314	0.02256	0.00509	-0.00318	-0.00223	0.00466	0.00589	-0.00326	-0.00517	-0.00519	0.00154	0.000873	0.000158	0.00101	-0.00076	0.00118	0.000969	-0.00221	-0.00159	-0.000707	-0.000825	-6.12e-05	-0.000948	0.000885	0.00135	-0.000331	-0.00149	-0.00186	-0.00018	-0.00137	0.003	0.00013	-0.000495	-0.000285	-0.0047	-0.00298	-0.000389	-0.00113	-0.000112	-0.00102	-0.00195	-0.00288	-0.000936	-0.00802	0.00062
89.9	0.00179	0.00113	0.000106	0.00573	0.03382	0.02434	0.00785	-0.00303	0.002	-0.00465	0.00748	-0.00309	-0.00497	-0.00384	0.00754	0.000872	0.000216	0.000981	-0.000625	0.00137	0.00108	-0.00333	-0.00154	-0.000812	-0.000747	4.91e-05	-0.000683	0.00072	-0.00497	-0.00436	-0.00136	-0.00197	-0.000353	-0.00135	0.00318	0.000156	-0.000591	-5.95e-05	-0.00437	-0.00345	-9.9e-05	-0.000919	7.62e-06	-0.00099	-0.00189	-0.00299	-0.000937	-0.0095	0.000583
90	0.00193	0.00143	0.000213	0.00764	0.03446	0.02596	4.45e-06	-0.00127	0.00574	-0.00755	-0.0059	-0.00292	-0.00383	-0.000843	0.00147	0.00147	0.000244	0.00095	-0.000549	0.00151	0.00121	-0.00484	-0.00152	-0.000769	-0.000738	0.000123	-0.000427	0.000646	-0.00563	-0.00464	-0.00115	-0.00207	-0.00045	-0.0013	0.00332	0.000203	-0.000667	0.000257	-0.00391	-0.0039	0.000161	-0.000816	2.36e-05	-0.000962	-0.00179	-0.00299	-0.000996	-0.01028	0.000585
[truncated: 150 more columns]
